# Supplementary material for: Large-Scale Functional Analysis of CRP-mediated Feed-Forward Loops
Source: Preprints.org preprint supplement (doi:10.20944/preprints201806.0100.v1), 2018-06-06
Supplement: Supplementary file 1 [file Additional File-1.xlsx]

## Sheet: Data
Type	Gene	TF	cAMP0	cAMP001	cAMP003	cAMP01	cAMP03	cAMP1	cAMP3	cAMP10	ExtraTFs	AllTFs	TU	Idx
C1	acnA	marA	0	-0.13011	-0.230203	-0.138429	-0.187033	0.2439	0.139177	0.188396		C1-marA	acnA	1
C1	araE	araC	0	0.027438	0.0634437	0.0250967	0.027269	0.146837	0.270151	0.159221		C1-araC	araE	1
C1	araF	araC	0	-0.0892126	-0.0354366	-0.0653804	-0.0837372	2.58772	2.50646	2.57884		C1-araC	araFGH	1
C1	araG	araC	0	-0.0291045	0.0168351	-0.0356604	-0.0830465	0.988947	0.916368	0.887441		C1-araC	araFGH	1
C1	araH	araC	0	-0.0369398	-0.163905	-0.121466	-0.220186	0.484981	0.476432	0.492229		C1-araC	araH;araFGH	1
C1	caiA	caiF	0	0.00139932	0.0273315	0.138173	0.0766408	0.33086	0.10416	0.0388934		C1-caiF	caiTABCDE	1
C1	caiB	caiF	0	0.103659	0.104727	0.158366	-0.00210748	0.170889	0.103385	-0.0102681		C1-caiF	caiTABCDE	1
C1	caiC	caiF	0	0.0477933	0.0352513	0.0949612	-0.0642013	-0.206453	-0.253394	-0.410518		C1-caiF	caiCDE;caiTABCDE;	1
C1	caiD	caiF	0	0.00259764	-0.0377495	0.160566	0.0449534	0.078452	0.0476738	0.0238878		C1-caiF	caiTABCDE;caiCDE	1
C1	caiE	caiF	0	0.0983872	0.117088	0.0891259	-0.0394014	0.327461	0.0965685	0.107987		C1-caiF	caiE;caiTABCDE;caiCDE	1
C1	caiT	caiF	0	-0.0417511	-0.0417511	-0.0417511	-0.0417511	-0.0417511	-0.0417511	-0.0417511		C1-caiF	caiTABCDE	1
C1	dctA	dcuR	0	0.0351628	0.720317	1.13964	1.33532	2.798	2.78949	2.81554		C1-dcuR	dctA	1
C1	dcuB	dcuR	0	0.00318543	-0.00620128	0.0450852	-0.00750847	0.369866	0.44493	0.333525		C1-dcuR	dcuB-fumB	1
C1	fecA	pdhR	0	-0.0604734	-0.161556	-0.304967	-0.390078	-0.713925	-0.730504	-0.825314	C1-pdhR;IC1-fur	C1-pdhR;IC1-fur	fecABCDE	17
C1	fecB	pdhR	0	0.0390814	-0.00688291	-0.161435	-0.250928	-0.608372	-0.643872	-0.77214	C1-pdhR;IC1-fur	C1-pdhR;IC1-fur	fecABCDE	17
C1	fecC	pdhR	0	-0.021585	-0.210504	-0.370214	-0.45117	-0.863815	-0.918103	-0.864857	C1-pdhR;IC1-fur	C1-pdhR;IC1-fur	fecABCDE	17
C1	fecD	pdhR	0	-0.0043008	-0.104463	-0.224396	-0.336298	-0.391852	-0.469091	-0.629305	C1-pdhR;IC1-fur	C1-pdhR;IC1-fur	fecABCDE	17
C1	fecE	pdhR	0	0.0126254	-0.112299	-0.202055	-0.324381	-0.787284	-0.780706	-0.904766	C1-pdhR;IC1-fur	C1-pdhR;IC1-fur	fecE;fecABCDE	17
C1	fixA	caiF	0	0	0	0	0	0.156685	0.0199325	0.00923995		C1-caiF	fixABCX	1
C1	fixB	caiF	0	0	0	0.0294249	0	0.157516	0.187765	0.0322046		C1-caiF	fixABCX	1
C1	fixC	caiF	0	0	0	0	0	0.0220021	0.0469198	0		C1-caiF	fixABCX	1
C1	fixX	caiF	0	0	0	0	0	0	0	0		C1-caiF	fixABCX	1
C1	focB	hyfR	0	0.0564176	0.0456389	0.108687	-0.0570206	-0.117789	-0.0659933	-0.220844		C1-hyfR	hyfABCDEFGHIJR-focB	1
C1	fucA	fucR	0	-0.0733893	0.156023	0.432207	0.427049	1.7434	1.82132	2.06745		C1-fucR	fucAO	1
C1	fucI	fucR	0	-0.011937	0.0668938	0.0922656	0.0897081	1.01766	1.07532	0.949055		C1-fucR	fucPIKUR	1
C1	fucK	fucR	0	0.0990423	0.000891403	0.139775	-0.0345793	0.724348	0.744168	0.694842		C1-fucR	fucPIKUR	1
C1	fucO	fucR	0	0.167431	0.503059	0.75064	0.755779	2.83254	2.83502	2.86484		C1-fucR	fucAO	1
C1	fucP	fucR	0	0	0	0	0	0.800645	0.641643	0.804346		C1-fucR	fucPIKUR	1
C1	fucR	fucR	0	0.0180974	0.263035	0.480958	0.459057	1.33564	1.36962	1.37018		C1-fucR	fcuR;fucPIKUR	1
C1	fucU	fucR	0	-0.0015542	0.174664	0.388521	0.301117	0.0790393	0.00342917	0.0125183		C1-fucR	fucPIKUR	1
C1	fumB	dcuR	0	-0.0305988	0.0995365	0.147871	-0.0431608	0.230122	0.0491693	0.0458455	C1-fur;C4-fis	C1-dcuR,fur;C4-fis	fumB;dcuB-fumB	9
C1	fumB	fur	0	-0.0305988	0.0995365	0.147871	-0.0431608	0.230122	0.0491693	0.0458455	C1-dcuR;C4-fis	C1-dcuR,fur;C4-fis	fumB;dcuB-fumB	9
C1	fumC	marA	0	-0.00697669	-0.0659472	0.151802	-0.012367	0.498025	0.461989	0.578933	C1-marA;IC1-fur	C1-marA;IC1-fur	fumC;fumAC	17
C1	fur	oxyR	0	-0.0230411	-0.0712505	-0.0906373	-0.0743666	-0.114819	-0.109564	-0.101282	C1-oxyR;IC1-fur	C1-oxyR;IC1-fur	fur;uof-fur;fldA-uof-fur	17
C1	glpA	flhD	0	-0.0626238	-0.0626238	-0.0626238	-0.0415089	0.200701	0.0412801	0.00338441	C1-flhC;IC1-glpR; IC4-fis	C1-flhC,flhD;IC1-glpR; IC4-fis	glpABC	145
C1	glpA	flhC	0	-0.0626238	-0.0626238	-0.0626238	-0.0415089	0.200701	0.0412801	0.00338441	C1-flhD;IC1-glpR; IC4-fis	C1-flhC,flhD;IC1-glpR; IC4-fis	glpABC	145
C1	glpB	flhD	0	-0.0349472	-0.0722488	0.0331224	-0.17649	0.103633	0.0286261	-0.0283981	C1-flhC;IC1-glpR; IC4-fis	C1-flhC,flhD;IC1-glpR; IC4-fis	glpABC	145
C1	glpB	flhC	0	-0.0349472	-0.0722488	0.0331224	-0.17649	0.103633	0.0286261	-0.0283981	C1-flhD;IC1-glpR; IC4-fis	C1-flhC,flhD;IC1-glpR; IC4-fis	glpABC	145
C1	glpC	flhD	0	0.0653573	0.211508	0.114424	-0.151495	0.101195	0.381387	0.0978235	C1-flhC;IC1-glpR; IC4-fis	C1-flhC,flhD;IC1-glpR; IC4-fis	glpABC	145
C1	glpC	flhC	0	0.0653573	0.211508	0.114424	-0.151495	0.101195	0.381387	0.0978235	C1-flhD;IC1-glpR; IC4-fis	C1-flhC,flhD;IC1-glpR; IC4-fis	glpABC	145
C1	gutM	gutM	0	-0.0382281	0.0495753	0.107651	0.0150983	0.242314	0.375063	0.274875	C1-gutM;IC1-srlR	C1-gutM;IC1-srlR	srlAEBD-gutM-srlR-gutQ	17
C1	gutQ	gutM	0	0.00446967	0.139822	0.220328	0.0936142	0.261343	0.288648	0.207504	C1-gutM;IC1-srlR	C1-gutM;IC1-srlR	srlAEBD-gutM-srlR-gutQ	17
C1	hyfA	hyfR	0	0	0	0	0	0	0	0		C1-hyfR	hyfABCDEFGHIJR-focB	1
C1	hyfB	hyfR	0	0.0746289	-0.0108535	0.0159454	0.035391	0.0759359	-0.0520153	-0.0234413		C1-hyfR	hyfABCDEFGHIJR-focB	1
C1	hyfC	hyfR	0	0	0	0	0	0	0	0		C1-hyfR	hyfABCDEFGHIJR-focB	1
C1	hyfD	hyfR	0	0	0	0	0	0	0	0		C1-hyfR	hyfABCDEFGHIJR-focB	1
C1	hyfE	hyfR	0	0.0574347	-0.0321551	-0.0030281	0.054071	-0.0773424	-0.158636	-0.0892922		C1-hyfR	hyfABCDEFGHIJR-focB	1
C1	hyfF	hyfR	0	-0.0749019	-0.0360852	0.035593	-0.0330432	-0.0130548	-0.139572	-0.0903083		C1-hyfR	hyfABCDEFGHIJR-focB	1
C1	hyfG	hyfR	0	-0.0177721	-0.0417437	-0.129304	-0.194149	-0.226034	-0.118477	-0.22151		C1-hyfR	hyfABCDEFGHIJR-focB	1
C1	hyfH	hyfR	0	0.0433484	-0.0755268	-0.12173	-0.267392	-0.379292	-0.452895	-0.647767		C1-hyfR	hyfABCDEFGHIJR-focB	1
C1	hyfI	hyfR	0	0.0291385	-0.199158	-0.237244	-0.365658	-0.300367	-0.45763	-0.46586		C1-hyfR	hyfABCDEFGHIJR-focB	1
C1	hyfJ	hyfR	0	-0.0228019	-0.0253349	-0.157401	-0.220077	-0.302014	-0.262272	-0.392401		C1-hyfR	hyfABCDEFGHIJR-focB	1
C1	hyfR	hyfR	0	-0.142666	-0.169977	-0.261196	-0.338449	-0.180046	-0.228157	-0.283397		C1-hyfR	hyfABCDEFGHIJR-focB	1
C1	idnD	idnR	0	0	0.352079	0.912181	0.895427	2.85361	2.81569	2.85955		C1-idnR	idnDOTR	1
C1	idnK	idnR	0	-0.0516323	0.134704	0.315822	0.2464	1.29831	1.31608	1.31118		C1-idnR	idnK	1
C1	idnO	idnR	0	-0.0669203	0.4115	0.839802	0.742572	2.25654	2.23001	2.03429		C1-idnR	idnDOTR	1
C1	idnR	idnR	0	-0.00891672	0.0191025	0.11088	0.013804	-0.12647	-0.144849	-0.131208		C1-idnR	idnR;idnDOTR	1
C1	idnT	idnR	0	-0.0848162	0.0372231	0.075047	-0.0480451	0.357907	0.3536	0.410584		C1-idnR	idnDOTR	1
C1	lamB	malT	0	-0.137344	0.434265	0.991264	1.57595	5.39897	5.31401	5.46193		C1-malT	malK-lamB-malM	1
C1	malE	malT	0	0.151891	1.24475	1.89099	2.60914	6.12939	6.13736	6.20888	C1-malT;IC4-fis	C1-malT;IC4-fis	malEFG	129
C1	malF	malT	0	-0.141283	0.21418	0.542157	0.894955	4.49895	4.50091	4.55996	C1-malT;IC4-fis	C1-malT;IC4-fis	malEFG	129
C1	malG	malT	0	-0.0432112	0.119361	0.174973	0.35548	3.71969	3.67581	3.75698	C1-malT;IC4-fis	C1-malT;IC4-fis	malEFG	129
C1	malK	malT	0	0	0.264783	0.881986	1.464	5.97527	6.03023	6.08143		C1-malT	malK-lamB-malM	1
C1	malM	malT	0	-0.0898048	0.396376	0.658931	0.996889	4.50436	4.51441	4.47946		C1-malT	malK-lamB-malM	1
C1	malS	malT	0	0.103445	0.107164	0.136671	0.134412	0.533891	0.730865	0.673741		C1-malT	malS	1
C1	marA	marA	0	0.000269245	-0.0687603	-0.0808392	-0.0863422	-0.310561	-0.433222	-0.446601	C1-marA;IC1-marR;IC4-fis	C1-marA;IC1-marR;IC4-fis	marRAB	145
C1	marB	marA	0	-0.0799731	-0.0087647	-0.183811	-0.172391	-0.520694	-0.401575	-0.570211	C1-marA;IC1-marR;IC4-fis	C1-marA;IC1-marR;IC4-fis	marRAB	145
C1	marR	marA	0	0.050121	-0.0220543	-0.0753314	-0.0941748	-0.28777	-0.397224	-0.453246	C1-marA;IC1-marR;IC4-fis	C1-marA;IC1-marR;IC4-fis	marRAB	145
C1	mhpA	mhpR	0	0.00550742	-0.113331	-0.340293	-0.422302	-0.09914	-0.268575	-0.301485		C1-mhpR	mhpABCDFE	1
C1	mhpB	mhpR	0	0.052068	-0.03853	-0.204392	-0.28107	-0.215904	-0.33834	-0.436216		C1-mhpR	mhpABCDFE	1
C1	mhpC	mhpR	0	-0.03814	-0.0511952	-0.0177956	0.00421787	-0.103863	-0.095799	-0.0629355		C1-mhpR	mhpABCDFE	1
C1	mhpD	mhpR	0	0.0968761	0.0571128	0.341498	0.317908	0.378815	0.28076	0.304387		C1-mhpR	mhpABCDFE	1
C1	mhpE	mhpR	0	0.13	0.164248	0.365016	0.322356	0.431224	0.288408	0.327502		C1-mhpR	mhpABCDFE	1
C1	mhpF	mhpR	0	0.0773001	0.120135	0.308028	0.274435	0.280008	0.217377	0.213904		C1-mhpR	mhpABCDFE	1
C1	ompF	fur	0	0.312851	0.885495	1.21598	1.3946	1.85164	1.82502	1.8676		C1-fur	ompF	1
C1	prpB	prpR	0	-0.031182	-0.152306	-0.262913	-0.192284	0.779073	0.738259	0.997208		C1-prpR	prpBCDE	1
C1	prpC	prpR	0	0.0918002	-0.109084	-0.0976492	-0.217529	1.05026	1.17062	1.0818		C1-prpR	prpBCDE	1
C1	prpD	prpR	0	0	0	0	0	1.01116	1.07125	1.10832		C1-prpR	prpBCDE	1
C1	prpE	prpR	0	0.143616	0.194106	-0.0344146	-0.0070531	0.749962	0.772688	0.861607		C1-prpR	prpBCDE	1
C1	rhaA	rhaS	0	0	0	0	0	0	0	0		C1-rhaS	rhaBAD	1
C1	rhaB	rhaS	0	0	0	0	0	0	0	0		C1-rhaS	rhaBAD	1
C1	rhaD	rhaS	0	0	0	0	0	0	0	0		C1-rhaS	rhaD;rhaBAD	1
C1	rhaR	rhaR	0	-0.0314846	0.0139965	0.0498436	-0.0878107	0.877305	0.849301	0.781159		C1-rhaR	rhaSR	1
C1	rhaS	rhaR	0	0	0	0	0	0	0	0		C1-rhaR	rhaSR	1
C1	sdhA	fur	0	0.661381	1.31578	1.63629	1.73623	1.84431	1.81906	1.84591		C1-fur	sdhDAB;sdhCDAB-sucABCD	1
C1	sdhB	fur	0	0.67827	1.24164	1.55126	1.72492	1.69084	1.69902	1.71392		C1-fur	sdhDAB;sdhCDAB-sucABCD	1
C1	sdhC	fur	0	0.697669	1.33095	1.64337	1.74441	1.87142	1.86848	1.88659		C1-fur	sdhCDAB-sucABCD	1
C1	sdhD	fur	0	0.647055	1.2354	1.626	1.68579	1.80916	1.8121	1.84968		C1-fur	sdhDAB;sdhCDAB-sucABCD	1
C1	sodA	marA	0	-0.023611	-0.0158988	0.0171582	-0.0216892	-0.0467634	-0.0582624	-0.0865569	C1-marA;IC1-fur	C1-marA;IC1-fur	sodA	17
C1	srlA	gutM	0	0	0	0.522896	0.47471	2.61916	2.72444	2.67516	C1-gutM;IC1-srlR	C1-gutM;IC1-srlR	srlAEBD-gutM-srlR-gutQ	17
C1	srlB	gutM	0	0	0.16978	0.760308	0.928537	2.44232	2.35364	2.42897	C1-gutM;IC1-srlR	C1-gutM;IC1-srlR	srlAEBD-gutM-srlR-gutQ	17
C1	srlD	gutM	0	0.128713	0.625803	0.986112	1.02564	2.23717	2.034	2.07343	C1-gutM;IC1-srlR	C1-gutM;IC1-srlR	srlAEBD-gutM-srlR-gutQ	17
C1	srlE	gutM	0	0	1.10639	1.68782	1.80394	3.58864	3.72207	3.62941	C1-gutM;IC1-srlR	C1-gutM;IC1-srlR	srlAEBD-gutM-srlR-gutQ	17
C1	srlR	gutM	0	-0.00920732	-0.0457755	0.0238381	0.0927988	0.211746	0.306432	0.40768	C1-gutM;IC1-srlR	C1-gutM;IC1-srlR	srlAEBD-gutM-srlR-gutQ;srlR	17
C1	sucA	fur	0	0.432134	0.82405	1.15166	1.12681	0.928998	0.880054	0.937934		C1-fur	sucABCD;sdhCDAB-sucABCD;sucAB	1
C1	sucB	fur	0	0.331922	0.586141	0.844737	0.87469	0.708898	0.679035	0.710186		C1-fur	sucABCD;sdhCDAB-sucABCD;sucAB	1
C1	sucC	fur	0	0.394855	0.793121	1.13782	1.1455	1.03304	0.967254	1.017		C1-fur	sucABCD;sdhCDAB-sucABCD	1
C1	sucD	fur	0	0.372592	0.82397	1.12677	1.14839	1.09164	1.06568	1.068		C1-fur	sucABCD;sdhCDAB-sucABCD	1
C1	tdcA	tdcA	0	0	0	0	0	0.379139	0.224134	0.397147		C1-tdcA	tdcABCDEFG	1
C1	tdcB	tdcA	0	0	0	0	0	0.283696	0.391369	0.248551		C1-tdcA	tdcBCDEFG;tdcABCDEFG	1
C1	tdcC	tdcA	0	-0.045088	0.056209	0.132307	0.0749746	0.256783	0.268545	0.171386		C1-tdcA	tdcABCDEFG;tdcBCDEFG	1
C1	tdcD	tdcA	0	0.043441	0.0533661	0.161925	0.0446961	0.427936	0.343178	0.271999		C1-tdcA	tdcABCDEFG;tdcBCDEFG	1
C1	tdcE	tdcA	0	-0.0220733	0.0751576	0.107441	0.105287	0.242547	0.214784	0.174899		C1-tdcA	tdcABCDEFG;tdcBCDEFG	1
C1	tdcF	tdcA	0	0.0650003	-0.0281005	0.0157905	-0.044422	0.112346	-0.0196676	-0.0655698		C1-tdcA	tdcABCDEFG;tdcBCDEFG	1
C1	tdcG	tdcA	0	0.0966936	0.0498304	0.086811	-0.0151143	0.122131	0.085138	0.0104643		C1-tdcA	tdcG;tdcABCDEFG;tdcBCDEFG	1
C1	xylA	xylR	0	-0.0967641	-0.174563	-0.077304	-0.0776288	0.548762	0.565861	0.584118	C1-xylR;IC1-araC	C1-xylR;IC1-araC	xylAB	17
C1	xylB	xylR	0	-0.0913071	-0.199505	0.036156	-0.11708	0.333079	0.25367	0.326204	C1-xylR;IC1-araC	C1-xylR;IC1-araC	xylAB	17
C1	xylF	xylR	0	0.085896	0.219411	0.346585	0.415501	3.73113	3.84165	3.84216	C1-xylR;C4-fis	C1-xylR;C4-fis	xylFGHR	9
C1	xylG	xylR	0	0.013019	0.0126942	0.263179	0.204701	2.11224	2.03874	2.15653	C1-xylR;C4-fis	C1-xylR;C4-fis	xylFGHR	9
C1	xylH	xylR	0	-0.0214436	0.0579513	0.205369	0.152511	1.74075	1.689	1.71694	C1-xylR;C4-fis	C1-xylR;C4-fis	xylFGHR	9
C1	xylR	xylR	0	0.0346299	0.0474307	0.177316	0.0438259	0.390864	0.359986	0.329816	C1-xylR;C4-fis	C1-xylR;C4-fis	xylR;xylFGHR	9
C1	zraR	zraR	0	0.122083	0.118239	0.13967	0.072916	0.248478	0.156833	0.151433		C1-zraR	zraSR	1
C1	zraS	zraR	0	0.145606	0.060885	0.18186	0.0521797	0.446063	0.364511	0.362145		C1-zraR	zraSR	1
C2	citC	dpiA										C2-dpiA	citCDEFXG	2
C2	citD	dpiA	0	0	0	0	0	0	0	0		C2-dpiA	citCDEFXG	2
C2	citE	dpiA	0	0	0	0	0	0	0	0		C2-dpiA	citCDEFXG	2
C2	citF	dpiA	0	0	0	0	0	0	0	0		C2-dpiA	citCDEFXG	2
C2	citG	dpiA	0	0	0	0	0	0	0	0		C2-dpiA	citCDEFXG	2
C2	citX	dpiA	0	0	0	0	0	0	0	0		C2-dpiA	citCDEFXG	2
C2	deoA	fis	0	-0.0872332	-0.238471	-0.369312	-0.405479	-0.0651439	-0.128886	-0.0540504	C2-fis;C3-cytR	C2-fis;C3-cytR	deoABD;deoCABD	6
C2	deoB	fis	0	-0.107385	-0.192699	-0.359669	-0.420842	-0.0891351	-0.174797	-0.170485	C2-fis;C3-cytR	C2-fis;C3-cytR	deoBD;deoCABD;deoABD	6
C2	deoC	fis	0	-0.149989	-0.245225	-0.336009	-0.453006	-0.290026	-0.286707	-0.320784	C2-fis;C3-cytR	C2-fis;C3-cytR	deoCABD	6
C2	deoD	fis	0	-0.0821991	-0.212184	-0.228821	-0.250483	-0.0611252	-0.118498	-0.0607169	C2-fis;C3-cytR	C2-fis;C3-cytR	deoBD;deoCABD;deoABD	6
C2	dpiA	dpiA	0	0.0566244	-0.0510236	-0.0275697	-0.177436	-0.296932	-0.299471	-0.348719	C2-dpiA;IC3-dcuR	C2-dpiA;IC3-dcuR	dpiBA	66
C2	dpiB	dpiA	0	0.021726	-0.0220306	0.0708021	-0.0893916	0.00294518	-0.209573	-0.211693	C2-dpiA;IC3-dcuR	C2-dpiA;IC3-dcuR	dpiBA	66
C2	gadA	gadX	0	-0.523569	-0.822801	-1.31399	-1.49224	-1.43529	-1.46916	-1.42953	C2-gadX;IC2-fis	C2-gadX;IC2-fis	gadAX	34
C2	gadB	gadX	0	-0.450145	-0.731753	-1.21584	-1.29377	-1.29216	-1.32793	-1.28511	C2-gadE;IC2-fis	C2-gadE,gadX;IC2-fis	gadBC	34
C2	gadB	gadE	0	-0.450145	-0.731753	-1.21584	-1.29377	-1.29216	-1.32793	-1.28511	C2-gadX;IC2-fis	C2-gadE,gadX;IC2-fis	gadBC	34
C2	gadC	gadX	0	-0.545045	-0.751987	-1.28157	-1.47639	-1.43871	-1.38335	-1.37435	C2-gadE;IC2-fis	C2-gadE,gadX;IC2-fis	gadC;gadBC	34
C2	gadC	gadE	0	-0.545045	-0.751987	-1.28157	-1.47639	-1.43871	-1.38335	-1.37435	C2-gadX;IC2-fis	C2-gadE,gadX;IC2-fis	gadC;gadBC	34
C2	gadE	gadX	0	-0.514313	-0.82958	-1.31975	-1.4478	-1.43014	-1.47296	-1.4717	C2-gadE	C2-gadE,gadX	gadE;gadE-mdtEF	2
C2	gadE	gadE	0	-0.514313	-0.82958	-1.31975	-1.4478	-1.43014	-1.47296	-1.4717	C2-gadX	C2-gadE,gadX	gadE;gadE-mdtEF	2
C2	gadX	gadX	0	-0.237247	-0.310896	-0.522036	-0.586659	-0.318129	-0.333635	-0.382892	C2-gadX;IC2-fis	C2-gadX;IC2-fis	gadX;gadAX;gadXW	34
C2	glnL	fis	0	0.00628097	0.037937	0.0594814	-0.0270294	-0.366206	-0.300212	-0.268435		C2-fis	glnLG;glnALG	2
C2	gltB	gadE	0	0.164644	0.213675	0.385044	0.32699	-0.337164	-0.481911	-0.387137	C2-gadE;C3-fur	C2-gadE;C3-fur	gltBDF	6
C2	gltD	gadE	0	0.188953	0.170438	0.452254	0.417164	-0.533763	-0.587146	-0.45676	C2-gadE;C3-fur	C2-gadE;C3-fur	gltBDF	6
C2	gltF	gadE	0	0.370358	0.577754	0.833866	0.838925	-0.291248	-0.494149	-0.585803	C2-gadE;C3-fur	C2-gadE;C3-fur	gltBDF	6
C2	infB	fis	0	0.013965	-0.0576563	-0.110317	-0.10329	-0.131148	-0.14495	-0.157322		C2-fis	metY-rimP-nusA-infB-rbfA-truB-rpsO-pnp;rimP-nusA-infB;metY-rimP-nusA-infB	2
C2	mdtE	gadX	0	-0.536269	-0.864716	-1.27392	-1.50406	-1.72152	-1.81123	-1.86631	C2-gadE	C2-gadE,gadX	mdtEF;gadE-mdtEF	2
C2	mdtE	gadE	0	-0.536269	-0.864716	-1.27392	-1.50406	-1.72152	-1.81123	-1.86631	C2-gadX	C2-gadE,gadX	mdtEF;gadE-mdtEF	2
C2	mdtF	gadX	0	-0.544961	-0.774806	-1.16685	-1.37007	-1.58038	-1.61214	-1.79164	C2-gadE	C2-gadE,gadX	gadE-mdtEF;mdtEF	2
C2	mdtF	gadE	0	-0.544961	-0.774806	-1.16685	-1.37007	-1.58038	-1.61214	-1.79164	C2-gadX	C2-gadE,gadX	gadE-mdtEF;mdtEF	2
C2	metY	fis										C2-fis	metY-rimP-nusA-infB-rbfA-truB-rpsO-pnp;metY-rimP-nusA-infB;metY	2
C2	nusA	fis	0	-0.00795036	-0.0802166	-0.157832	-0.153964	-0.215725	-0.236892	-0.268851		C2-fis	metY-rimP-nusA-infB-rbfA-truB-rpsO-pnp;rimP-nusA-infB;metY-rimP-nusA-infB	2
C2	pnp	fis	0	0.00123024	-0.0240411	-0.00055709	-0.0297778	0.172431	0.126209	0.155331		C2-fis	pnp;metY-rimP-nusA-infB-rbfA-truB-rpsO-pnp;rpsO-pnp	2
C2	proP	fis	0	-0.143344	-0.339443	-0.542736	-0.763002	-1.4561	-1.59813	-1.5508		C2-fis	proP	2
C2	rbfA	fis	0	0.0797693	0.0518667	0.0327769	-0.0370585	-0.0335604	-0.0608907	-0.0584769		C2-fis	metY-rimP-nusA-infB-rbfA-truB-rpsO-pnp	2
C2	rimP	fis	0	-0.0612107	-0.183591	-0.207998	-0.263436	-0.383661	-0.453702	-0.473137		C2-fis	rimP-nusA-infB;metY-rimP-nusA-infB-rbfA-truB-rpsO-pnp;metY-rimP-nusA-infB	2
C2	rpsO	fis	0	0.0366228	0.0427133	-0.033422	-0.0392918	-0.227514	-0.225391	-0.275978		C2-fis	rpsO;metY-rimP-nusA-infB-rbfA-truB-rpsO-pnp;rpsO-pnp	2
C2	truB	fis	0	0.060822	-0.0238022	-0.0251676	-0.0370854	-0.0550751	-0.109928	-0.0806966		C2-fis	metY-rimP-nusA-infB-rbfA-truB-rpsO-pnp	2
C3	deoA	cytR	0	-0.0872332	-0.238471	-0.369312	-0.405479	-0.0651439	-0.128886	-0.0540504	C3-cytR;C2-fis	C3-cytR;C2-fis	deoABD;deoCABD	6
C3	deoB	cytR	0	-0.107385	-0.192699	-0.359669	-0.420842	-0.0891351	-0.174797	-0.170485	C3-cytR;C2-fis	C3-cytR;C2-fis	deoBD;deoCABD;deoABD	6
C3	deoC	cytR	0	-0.149989	-0.245225	-0.336009	-0.453006	-0.290026	-0.286707	-0.320784	C3-cytR;C2-fis	C3-cytR;C2-fis	deoCABD	6
C3	deoD	cytR	0	-0.0821991	-0.212184	-0.228821	-0.250483	-0.0611252	-0.118498	-0.0607169	C3-cytR;C2-fis	C3-cytR;C2-fis	deoBD;deoCABD;deoABD	6
C3	galM	hupB	0	-0.014755	-0.0322374	-0.0406161	-0.0731689	0.0253625	-0.0124301	-0.0271492	C3-hupA	C3-hupA,hupB	galM;galETKM	4
C3	galM	hupA	0	-0.014755	-0.0322374	-0.0406161	-0.0731689	0.0253625	-0.0124301	-0.0271492	C3-hupB	C3-hupA,hupB	galM;galETKM	4
C3	gltB	fur	0	0.164644	0.213675	0.385044	0.32699	-0.337164	-0.481911	-0.387137	C3-fur;C2-gadE	C3-fur;C2-gadE	gltBDF	6
C3	gltD	fur	0	0.188953	0.170438	0.452254	0.417164	-0.533763	-0.587146	-0.45676	C3-fur;C2-gadE	C3-fur;C2-gadE	gltBDF	6
C3	gltF	fur	0	0.370358	0.577754	0.833866	0.838925	-0.291248	-0.494149	-0.585803	C3-fur;C2-gadE	C3-fur;C2-gadE	gltBDF	6
C3	nagD	nagC	0	0.0105914	0.0628088	0.123189	0.098349	-0.0544711	-0.09861	-0.104783		C3-nagC	nagD;nagBACD	4
C3	rpoH	cytR	0	-0.0988905	0.00984677	-0.0108344	-0.0504219	-0.156481	-0.131803	-0.190558		C3-cytR	rpoH	4
C3	ycdZ	cytR	0	-0.0377548	-0.20553	-0.358022	-0.415635	-0.164299	-0.0640136	-0.0710066		C3-cytR	ycdZ	4
C4	acnB	fis	0	-0.0343342	0.0903117	0.280844	0.356312	-0.00556026	-0.0430837	0.055148		C4-fis	acnB	8
C4	acs	fis	0	0.291402	1.32528	2.01206	2.25205	3.87403	3.98837	4.02508		C4-fis	acs-yjcH-actP	8
C4	actP	fis	0	0.278302	1.32562	2.16669	2.41852	5.03449	5.19104	5.31001		C4-fis	actP;acs-yjcH-actP	8
C4	aldB	fis	0	-0.0519866	0.0982225	0.441299	0.633148	3.04508	3.13944	3.26163		C4-fis	aldB	8
C4	ansB	fis	0	0.124928	0.0935693	0.213659	0.0223305	0.189201	0.16796	0.116307		C4-fis	ansB	8
C4	bglB	fis	0	0	0	0	0	0	0	0		C4-fis	bglGFB	8
C4	bglF	fis	0	-0.0435978	-0.079973	0.053852	-0.0626406	-0.370777	-0.299425	-0.110656		C4-fis	bglGFB	8
C4	bglG	fis	0	0	0	0	0	0	0	0		C4-fis	bglG;bglGFB	8
C4	crp	fis	0	0.0380987	0.122839	0.174685	0.162126	0.143404	0.0926535	0.119853		C4-fis	crp	8
C4	fadL	ompR	0	-0.0595359	0.239936	0.461923	0.607111	2.40489	2.50931	2.58567		C4-ompR	fadL	8
C4	flhC	ompR	0	0.219578	0.658548	1.01928	1.08261	1.73356	1.69479	1.71722	C4-ompR;IC1-fur	C4-ompR;IC1-fur	flhC;flhDC	24
C4	flhD	ompR	0	0.229676	0.658785	0.992584	1.0804	1.85535	1.76121	1.84754	C4-ompR;IC1-fur	C4-ompR;IC1-fur	flhDC	24
C4	fumB	fis	0	-0.0305988	0.0995365	0.147871	-0.0431608	0.230122	0.0491693	0.0458455	C4-fis;C1-dcuR,fur	C4-fis;C1-dcuR,fur	fumB;dcuB-fumB	9
C4	glcC	fis	0	0.117194	0.190473	0.351499	0.303424	1.52317	1.51728	1.58408	C4-fis;IC1-glcC	C4-fis;IC1-glcC	glcC	24
C4	guaA	fis	0	0.0449747	-0.219707	-0.385483	-0.419383	-1.07256	-1.17872	-1.12437		C4-fis	guaBA	8
C4	guaB	fis	0	0.0641495	-0.211688	-0.491549	-0.568746	-1.20619	-1.2486	-1.301		C4-fis	guaBA	8
C4	gyrA	fis	0	0.0465362	-0.054086	0.031788	-0.0829659	-0.470094	-0.481894	-0.44341		C4-fis	gyrA	8
C4	hlyE	fis	0	0.0191808	0.00742827	-0.0593539	-0.20323	1.23093	1.2668	1.13725		C4-fis	hlyE	8
C4	hupB	fis	0	0.0265346	-0.0492149	0.422353	0.228952	0.482044	0.437913	0.591182		C4-fis	hupB	8
C4	lyxK	yiaJ	0	0	0	0	0	0.157791	0.0277794	0		C4-yiaJ	yiaKLMNO-lyxK-sgbHUE	8
C4	mglA	fis	0	0.468625	2.11594	3.02799	3.20381	4.56284	4.58222	4.60072	C4-fis,IC1-flhC,flhD,galS	C4-fis,IC1-flhC,flhD,galS	mglAC;mglBAC	8
C4	mglC	fis	0	0.322861	1.85383	2.57607	2.79617	3.88264	3.93276	3.95231	C4-fis;IC1-flhC,flhD,galS	C4-fis;IC1-flhC,flhD,galS	mglC;mglBAC;mglAC	24
C4	mtlA	fis	0	0.214675	0.65204	1.10537	1.08613	1.96668	1.95887	1.97532	C4-fis;IC1-mtlR	C4-fis;IC1-mtlR	mtlADR	24
C4	mtlD	fis	0	0.148972	0.215403	0.527774	0.485413	1.00596	0.925598	0.983246	C4-fis;IC1-mtlR	C4-fis;IC1-mtlR	mtlADR	24
C4	mtlR	fis	0	0.178128	0.342172	0.491399	0.593023	1.12502	1.08952	1.08522	C4-fis;IC1-mtlR	C4-fis;IC1-mtlR	mtlADR	24
C4	nanA	fis	0	0.118794	0.502959	0.79518	0.916596	2.69207	2.69406	2.75474		C4-fis	nanATEK-yhcH	8
C4	nanE	fis	0	-0.0432995	0.104422	0.134011	0.0945753	0.898548	0.953068	0.932255		C4-fis	nanATEK-yhcH	8
C4	nanK	fis	0	-0.0309385	0.0491214	0.102913	0.10207	0.814079	0.778266	0.772395		C4-fis	nanATEK-yhcH	8
C4	nanT	fis	0	-0.0123381	0.113574	0.23057	0.164834	1.53198	1.57228	1.6433		C4-fis	nanATEK-yhcH	8
C4	nmpC	ompR	0	0.785481	3.01897	3.77101	4.07696	5.34264	5.33021	5.22275		C4-ompR	nmpC	8
C4	pflB	fis	0	-0.0828817	-0.110836	-0.160858	-0.192851	-0.120674	-0.164699	-0.117892		C4-fis	pflB;focA-pflB	8
C4	sgbE	yiaJ	0	0.0777673	0.0295098	0.0512456	-0.127137	0.060746	-0.0352677	-0.0234727		C4-yiaJ	yiaKLMNO-lyxK-sgbHUE	8
C4	sgbH	yiaJ	0	0.0160577	0.0107904	0.177792	0.0916544	0.127561	0.0359095	0.14247		C4-yiaJ	yiaKLMNO-lyxK-sgbHUE	8
C4	sgbU	yiaJ	0	0.0597535	-0.024305	-0.00354646	0.000978379	0.220497	0.00613414	-0.029674		C4-yiaJ	yiaKLMNO-lyxK-sgbHUE	8
C4	xylF	fis	0	0.085896	0.219411	0.346585	0.415501	3.73113	3.84165	3.84216	C4-fis;C1-xylR	C4-fis;C1-xylR	xylFGHR	9
C4	xylG	fis	0	0.013019	0.0126942	0.263179	0.204701	2.11224	2.03874	2.15653	C4-fis;C1-xylR	C4-fis;C1-xylR	xylFGHR	9
C4	xylH	fis	0	-0.0214436	0.0579513	0.205369	0.152511	1.74075	1.689	1.71694	C4-fis;C1-xylR	C4-fis;C1-xylR	xylFGHR	9
C4	xylR	fis	0	0.0346299	0.0474307	0.177316	0.0438259	0.390864	0.359986	0.329816	C4-fis;C1-xylR	C4-fis;C1-xylR	xylR;xylFGHR	9
C4	yhcH	fis	0	-0.0796795	-0.136854	-0.256846	-0.386481	0.209901	0.197483	0.153536		C4-fis	yhcH;nanATEK-yhcH	8
C4	yiaK	yiaJ	0	0	0.0590562	0.114862	0.167873	1.02238	1.05406	0.966581		C4-yiaJ	yiaKLMNO-lyxK-sgbHUE	8
C4	yiaN	yiaJ	0	0	0	0	0.00355977	0.0435135	0	0		C4-yiaJ	yiaKLMNO-lyxK-sgbHUE	8
C4	yiaO	yiaJ	0	0	0	0	0	0.0624991	0.127657	0.0504541		C4-yiaJ	yiaKLMNO-lyxK-sgbHUE	8
C4	yjcH	fis	0	0.374077	1.58615	2.35836	2.66913	5.14067	5.33208	5.56984		C4-fis	acs-yjcH-actP	8
IC1	aceE	pdhR	0	-0.00845148	0.0371085	0.201991	0.155932	0.286604	0.227386	0.302773		IC1-pdhR	aceEF;pdhR-aceEF-lpd	16
IC1	aceF	pdhR	0	-0.0103878	0.0301069	0.218288	0.221817	0.385017	0.315243	0.406178		IC1-pdhR	aceEF;pdhR-aceEF-lpd	16
IC1	cdd	cytR	0	0.134892	0.291086	0.148095	0.0992496	1.58564	1.61201	1.68352		IC1-cytR	cdd	16
IC1	chbA	nagC	0	0.0160108	0.0664471	-0.0130479	-0.0421738	0.172243	0.152537	0.105584		IC1-nagC	chbBCARFG	16
IC1	chbB	nagC	0	-0.0328187	0.0648049	-0.0118589	0.0064332	0.670023	0.709883	0.650794		IC1-nagC	chbBCARFG	16
IC1	chbC	nagC	0	0	0	0	0	0	0	0		IC1-nagC	chbBCARFG	16
IC1	chbF	nagC	0	-0.0805766	-0.223452	-0.0553698	-0.240364	-0.133659	-0.210776	-0.239592		IC1-nagC	chbBCARFG	16
IC1	chbG	nagC	0	-0.00768442	0.0909407	-0.0139109	-0.0476321	-0.0544635	-0.0484412	-0.141749		IC1-nagC	chbG;chbBCARFG	16
IC1	chbR	nagC	0	-0.0906144	-0.0591644	-0.136885	-0.278417	-0.16309	-0.137003	-0.213483		IC1-nagC	chbBCARFG	16
IC1	cirA	fur	0	0.167127	0.366036	0.599568	0.681721	0.471451	0.364159	0.36294		IC1-fur	cirA	16
IC1	crr	nagC	0	-0.0228888	-0.0278922	-0.0408017	-0.0600229	0.0601155	0.0445578	0.0185116		IC1-nagC	crr;ptsHI-crr	16
IC1	cyoA	pdhR	0	0.0811829	0.190707	0.298533	0.286172	0.0254217	0.0138236	0.0245792	IC1-fur;IC4-gadE	IC1-fur,pdhR;IC4-gadE	cyoABCDE	144
IC1	cyoA	fur	0	0.0811829	0.190707	0.298533	0.286172	0.0254217	0.0138236	0.0245792	IC1-pdhR;IC4-gadE	IC1-fur,pdhR;IC4-gadE	cyoABCDE	144
IC1	cyoB	pdhR	0	0.14097	0.252471	0.410898	0.371377	0.0937497	0.0828111	0.1323	IC1-fur;IC4-gadE	IC1-fur,pdhR;IC4-gadE	cyoABCDE	144
IC1	cyoB	fur	0	0.14097	0.252471	0.410898	0.371377	0.0937497	0.0828111	0.1323	IC1-pdhR;IC4-gadE	IC1-fur,pdhR;IC4-gadE	cyoABCDE	144
IC1	cyoC	pdhR	0	0.134459	0.245861	0.421507	0.415551	0.0793086	0.0856268	0.124863	IC1-fur;IC4-gadE	IC1-fur,pdhR;IC4-gadE	cyoABCDE	144
IC1	cyoC	fur	0	0.134459	0.245861	0.421507	0.415551	0.0793086	0.0856268	0.124863	IC1-pdhR;IC4-gadE	IC1-fur,pdhR;IC4-gadE	cyoABCDE	144
IC1	cyoD	pdhR	0	0.16211	0.330576	0.561424	0.579468	0.200091	0.19395	0.218405	IC1-fur;IC4-gadE	IC1-fur,pdhR;IC4-gadE	cyoABCDE	144
IC1	cyoD	fur	0	0.16211	0.330576	0.561424	0.579468	0.200091	0.19395	0.218405	IC1-pdhR;IC4-gadE	IC1-fur,pdhR;IC4-gadE	cyoABCDE	144
IC1	cyoE	pdhR	0	0.210256	0.342752	0.503084	0.566839	0.266823	0.252984	0.279932	IC1-fur;IC4-gadE	IC1-fur,pdhR;IC4-gadE	cyoE;cyoABCDE	144
IC1	cyoE	fur	0	0.210256	0.342752	0.503084	0.566839	0.266823	0.252984	0.279932	IC1-pdhR;IC4-gadE	IC1-fur,pdhR;IC4-gadE	cyoE;cyoABCDE	144
IC1	cytR	cytR	0	0.0229652	0.0688738	0.218096	0.22467	0.589271	0.539251	0.537359		IC1-cytR	cytR	16
IC1	entA	fur	0	0.163897	0.184435	0.304601	0.343843	-0.374364	-0.412614	-0.385522		IC1-fur	entCEBAH	16
IC1	entB	fur	0	0.117648	0.169437	0.332882	0.303684	-0.355767	-0.45151	-0.40973		IC1-fur	entCEBAH	16
IC1	entC	fur	0	0.0580706	0.0612864	0.0352207	0.1237	-0.30406	-0.329211	-0.37068		IC1-fur	entCEBAH	16
IC1	entD	fur	0	0.158714	0.134022	0.363616	0.386603	-0.615791	-0.282157	-0.14504		IC1-fur	entD;fepA-entD	16
IC1	entE	fur	0	0.0732032	0.131182	0.257181	0.268479	-0.38942	-0.3618	-0.327006		IC1-fur	entCEBAH	16
IC1	entH	fur	0	0.143878	0.10867	0.235183	0.300255	-0.400027	-0.556843	-0.479311		IC1-fur	entH;entCEBAH	16
IC1	fecA	fur	0	-0.0604734	-0.161556	-0.304967	-0.390078	-0.713925	-0.730504	-0.825314	IC1-fur;C1-pdhR	IC1-fur;C1-pdhR	fecABCDE	17
IC1	fecB	fur	0	0.0390814	-0.00688291	-0.161435	-0.250928	-0.608372	-0.643872	-0.77214	IC1-fur;C1-pdhR	IC1-fur;C1-pdhR	fecABCDE	17
IC1	fecC	fur	0	-0.021585	-0.210504	-0.370214	-0.45117	-0.863815	-0.918103	-0.864857	IC1-fur;C1-pdhR	IC1-fur;C1-pdhR	fecABCDE	17
IC1	fecD	fur	0	-0.0043008	-0.104463	-0.224396	-0.336298	-0.391852	-0.469091	-0.629305	IC1-fur;C1-pdhR	IC1-fur;C1-pdhR	fecABCDE	17
IC1	fecE	fur	0	0.0126254	-0.112299	-0.202055	-0.324381	-0.787284	-0.780706	-0.904766	IC1-fur;C1-pdhR	IC1-fur;C1-pdhR	fecE;fecABCDE	17
IC1	fepA	fur	0	0.150478	0.24294	0.406817	0.510699	0.152098	0.0414694	0.133966		IC1-fur	fepA-entD	16
IC1	fiu	fur	0	0.24627	0.425589	0.710289	0.806335	0.0256918	0.0770498	0.190287		IC1-fur	fiu	16
IC1	flhC	fur	0	0.219578	0.658548	1.01928	1.08261	1.73356	1.69479	1.71722	IC1-fur;C4-ompR	IC1-fur;C4-ompR	flhC;flhDC	24
IC1	flhD	fur	0	0.229676	0.658785	0.992584	1.0804	1.85535	1.76121	1.84754	IC1-fur;C4-ompR	IC1-fur;C4-ompR	flhDC	24
IC1	fumC	fur	0	-0.00697669	-0.0659472	0.151802	-0.012367	0.498025	0.461989	0.578933	IC1-fur;C1-marA	IC1-fur;C1-marA	fumC;fumAC	17
IC1	fur	fur	0	-0.0230411	-0.0712505	-0.0906373	-0.0743666	-0.114819	-0.109564	-0.101282	IC1-fur;C1-oxyR	IC1-fur;C1-oxyR	fur;uof-fur;fldA-uof-fur	17
IC1	galE	hupB	0	0.0201706	-0.000716625	0.0175766	-0.0154936	0.13739	0.076409	0.0657109	IC1-hupA	IC1-hupA,hupB	galETKM	16
IC1	galE	hupA	0	0.0201706	-0.000716625	0.0175766	-0.0154936	0.13739	0.076409	0.0657109	IC1-hupB	IC1-hupA,hupB	galETKM	16
IC1	galK	hupB	0	0.00084889	0.0282092	0.097459	0.117349	0.571442	0.473911	0.50409	IC1-hupA	IC1-hupA,hupB	galETKM	16
IC1	galK	hupA	0	0.00084889	0.0282092	0.097459	0.117349	0.571442	0.473911	0.50409	IC1-hupB	IC1-hupA,hupB	galETKM	16
IC1	galP	galS	0	-0.159515	-0.333127	-0.363645	-0.535693	-2.07219	-2.13402	-2.22808	IC1-nagC	IC1-galS,nagC	galP	16
IC1	galP	nagC	0	-0.159515	-0.333127	-0.363645	-0.535693	-2.07219	-2.13402	-2.22808	IC1-galS	IC1-galS,nagC	galP	16
IC1	galS	galS	0	-0.00764748	-0.0542875	-0.253931	-0.311939	0.895066	0.906801	0.94167		IC1-galS	galS	16
IC1	galT	hupB	0	0.0495514	0.0651333	0.0941186	0.0427449	0.297438	0.213396	0.223576	IC1-hupA	IC1-hupA,hupB	galETKM	16
IC1	galT	hupA	0	0.0495514	0.0651333	0.0941186	0.0427449	0.297438	0.213396	0.223576	IC1-hupB	IC1-hupA,hupB	galETKM	16
IC1	glcC	glcC	0	0.117194	0.190473	0.351499	0.303424	1.52317	1.51728	1.58408	IC1-glcC;C4-fis	IC1-glcC;C4-fis	glcC	24
IC1	glpA	glpR	0	-0.0626238	-0.0626238	-0.0626238	-0.0415089	0.200701	0.0412801	0.00338441	IC1-glpR;C1-flhC,flhD; IC4-fis	IC1-glpR;C1-flhC,flhD; IC4-fis	glpABC	17
IC1	glpB	glpR	0	-0.0349472	-0.0722488	0.0331224	-0.17649	0.103633	0.0286261	-0.0283981	IC1-glpR;C1-flhC,flhD; IC4-fis	IC1-glpR;C1-flhC,flhD; IC4-fis	glpABC	17
IC1	glpC	glpR	0	0.0653573	0.211508	0.114424	-0.151495	0.101195	0.381387	0.0978235	IC1-glpR;C1-flhC,flhD; IC4-fis	IC1-glpR;C1-flhC,flhD; IC4-fis	glpABC	17
IC1	glpD	glpR	0	0.0142091	0.0561103	0.0898278	-0.00396871	0.459471	0.50793	0.434178		IC1-glpR	glpD	16
IC1	glpF	glpR	0	-0.000347526	0.00847217	0.170823	0.107651	1.55224	1.55814	1.58066		IC1-glpR	glpFKX	16
IC1	glpK	glpR	0	-0.0227419	0.0301236	0.167435	0.0662296	1.31468	1.29402	1.37683		IC1-glpR	glpFKX	16
IC1	glpQ	glpR	0	0.000577522	-0.0761801	-0.0941787	-0.106938	0.217529	0.0875844	0.149361	IC1-glpR;IC4-fis	IC1-glpR;IC4-fis	glpTQ	144
IC1	glpT	glpR	0	0.0728577	0.109851	0.108839	0.112761	0.731808	0.867214	0.995893	IC1-glpR;IC4-fis	IC1-glpR;IC4-fis	glpTQ	144
IC1	glpX	glpR	0	-0.0145243	-0.176383	-0.124607	-0.315868	-0.221279	-0.303369	-0.234318		IC1-glpR	glpX;glpFKX	16
IC1	gntK	idnR	0	-0.106292	0.0202336	0.177466	0.117311	0.431029	0.595343	0.536563		IC1-idnR	gntKU;gntRKU;gntK	16
IC1	gntP	uxuR	0	0.0440916	0.253694	0.620632	0.545594	2.33767	2.40418	2.46551	IC1-uxuR	IC1-uxuR,oxyR	gntP	16
IC1	gntP	oxyR	0	0.0440916	0.253694	0.620632	0.545594	2.33767	2.40418	2.46551	IC1-oxyR	IC1-uxuR,oxyR	gntP	16
IC1	gntU	idnR	0	0.0185568	0.186513	0.287303	0.11568	0.565324	0.72472	0.640608		IC1-idnR	gntU;gntRKU;gntKU	16
IC1	grcA	pdhR	0	-0.0570308	0.441292	0.731115	0.746685	0.993261	1.02972	0.939054	IC1-fur;IC4-fis	IC1-fur,pdhR;IC4-fis	grcA	144
IC1	grcA	fur	0	-0.0570308	0.441292	0.731115	0.746685	0.993261	1.02972	0.939054	IC1-pdhR;IC4-fis	IC1-fur,pdhR;IC4-fis	grcA	144
IC1	gutM	srlR	0	-0.0382281	0.0495753	0.107651	0.0150983	0.242314	0.375063	0.274875	IC1-srlR;C1-gutM	IC1-srlR;C1-gutM	srlAEBD-gutM-srlR-gutQ	17
IC1	gutQ	srlR	0	0.00446967	0.139822	0.220328	0.0936142	0.261343	0.288648	0.207504	IC1-srlR;C1-gutM	IC1-srlR;C1-gutM	srlAEBD-gutM-srlR-gutQ	17
IC1	lpd	pdhR	0	-0.00411116	-0.0133005	0.0886965	0.00631563	0.0402113	-0.0188617	0.0254055	IC1-pdhR;IC4-fis,fur	IC1-pdhR;IC4-fis,fur	lpd;pdhR-aceEF-lpd	144
IC1	lsrA	lsrR	0	0.105703	0.217922	0.401414	0.340743	1.40397	1.45907	1.52901		IC1-lsrR	lsrACDBFG-tam	16
IC1	lsrB	lsrR	0	0.0347573	0.173966	0.416266	0.325476	1.66577	1.45091	1.5227		IC1-lsrR	lsrACDBFG-tam	16
IC1	lsrC	lsrR	0	-0.0213362	0.0592534	0.246307	0.179156	1.15972	1.06138	1.04378		IC1-lsrR	lsrACDBFG-tam	16
IC1	lsrD	lsrR	0	0.083703	0.169709	0.279824	0.0983041	1.0868	1.18261	1.03045		IC1-lsrR	lsrACDBFG-tam	16
IC1	lsrF	lsrR	0	-0.00461787	0.00497243	0.118031	0.0777589	1.25191	1.24889	1.21834		IC1-lsrR	lsrACDBFG-tam	16
IC1	lsrG	lsrR	0	0.00144103	-0.0221881	0.0255693	-0.0370064	1.034	1.11188	1.0212		IC1-lsrR	lsrACDBFG-tam	16
IC1	lsrK	lsrR	0	-0.0019549	0.17382	0.335059	0.338916	1.57333	1.59565	1.60304		IC1-lsrR	lsrK;lsrRK	16
IC1	lsrR	lsrR	0	-0.0595314	-0.0307404	0.275004	0.287042	1.32023	1.17467	1.30424		IC1-lsrR	lsrRK	16
IC1	malI	malI	0	0.01165	0.14707	0.335169	0.292893	0.874971	0.978399	0.966571		IC1-malI	malI	16
IC1	malX	malI	0	0.00828559	0.196121	0.354361	0.364533	1.18897	1.19273	1.34006		IC1-malI	malXY	16
IC1	malY	malI	0	0.00477061	0.157686	0.222742	0.14897	0.290463	0.328897	0.202176		IC1-malI	malXY	16
IC1	manX	nagC	0	-0.0536591	0.69656	1.26695	1.30126	2.4604	2.45663	2.48463		IC1-nagC	manXYZ	16
IC1	manY	nagC	0	0.0151261	0.613241	1.09215	1.1836	2.28248	2.30034	2.39664		IC1-nagC	manXYZ	16
IC1	manZ	nagC	0	0.00240085	0.54193	1.08889	1.21971	2.40522	2.39665	2.51234		IC1-nagC	manXYZ	16
IC1	marA	marR	0	0.000269245	-0.0687603	-0.0808392	-0.0863422	-0.310561	-0.433222	-0.446601	IC1-marR;C1-marA;IC4-fis	IC1-marR;C1-marA;IC4-fis	marRAB	145
IC1	marB	marR	0	-0.0799731	-0.0087647	-0.183811	-0.172391	-0.520694	-0.401575	-0.570211	IC1-marR;C1-marA;IC4-fis	IC1-marR;C1-marA;IC4-fis	marRAB	145
IC1	marR	marR	0	0.050121	-0.0220543	-0.0753314	-0.0941748	-0.28777	-0.397224	-0.453246	IC1-marR;C1-marA;IC4-fis	IC1-marR;C1-marA;IC4-fis	marRAB	145
IC1	mazE	mazE	0	-0.00964761	-0.086559	-2.3145e-05	0.00505209	0.0789113	-0.0726933	-0.00232685	IC1-mazE;IC4-fis	IC1-mazE;IC4-fis	mazEFG;relA-mazEF	144
IC1	mazF	mazE	0	-0.0512414	-0.0391105	0.0361259	0.0050971	-0.0704307	-0.141671	0.00440882	IC1-mazE;IC4-fis	IC1-mazE;IC4-fis	mazEFG;relA-mazEF	144
IC1	mdh	flhD	0	0.0264373	0.0470145	0.161486	0.13411	0.143317	0.185929	0.217665	IC1-flhC;IC4-dpiA	IC1-flhC,flhD;IC4-dpiA	mdh	144
IC1	mdh	flhC	0	0.0264373	0.0470145	0.161486	0.13411	0.143317	0.185929	0.217665	IC1-flhD;IC4-dpiA	IC1-flhC,flhD;IC4-dpiA	mdh	16
IC1	mglA	flhD	0	0.468625	2.11594	3.02799	3.20381	4.56284	4.58222	4.60072	C4-fis,IC1-flhC,galS	C4-fis,IC1-flhC,flhD,galS	mglAC;mglBAC	16
IC1	mglA	flhC	0	0.468625	2.11594	3.02799	3.20381	4.56284	4.58222	4.60072	C4-fis,IC1-flhD,galS	C4-fis,IC1-flhC,flhD,galS	mglAC;mglBAC	16
IC1	mglA	galS	0	0.468625	2.11594	3.02799	3.20381	4.56284	4.58222	4.60072	C4-fis,IC1-flhC,flhD	C4-fis,IC1-flhC,flhD,galS	mglAC;mglBAC	16
IC1	mglB	flhD	0	0.392483	1.76994	2.53139	2.77418	4.28393	4.19729	4.26034	IC1-flhC,galS	IC1-flhC,flhD,galS	mglBAC	16
IC1	mglB	flhC	0	0.392483	1.76994	2.53139	2.77418	4.28393	4.19729	4.26034	IC1-flhD,galS	IC1-flhC,flhD,galS	mglBAC	16
IC1	mglB	galS	0	0.392483	1.76994	2.53139	2.77418	4.28393	4.19729	4.26034	IC1-flhC,flhD	IC1-flhC,flhD,galS	mglBAC	16
IC1	mglC	flhD	0	0.322861	1.85383	2.57607	2.79617	3.88264	3.93276	3.95231	IC1-flhC,galS;C4-fis	IC1-flhC,flhD,galS;C4-fis	mglC;mglBAC;mglAC	24
IC1	mglC	flhC	0	0.322861	1.85383	2.57607	2.79617	3.88264	3.93276	3.95231	IC1-flhD,galS;C4-fis	IC1-flhC,flhD,galS;C4-fis	mglC;mglBAC;mglAC	24
IC1	mglC	galS	0	0.322861	1.85383	2.57607	2.79617	3.88264	3.93276	3.95231	IC1-flhC,flhD;C4-fis	IC1-flhC,flhD,galS;C4-fis	mglC;mglBAC;mglAC	24
IC1	mtlA	mtlR	0	0.214675	0.65204	1.10537	1.08613	1.96668	1.95887	1.97532	IC1-mtlR;C4-fis	IC1-mtlR;C4-fis	mtlADR	24
IC1	mtlD	mtlR	0	0.148972	0.215403	0.527774	0.485413	1.00596	0.925598	0.983246	IC1-mtlR;C4-fis	IC1-mtlR;C4-fis	mtlADR	24
IC1	mtlR	mtlR	0	0.178128	0.342172	0.491399	0.593023	1.12502	1.08952	1.08522	IC1-mtlR;C4-fis	IC1-mtlR;C4-fis	mtlADR	24
IC1	nagA	nagC	0	-0.0556769	-0.0333608	0.101052	0.0800773	0.405821	0.18161	0.329229		IC1-nagC	nagA;nagBACD	16
IC1	nagB	nagC	0	-0.100828	-0.0953064	-0.0573232	-0.071169	0.528043	0.493316	0.530855		IC1-nagC	nagBACD	16
IC1	nagC	nagC	0	-0.00961595	0.0738626	0.00680113	0.0475788	-0.00617859	0.0225992	-0.0305474		IC1-nagC	nagC;nagBACD	16
IC1	nagE	nagC	0	0.288411	0.495987	0.966341	1.02763	2.24518	2.12779	2.26762		IC1-nagC	nagE	16
IC1	nanC	nagC	0	0	0	0	0	0	0	0		IC1-nagC	nanCM;nanC	16
IC1	nanM	nagC	0	-0.0947158	-0.07428	-0.161376	-0.234904	0.224176	0.223294	0.15373		IC1-nagC	nanCM	16
IC1	nupC	cytR	0	0.145073	0.325766	0.741891	0.736962	0.462119	0.393909	0.556589		IC1-cytR	nupC	16
IC1	nupG	cytR	0	0.0112974	0.149269	0.114733	0.102295	1.45015	1.65032	1.70079		IC1-cytR	nupG;mutY-yggX-mltC-nupG;yggX-mltC-nupG	16
IC1	oxyR	oxyR	0	0.00428754	0.0915664	0.275781	0.117863	0.055025	0.0612084	0.0425415		IC1-oxyR	oxyR	16
IC1	pdhR	pdhR	0	0.00385456	0.228714	0.338208	0.309927	0.465224	0.47193	0.416715		IC1-pdhR	pdhR-aceEF-lpd	16
IC1	ppiA	cytR	0	0.171643	0.201236	0.149904	0.202672	0.137033	0.074259	0.0397513		IC1-cytR	ppiA	16
IC1	prpR	prpR	0	0.0266254	-0.229448	-0.320076	-0.357076	1.11609	0.962487	1.17221		IC1-prpR	prpR	16
IC1	ptsH	nagC	0	0.041912	0.0545777	0.170851	0.143541	0.218037	0.180463	0.26806		IC1-nagC	ptsHI-crr	16
IC1	rbsA	rbsR	0	0.858299	1.6663	2.11044	2.24987	3.43424	3.47159	3.43119		IC1-rbsR	rbsDACBKR	16
IC1	rbsB	rbsR	0	0.326969	0.856318	1.29973	1.45285	2.28102	2.26846	2.29053		IC1-rbsR	rbsDACBKR	16
IC1	rbsC	rbsR	0	0.883432	1.77746	2.14591	2.22995	3.24609	3.18175	3.19227		IC1-rbsR	rbsDACBKR	16
IC1	rbsD	rbsR	0	1.08679	2.15002	2.69656	2.92083	4.0112	4.10529	4.06244		IC1-rbsR	rbsDACBKR	16
IC1	rbsK	rbsR	0	0.215963	0.504713	0.817799	0.830606	1.56852	1.51162	1.59745		IC1-rbsR	rbsDACBKR	16
IC1	rbsR	rbsR	0	0.157084	0.377221	0.635771	0.581824	1.35098	1.21786	1.2638		IC1-rbsR	rbsDACBKR	16
IC1	rpoS	fur	0	-0.0200332	0.0658329	0.0640821	0.0286731	0.0183961	0.105165	0.0643894	IC1-fur;IC4-gadX	IC1-fur;IC4-gadX	rpoS;nlpD-rpoS	144
IC1	sodA	fur	0	-0.023611	-0.0158988	0.0171582	-0.0216892	-0.0467634	-0.0582624	-0.0865569	IC1-fur;C1-marA	IC1-fur;C1-marA	sodA	17
IC1	srlA	srlR	0	0	0	0.522896	0.47471	2.61916	2.72444	2.67516	IC1-srlR;C1-gutM	IC1-srlR;C1-gutM	srlAEBD-gutM-srlR-gutQ	17
IC1	srlB	srlR	0	0	0.16978	0.760308	0.928537	2.44232	2.35364	2.42897	IC1-srlR;C1-gutM	IC1-srlR;C1-gutM	srlAEBD-gutM-srlR-gutQ	17
IC1	srlD	srlR	0	0.128713	0.625803	0.986112	1.02564	2.23717	2.034	2.07343	IC1-srlR;C1-gutM	IC1-srlR;C1-gutM	srlAEBD-gutM-srlR-gutQ	17
IC1	srlE	srlR	0	0	1.10639	1.68782	1.80394	3.58864	3.72207	3.62941	IC1-srlR;C1-gutM	IC1-srlR;C1-gutM	srlAEBD-gutM-srlR-gutQ	17
IC1	srlR	srlR	0	-0.00920732	-0.0457755	0.0238381	0.0927988	0.211746	0.306432	0.40768	IC1-srlR;C1-gutM	IC1-srlR;C1-gutM	srlR;srlAEBD-gutM-srlR-gutQ	17
IC1	tam	lsrR	0	-0.106718	-0.247269	-0.337317	-0.404875	0.0902539	0.0933517	0.145239		IC1-lsrR	tam;lsrACDBFG-tam	16
IC1	tsx	cytR	0	0.211778	0.442978	0.627913	0.697567	0.794269	0.809627	0.946374		IC1-cytR	tsx	16
IC1	udp	cytR	0	0.081488	0.0804208	0.298955	0.0920986	0.580182	0.527306	0.683619		IC1-cytR	udp	16
IC1	uidA	uxuR	0	-0.0314441	0.219261	0.276513	0.284351	1.45969	1.52119	1.54748		IC1-uxuR	uidABC	16
IC1	uidB	uxuR	0	-0.0282083	-0.0282083	0.0887567	0.0156778	1.1567	1.1656	1.08285		IC1-uxuR	uidABC	16
IC1	uidC	uxuR	0	0.0732811	0.0638043	0.0313425	-0.0192329	0.391403	0.598556	0.34294		IC1-uxuR	uidC;uidABC	16
IC1	uxuA	uxuR	0	0.0547023	0.171232	0.27312	0.279483	1.45392	1.503	1.516	IC1-oxyR	IC1-uxuR,oxyR	uxuAB	16
IC1	uxuA	oxyR	0	0.0547023	0.171232	0.27312	0.279483	1.45392	1.503	1.516	IC1-uxuR	IC1-uxuR,oxyR	uxuAB	16
IC1	uxuB	uxuR	0	0.119086	0.177751	0.468609	0.413287	1.5845	1.51093	1.64589	IC1-oxyR	IC1-uxuR,oxyR	uxuAB	16
IC1	uxuB	oxyR	0	0.119086	0.177751	0.468609	0.413287	1.5845	1.51093	1.64589	IC1-uxuR	IC1-uxuR,oxyR	uxuAB	16
IC1	uxuR	uxuR	0	-0.0276739	0.0868672	0.206373	0.0487206	0.324792	0.317788	0.341861		IC1-uxuR	uxuR	16
IC1	xylA	araC	0	-0.0967641	-0.174563	-0.077304	-0.0776288	0.548762	0.565861	0.584118	IC1-araC;C1-xylR	IC1-araC;C1-xylR	xylAB	17
IC1	xylB	araC	0	-0.0913071	-0.199505	0.036156	-0.11708	0.333079	0.25367	0.326204	IC1-araC;C1-xylR	IC1-araC;C1-xylR	xylAB	17
IC2	bhsA	comR	0	-0.236048	-0.419455	-0.961951	-1.09403	-1.66482	-1.74049	-1.93552		IC2-comR	bhsA	32
IC2	cysG	fis	0	0.047264	0.0511634	0.162596	0.130178	0.0880086	-0.020836	0.0297027		IC2-fis	cysG;nirBDC-cysG	32
IC2	dusB	fis	0	0.0236667	0.00964779	-0.196839	-0.0759741	-0.0338351	-0.0477235	-0.0838062		IC2-fis	dusB-fis	32
IC2	fis	fis	0	0.0992977	0.0156698	-0.19613	-0.105903	-0.10677	-0.133226	-0.203104		IC2-fis	dusB-fis	32
IC2	gadA	fis	0	-0.523569	-0.822801	-1.31399	-1.49224	-1.43529	-1.46916	-1.42953	IC2-fis;C2-gadE,gadX	IC2-fis;C2-gadE,gadX	gadAX	34
IC2	gadB	fis	0	-0.450145	-0.731753	-1.21584	-1.29377	-1.29216	-1.32793	-1.28511	IC2-fis;C2-gadE,gadX	IC2-fis;C2-gadE,gadX	gadBC	34
IC2	gadC	fis	0	-0.545045	-0.751987	-1.28157	-1.47639	-1.43871	-1.38335	-1.37435	IC2-fis;C2-gadE,gadX	IC2-fis;C2-gadE,gadX	gadC;gadBC	34
IC2	gadX	fis	0	-0.237247	-0.310896	-0.522036	-0.586659	-0.318129	-0.333635	-0.382892	IC2-fis;C2-gadE,gadX	IC2-fis;C2-gadE,gadX	gadX;gadAX;gadXW	34
IC2	nirB	fis	0	-0.144462	-0.204046	-0.472126	-0.716862	-0.456722	-0.451471	-0.520836		IC2-fis	nirBDC-cysG	32
IC2	nirC	fis	0	0.0214535	-0.0611085	0.163327	0.0766044	0.327216	0.211436	0.197273		IC2-fis	nirBDC-cysG	32
IC2	nirD	fis	0	-0.0717002	-0.056667	-0.19033	-0.310066	-0.421476	-0.325814	-0.421476		IC2-fis	nirBDC-cysG	32
IC2	osmY	fis	0	-0.0928172	-0.161424	-0.21668	-0.269604	-0.477285	-0.548788	-0.563741		IC2-fis	osmY	32
IC2	yiaJ	yiaJ	0	0.0120543	-0.113782	0.0784899	0.00773296	-0.456818	-0.49058	-0.584467		IC2-yiaJ	yiaJ	32
IC3	araJ	araC	0	-0.115146	-0.208031	-0.302142	-0.444309	-0.908976	-0.867233	-0.917453		IC3-araC	araJ	64
IC3	dpiA	dcuR	0	0.0566244	-0.0510236	-0.0275697	-0.177436	-0.296932	-0.299471	-0.348719	IC3-dcuR;C2-dpiA	IC3-dcuR;C2-dpiA	dpiBA	66
IC3	dpiB	dcuR	0	0.021726	-0.0220306	0.0708021	-0.0893916	0.00294518	-0.209573	-0.211693	IC3-dcuR;C2-dpiA	IC3-dcuR;C2-dpiA	dpiBA	66
IC4	csgD	ompR	0	0.004729	0.134188	0.284552	0.282625	0.897882	0.905365	0.913164		IC4-ompR	csgDEFG	128
IC4	csgE	ompR	0	0.092868	0.147034	0.394054	0.374169	1.23657	1.12955	1.13349		IC4-ompR	csgDEFG	128
IC4	csgF	ompR	0	0.14539	0.277256	0.461495	0.469781	1.23864	1.15689	1.11793		IC4-ompR	csgDEFG	128
IC4	csgG	ompR	0	0.134573	0.210217	0.498841	0.415115	0.891246	0.855533	0.843124		IC4-ompR	csgG;csgDEFG	128
IC4	cyoA	gadE	0	0.0811829	0.190707	0.298533	0.286172	0.0254217	0.0138236	0.0245792	IC4-gadE;IC1-fur	IC4-gadE;IC1-fur	cyoABCDE	144
IC4	cyoB	gadE	0	0.14097	0.252471	0.410898	0.371377	0.0937497	0.0828111	0.1323	IC4-gadE;IC1-fur	IC4-gadE;IC1-fur,pdhR	cyoABCDE	144
IC4	cyoC	gadE	0	0.134459	0.245861	0.421507	0.415551	0.0793086	0.0856268	0.124863	IC4-gadE;IC1-fur	IC4-gadE;IC1-fur,pdhR	cyoABCDE	144
IC4	cyoD	gadE	0	0.16211	0.330576	0.561424	0.579468	0.200091	0.19395	0.218405	IC4-gadE;IC1-fur	IC4-gadE;IC1-fur,pdhR	cyoABCDE	144
IC4	cyoE	gadE	0	0.210256	0.342752	0.503084	0.566839	0.266823	0.252984	0.279932	IC4-gadE;IC1-fur	IC4-gadE;IC1-fur,pdhR	cyoE;cyoABCDE	144
IC4	exuT	dpiA	0	-0.0508181	-0.187069	-0.141326	-0.253587	0.871536	0.72719	0.797935		IC4-dpiA	exuT	128
IC4	glnG	fis	0	0.073136	0.171013	0.1989	0.150791	-0.00534185	0.0222429	-0.0424405		IC4-fis	glnALG;glnLG	128
IC4	glpA	fis	0	-0.0626238	-0.0626238	-0.0626238	-0.0415089	0.200701	0.0412801	0.00338441	IC4-fis;C1-flhC,flhD; IC1-glpR	IC4-fis;C1-flhC,flhD; IC1-glpR	glpABC	145
IC4	glpB	fis	0	-0.0570308	0.441292	0.731115	0.746685	0.993261	1.02972	0.939054	IC4-fis;C1-flhC,flhD; IC1-glpR	IC4-fis;C1-flhC,flhD; IC1-glpR	glpABC	145
IC4	glpC	fis	0	-0.0349472	-0.0722488	0.0331224	-0.17649	0.103633	0.0286261	-0.0283981	IC4-fis;C1-flhC,flhD; IC1-glpR	IC4-fis;C1-flhC,flhD; IC1-glpR	glpABC	145
IC4	glpQ	fis	0	0.0653573	0.211508	0.114424	-0.151495	0.101195	0.381387	0.0978235	IC4-fis;IC1-glpR	IC4-fis;IC1-glpR	glpTQ	144
IC4	glpT	fis	0	0.000577522	-0.0761801	-0.0941787	-0.106938	0.217529	0.0875844	0.149361	IC4-fis;IC1-glpR	IC4-fis;IC1-glpR	glpTQ	144
IC4	grcA	fis	0	0.0728577	0.109851	0.108839	0.112761	0.731808	0.867214	0.995893	IC4-fis;IC1-fur,pdhR	IC4-fis;IC1-fur,pdhR	grcA	144
IC4	hupA	fis	0	0.0580783	0.0838598	0.170176	0.0958686	0.041711	-0.0162977	-0.00089656		IC4-fis	hupA	128
IC4	lpd	fis	0	-0.00411116	-0.0133005	0.0886965	0.00631563	0.0402113	-0.0188617	0.0254055	IC4-fis;IC1-fur,pdhR	IC4-fis;IC1-fur,pdhR	lpd;pdhR-aceEF-lpd	144
IC4	malE	fis	0	0.151891	1.24475	1.89099	2.60914	6.12939	6.13736	6.20888	IC4-fis;C1-malT	IC4-fis;C1-malT	malEFG	129
IC4	malF	fis	0	-0.141283	0.21418	0.542157	0.894955	4.49895	4.50091	4.55996	IC4-fis;C1-malT	IC4-fis;C1-malT	malEFG	129
IC4	malG	fis	0	-0.0432112	0.119361	0.174973	0.35548	3.71969	3.67581	3.75698	IC4-fis;C1-malT	IC4-fis;C1-malT	malEFG	129
IC4	marA	fis	0	0.000269245	-0.0687603	-0.0808392	-0.0863422	-0.310561	-0.433222	-0.446601	IC4-fis;C1-marA;IC1-marR	IC4-fis;C1-marA;IC1-marR	marRAB	145
IC4	marB	fis	0	-0.0799731	-0.0087647	-0.183811	-0.172391	-0.520694	-0.401575	-0.570211	IC4-fis;C1-marA;IC1-marR	IC4-fis;C1-marA;IC1-marR	marRAB	145
IC4	marR	fis	0	0.050121	-0.0220543	-0.0753314	-0.0941748	-0.28777	-0.397224	-0.453246	IC4-fis;C1-marA;IC1-marR	IC4-fis;C1-marA;IC1-marR	marRAB	145
IC4	mazE	fis	0	-0.00964761	-0.086559	-2.3145e-05	0.00505209	0.0789113	-0.0726933	-0.00232685	IC4-fis;IC1-mazE	IC4-fis;IC1-mazE	mazEFG;relA-mazEF	144
IC4	mazF	fis	0	-0.0512414	-0.0391105	0.0361259	0.0050971	-0.0704307	-0.141671	0.00440882	IC4-fis;IC1-mazE	IC4-fis;IC1-mazE	mazEFG;relA-mazEF	144
IC4	mdh	dpiA	0	0.0264373	0.0470145	0.161486	0.13411	0.143317	0.185929	0.217665	IC4-dpiA;IC1-flhC,flhD	IC4-dpiA;IC1-flhC,flhD	mdh	144
IC4	nrdA	fis	0	0.032063	0.133939	0.285366	0.264608	0.485903	0.463746	0.499095		IC4-fis	nrdAB-yfaE	128
IC4	nrdB	fis	0	0.00138667	0.179394	0.411205	0.318541	0.368101	0.445491	0.512482		IC4-fis	nrdAB-yfaE	128
IC4	rpoS	gadX	0	-0.0200332	0.0658329	0.0640821	0.0286731	0.0183961	0.105165	0.0643894	IC4-gadX;IC1-fur	IC4-gadX;IC1-fur	rpoS;nlpD-rpoS	144
IC4	trg	fis										IC4-fis	trg	128
IC4	yfaE	fis	0	0.0304066	0.158343	0.264959	0.241969	0.333061	0.430715	0.377938		IC4-fis	yfaE;nrdAB-yfaE	128

## Sheet: CRP
Gene	B#	cAMP0	cAMP001	cAMP003	cAMP01	cAMP03	cAMP1	cAMP3	cAMP10
aceA	b4015	0	-0.0672377	-0.120038	-0.119549	-0.12073	-0.0743023	-0.0806676	-0.0136502
aceB	b4014	0	-0.337319	-0.336227	-0.344174	-0.151148	-0.0981787	-0.0635879	-0.0330497
aceE	b0114	0	0.302773	0.227386	0.286604	0.155932	0.201991	0.0371085	-0.00845148
aceF	b0115	0	0.406178	0.315243	0.385017	0.221817	0.218288	0.0301069	-0.0103878
aceK	b4016	0	-0.677644	-0.733521	-0.716618	-0.5393	-0.510698	-0.306314	-0.13869
acnA	b1276	0	0.188396	0.139177	0.2439	-0.187033	-0.138429	-0.230203	-0.13011
acnB	b0118	0	0.055148	-0.0430837	-0.00556026	0.356312	0.280844	0.0903117	-0.0343342
acs	b4069	0	4.02508	3.98837	3.87403	2.25205	2.01206	1.32528	0.291402
actP	b4067	0	5.31001	5.19104	5.03449	2.41852	2.16669	1.32562	0.278302
aer	b3072	0	-0.155621	-0.223382	0.00649211	-0.243208	-0.15394	-0.240041	-0.0831847
agaV	b3133	0	2.43453	2.42981	2.39195	0.373078	0.41133	0.280467	-0.0244877
agp	b1002	0	0	0	0	0	0	0	0
aldA	b1415	0	4.71825	4.56254	4.61755	3.69917	3.53639	2.73867	0.863044
aldB	b3588	0	3.26163	3.13944	3.04508	0.633148	0.441299	0.0982225	-0.0519866
ansB	b2957	0	0.116307	0.16796	0.189201	0.0223305	0.213659	0.0935693	0.124928
araA	b0062	0	0	0	0	0	0	0	0
araB	b0063	0	0	0	0	0	0	0	0
araC	b0064	0	1.33696	1.14229	1.35966	0.316141	0.31587	0.0185479	-0.0500674
araD	b0061	0	0	0	0	0	0	0	0
araE	b2841	0	0.159221	0.270151	0.146837	0.027269	0.0250967	0.0634437	0.027438
araF	b1901	0	2.57884	2.50646	2.58772	-0.0837372	-0.0653804	-0.0354366	-0.0892126
araG	b1900	0	0.887441	0.916368	0.988947	-0.0830465	-0.0356604	0.0168351	-0.0291045
araH	b4460
araJ	b0396	0	-0.917453	-0.867233	-0.908976	-0.444309	-0.302142	-0.208031	-0.115146
argG	b3172	0	-0.0792501	-0.0578672	-0.00392489	-0.239204	-0.431301	-0.143092	0.018298
aroA	b0908	0	-1.43425	-1.28656	-1.34638	-0.1059	-0.0588274	0.00380346	0.0484005
ascB	b2716	0	0.42835	0.396138	0.496223	-0.0454853	0.0479123	-0.0811052	-0.0306135
ascF	b2715	0	0.910658	0.951426	1.05073	0.202335	0.353153	0.197759	0.0754226
aspA	b4139	0	2.93139	2.9064	2.81086	0.392763	0.205845	0.154682	-0.110922
azuC	b4663	0	-2.47231	-1.91222	-2.02869	-0.721493	-0.633581	-0.141873	-0.122575
bglB	b3721	0	0	0	0	0	0	0	0
bglF	b3722	0	-0.110656	-0.299425	-0.370777	-0.0626406	0.053852	-0.079973	-0.0435978
bglG	b3723	0	0	0	0	0	0	0	0
caiA	b0039	0	0.0388934	0.10416	0.33086	0.0766408	0.138173	0.0273315	0.00139932
caiB	b0038	0	-0.0102681	0.103385	0.170889	-0.00210748	0.158366	0.104727	0.103659
caiC	b0037	0	-0.410518	-0.253394	-0.206453	-0.0642013	0.0949612	0.0352513	0.0477933
caiD	b0036	0	0.0238878	0.0476738	0.078452	0.0449534	0.160566	-0.0377495	0.00259764
caiE	b0035	0	0.107987	0.0965685	0.327461	-0.0394014	0.0891259	0.117088	0.0983872
caiF	b0034	0	0.209122	0.242386	0.436569	0.32965	0.246316	0.243503	0.282706
caiT	b0040	0	-0.0417511	-0.0417511	-0.0417511	-0.0417511	-0.0417511	-0.0417511	-0.0417511
cdd	b2143	0	1.68352	1.61201	1.58564	0.0992496	0.148095	0.291086	0.134892
chbA	b1736	0	0.105584	0.152537	0.172243	-0.0421738	-0.0130479	0.0664471	0.0160108
chbB	b1738	0	0.650794	0.709883	0.670023	0.0064332	-0.0118589	0.0648049	-0.0328187
chbC	b1737
chbF	b1734	0	-0.239592	-0.210776	-0.133659	-0.240364	-0.0553698	-0.223452	-0.0805766
chbG	b1733	0	-0.141749	-0.0484412	-0.0544635	-0.0476321	-0.0139109	0.0909407	-0.00768442
chbR	b1735	0	-0.213483	-0.137003	-0.16309	-0.278417	-0.136885	-0.0591644	-0.0906144
chpA	b2782	0	0.00440882	-0.141671	-0.0704307	0.0050971	0.0361259	-0.0391105	-0.0512414
chpR	b2783	0	-0.00232685	-0.0726933	0.0789113	0.00505209	-2.3145e-05	-0.086559	-0.00964761
cirA	b2155	0	0.36294	0.364159	0.471451	0.681721	0.599568	0.366036	0.167127
cpdB	b4213	0	1.11567	1.12735	1.21347	0.456771	0.444467	0.215309	0.00898286
crp	b3357	0	0.119853	0.0926535	0.143404	0.162126	0.174685	0.122839	0.0380987
crr	b2417	0	0.0185116	0.0445578	0.0601155	-0.0600229	-0.0408017	-0.0278922	-0.0228888
csgD	b1040	0	0.913164	0.905365	0.897882	0.282625	0.284552	0.134188	0.004729
csgE	b1039	0	1.13349	1.12955	1.23657	0.374169	0.394054	0.147034	0.092868
csgF	b1038	0	1.11793	1.15689	1.23864	0.469781	0.461495	0.277256	0.14539
csgG	b1037	0	0.843124	0.855533	0.891246	0.415115	0.498841	0.210217	0.134573
csiD	b2659	0	2.1774	2.10732	2.08193	0.82205	0.713809	0.43392	0.244214
csiE	b2535	0	2.00465	1.93232	1.89871	0.109232	0.0887813	-0.0773065	-0.117215
cstA	b0598	0	3.68733	3.60106	3.54369	1.88778	1.7587	1.05515	0.15431
cyaA	b3806	0	0	0	0	0	0	0	0
cyaR	b4438	0	1.8315	2.40324	1.90637	0.410479	0.304407	0.367482	-0.0920286
cyoA	b0432	0	0.0245792	0.0138236	0.0254217	0.286172	0.298533	0.190707	0.0811829
cyoB	b0431	0	0.1323	0.0828111	0.0937497	0.371377	0.410898	0.252471	0.14097
cyoC	b0430	0	0.124863	0.0856268	0.0793086	0.415551	0.421507	0.245861	0.134459
cyoD	b0429	0	0.218405	0.19395	0.200091	0.579468	0.561424	0.330576	0.16211
cyoE	b0428	0	0.279932	0.252984	0.266823	0.566839	0.503084	0.342752	0.210256
cysG	b3368	0	0.0297027	-0.020836	0.0880086	0.130178	0.162596	0.0511634	0.047264
cytR	b3934	0	0.537359	0.539251	0.589271	0.22467	0.218096	0.0688738	0.0229652
dadA	b1189	0	1.2237	1.07882	1.20423	0.572762	0.572605	0.215951	0.0612083
dadX	b1190	0	1.18452	1.05252	1.06723	0.497966	0.491886	0.157937	0.000398135
dctA	b3528	0	2.81554	2.78949	2.798	1.33532	1.13964	0.720317	0.0351628
dcuA	b4138	0	0.3854	0.43215	0.398549	0.274711	0.296887	0.202338	-0.0171315
dcuB	b4123	0	0.333525	0.44493	0.369866	-0.00750847	0.0450852	-0.00620128	0.00318543
dcuR	b4124	0	1.07348	1.06069	0.971001	0.0841989	0.167354	0.101187	-0.00676147
deoA	b4382	0	-0.0540504	-0.128886	-0.0651439	-0.405479	-0.369312	-0.238471	-0.0872332
deoB	b4383	0	-0.170485	-0.174797	-0.0891351	-0.420842	-0.359669	-0.192699	-0.107385
deoC	b4381	0	-0.320784	-0.286707	-0.290026	-0.453006	-0.336009	-0.245225	-0.149989
deoD	b4384	0	-0.0607169	-0.118498	-0.0611252	-0.250483	-0.228821	-0.212184	-0.0821991
dgsA	b1594	0	1.41391	1.30406	1.37792	0.331722	0.291098	0.0207109	-0.00112033
dksA	b0145	0	-0.0718308	-0.0857661	-0.0547601	-0.160228	-0.0633105	-0.10596	-0.0294719
dsdA	b2366	0	-0.272852	-0.184497	-0.0792524	-0.164027	0.0367271	-0.0419195	-0.0489516
dsdX	b2365
dusB	b3260	0	-0.0838062	-0.0477235	-0.0338351	-0.0759741	-0.196839	0.00964779	0.0236667
entA	b0596	0	-0.385522	-0.412614	-0.374364	0.343843	0.304601	0.184435	0.163897
entB	b0595	0	-0.40973	-0.45151	-0.355767	0.303684	0.332882	0.169437	0.117648
entC	b0593	0	-0.37068	-0.329211	-0.30406	0.1237	0.0352207	0.0612864	0.0580706
entD	b0583	0	-0.14504	-0.282157	-0.615791	0.386603	0.363616	0.134022	0.158714
entE	b0594	0	-0.327006	-0.3618	-0.38942	0.268479	0.257181	0.131182	0.0732032
entH	b0597	0	-0.479311	-0.556843	-0.400027	0.300255	0.235183	0.10867	0.143878
envZ	b3404	0	-0.142769	-0.16669	-0.160388	-0.0651881	0.0485401	0.00801911	-0.0209109
epd	b2927	0	0.83507	0.797081	0.899188	0.478588	0.465951	0.22686	0.0739948
exuT	b3093	0	0.797935	0.72719	0.871536	-0.253587	-0.141326	-0.187069	-0.0508181
fadD	b1805	0	2.79961	2.6877	2.61926	0.790621	0.762504	0.465978	0.138788
fadH	b3081	0	3.9181	3.83681	3.84008	1.62116	1.52019	0.979658	0.225874
fadL	b2344	0	2.58567	2.50931	2.40489	0.607111	0.461923	0.239936	-0.0595359
fbaA	b2925	0	0.0901489	0.051321	0.126529	0.0843125	0.0942172	0.0354177	0.0262729
feaR	b1384	0	3.27706	3.20979	3.27835	0.908408	0.848327	0.500029	0.13751
fecA	b4291	0	-0.825314	-0.730504	-0.713925	-0.390078	-0.304967	-0.161556	-0.0604734
fecB	b4290	0	-0.77214	-0.643872	-0.608372	-0.250928	-0.161435	-0.00688291	0.0390814
fecC	b4289	0	-0.864857	-0.918103	-0.863815	-0.45117	-0.370214	-0.210504	-0.021585
fecD	b4288	0	-0.629305	-0.469091	-0.391852	-0.336298	-0.224396	-0.104463	-0.0043008
fecE	b4287	0	-0.904766	-0.780706	-0.787284	-0.324381	-0.202055	-0.112299	0.0126254
fepA	b0584	0	0.133966	0.0414694	0.152098	0.510699	0.406817	0.24294	0.150478
fis	b3261	0	-0.203104	-0.133226	-0.10677	-0.105903	-0.19613	0.0156698	0.0992977
fiu	b0805	0	0.190287	0.0770498	0.0256918	0.806335	0.710289	0.425589	0.24627
fixA	b0041	0	0.00923995	0.0199325	0.156685	0	0	0	0
fixB	b0042	0	0.0322046	0.187765	0.157516	0	0.0294249	0	0
fixC	b0043	0	0	0.0469198	0.0220021	0	0	0	0
fixX	b0044	0	0	0	0	0	0	0	0
flhC	b1891	0	1.71722	1.69479	1.73356	1.08261	1.01928	0.658548	0.219578
flhD	b1892	0	1.84754	1.76121	1.85535	1.0804	0.992584	0.658785	0.229676
focA	b0904	0	0.109483	0.16126	0.129973	-0.377035	-0.240459	-0.173285	-0.12441
focB	b2492	0	-0.220844	-0.0659933	-0.117789	-0.0570206	0.108687	0.0456389	0.0564176
fucA	b2800	0	2.06745	1.82132	1.7434	0.427049	0.432207	0.156023	-0.0733893
fucI	b2802	0	0.949055	1.07532	1.01766	0.0897081	0.0922656	0.0668938	-0.011937
fucK	b2803		0.694842	0.744168	0.724348	-0.0345793	0.139775	0.000891403	0.0990423
fucO	b2799	0	2.86484	2.83502	2.83254	0.755779	0.75064	0.503059	0.167431
fucP	b2801	0	0.804346	0.641643	0.800645	0	0	0	0
fucR	b2805	0	1.37018	1.36962	1.33564	0.459057	0.480958	0.263035	0.0180974
fucU	b2804	0	0.0125183	0.00342917	0.0790393	0.301117	0.388521	0.174664	-0.0015542
fumA	b1612	0	1.36996	1.29775	1.30574	0.52663	0.523488	0.310939	0.112268
fumB	b4122	0	0.0458455	0.0491693	0.230122	-0.0431608	0.147871	0.0995365	-0.0305988
fur	b0683	0	-0.101282	-0.109564	-0.114819	-0.0743666	-0.0906373	-0.0712505	-0.0230411
gabD	b2661	0	1.01339	0.946198	0.935208	0.220318	0.190183	0.0707085	0.0733405
gabP	b2663	0	1.36802	1.37767	1.2848	0.572558	0.559798	0.403571	0.208741
gabT	b2662	0	1.1321	1.05137	1.04578	0.420883	0.420263	0.185935	0.088501
gadA	b3517	0	-1.42953	-1.46916	-1.43529	-1.49224	-1.31399	-0.822801	-0.523569
gadB	b1493	0	-1.28511	-1.32793	-1.29216	-1.29377	-1.21584	-0.731753	-0.450145
gadC	b1492	0	-1.37435	-1.38335	-1.43871	-1.47639	-1.28157	-0.751987	-0.545045
gadE	b3512	0	-1.4717	-1.47296	-1.43014	-1.4478	-1.31975	-0.82958	-0.514313
gadX	b3516	0	-0.382892	-0.333635	-0.318129	-0.586659	-0.522036	-0.310896	-0.237247
galE	b0759	0	0.0657109	0.076409	0.13739	-0.0154936	0.0175766	-0.000716625	0.0201706
galK	b0757	0	0.50409	0.473911	0.571442	0.117349	0.097459	0.0282092	0.00084889
galM	b0756	0	-0.0271492	-0.0124301	0.0253625	-0.0731689	-0.0406161	-0.0322374	-0.014755
galP	b2943	0	-2.22808	-2.13402	-2.07219	-0.535693	-0.363645	-0.333127	-0.159515
galS	b2151	0	0.94167	0.906801	0.895066	-0.311939	-0.253931	-0.0542875	-0.00764748
galT	b0758	0	0.223576	0.213396	0.297438	0.0427449	0.0941186	0.0651333	0.0495514
gapA	b1779	0	-0.00048204	-0.0060504	-0.0372715	0.119822	0.156084	0.0639267	0.0376562
gatA	b2094	0	4.36247	4.34634	4.34448	3.95872	3.84477	3.39351	1.48727
gatB	b2093	0	5.91521	5.91947	5.82309	5.35593	5.11711	4.48387	1.79896
gatC	b2092	0	4.916	4.91779	4.92326	4.44417	4.22317	3.83298	1.43927
gatD	b2091	0	6.60465	6.40143	6.52819	5.86165	5.61212	4.65071	1.79571
gatY	b2096	0	2.82699	2.83475	2.78445	2.57111	2.49632	2.07936	0.938972
gatZ	b2095	0	3.45935	3.40449	3.37961	3.07569	3.01856	2.59426	1.05598
gcd	b0124		-0.945257	-0.947646	-0.908587	-1.09254	-0.94316	-0.503999	-0.21798
gdhA	b1761	0	-0.251663	-0.229175	-0.210357	0.294442	0.293847	0.174537	0.0543976
glcC	b2980	0	1.58408	1.51728	1.52317	0.303424	0.351499	0.190473	0.117194
glgA	b3429	0	0.220583	0.206097	0.256696	-0.0265592	0.034752	-0.088976	-0.0538863
glgC	b3430	0	0.391468	0.333795	0.399175	0.0865624	0.0954551	-0.0568678	-0.0499049
glgP	b3428	0	0.249362	0.152933	0.2412	-0.0562245	-0.0421155	-0.105819	-0.065003
glgS	b3049	0	0.691243	0.755184	0.695942	0.191711	0.168353	0.0776177	-0.062175
glnA	b3870	0	-0.0991996	-0.101367	-0.0478893	0.110848	0.0883791	0.0570137	0.0406589
glnG	b3868	0	-0.0424405	0.0222429	-0.00534185	0.150791	0.1989	0.171013	0.073136
glnL	b3869	0	-0.268435	-0.300212	-0.366206	-0.0270294	0.0594814	0.037937	0.00628097
glpA	b2241	0	0.00338441	0.0412801	0.200701	-0.0415089	-0.0626238	-0.0626238	-0.0626238
glpB	b2242	0	-0.0283981	0.0286261	0.103633	-0.17649	0.0331224	-0.0722488	-0.0349472
glpC	b2243	0	0.0978235	0.381387	0.101195	-0.151495	0.114424	0.211508	0.0653573
glpD	b3426	0	0.434178	0.50793	0.459471	-0.00396871	0.0898278	0.0561103	0.0142091
glpE	b3425	0	-0.237179	-0.215173	-0.186578	0.113337	0.157007	0.0477799	-0.00830549
glpF	b3927	0	1.58066	1.55814	1.55224	0.107651	0.170823	0.00847217	-0.000347526
glpG	b3424	0	-0.508203	-0.452704	-0.371164	-0.0524441	-0.0171775	-0.0202219	0.0308415
glpK	b3926	0	1.37683	1.29402	1.31468	0.0662296	0.167435	0.0301236	-0.0227419
glpQ	b2239	0	0.149361	0.0875844	0.217529	-0.106938	-0.0941787	-0.0761801	0.000577522
glpR	b3423	0	-0.489658	-0.513709	-0.364112	-0.102573	-0.0614636	-0.0301322	0.030037
glpT	b2240	0	0.995893	0.867214	0.731808	0.112761	0.108839	0.109851	0.0728577
glpX	b3925	0	-0.234318	-0.303369	-0.221279	-0.315868	-0.124607	-0.176383	-0.0145243
gltA	b0720	0	0.775884	1.05223	0.758504	0.690439	0.565219	0.587475	-0.0171874
gltB	b3212	0	-0.387137	-0.481911	-0.337164	0.32699	0.385044	0.213675	0.164644
gltD	b3213	0	-0.45676	-0.587146	-0.533763	0.417164	0.452254	0.170438	0.188953
gltF	b3214	0	-0.585803	-0.494149	-0.291248	0.838925	0.833866	0.577754	0.370358
gntK	b3437	0	0.536563	0.595343	0.431029	0.117311	0.177466	0.0202336	-0.106292
gntP	b4321	0	2.46551	2.40418	2.33767	0.545594	0.620632	0.253694	0.0440916
gntT	b3415	0	0.77022	0.795228	0.750193	0.140112	0.206229	0.121596	-0.016931
gntU	b4476
gntX	b3413	0	-0.0439921	-0.115512	-0.0125039	0.098357	0.180272	-0.00564453	-0.0335677
grpE	b2614	0	-0.341909	-0.302391	-0.141684	0.0653203	0.16959	0.0508689	0.0144347
guaA	b2507	0	-1.12437	-1.17872	-1.07256	-0.419383	-0.385483	-0.219707	0.0449747
guaB	b2508	0	-1.301	-1.2486	-1.20619	-0.568746	-0.491549	-0.211688	0.0641495
gutM	b2706	0	0.274875	0.375063	0.242314	0.0150983	0.107651	0.0495753	-0.0382281
gutQ	b2708	0	0.207504	0.288648	0.261343	0.0936142	0.220328	0.139822	0.00446967
gyrA	b2231	0	-0.44341	-0.481894	-0.470094	-0.0829659	0.031788	-0.054086	0.0465362
hlyE	b1182	0	1.13725	1.2668	1.23093	-0.20323	-0.0593539	0.00742827	0.0191808
hofB	b0107	0	-0.25578	-0.115934	-0.167958	-0.0104075	0.16193	0.146949	0.0700307
hofC	b0106	0	-0.298059	-0.185242	-0.187465	-0.192823	-0.0268595	-0.0755463	-0.0224604
hofM	b3395	0	-0.289937	-0.287041	-0.208457	-0.144061	0.045358	-0.0296583	-0.0347691
hofN	b3394	0	-0.153846	-0.0694053	0.0744298	-0.0775169	-0.0636558	-0.0204611	0.0131249
hofO	b3393	0	-0.0618023	-0.0145019	0.0338754	-0.0246346	0.0584059	0.0322199	-0.0163755
hofP	b3392	0	-0.0355175	0.0647378	0.126457	0.12914	0.073835	0.0590149	0.119783
hpt	b0125	0	-0.325252	-0.337874	-0.323783	-0.12515	-0.132615	-0.0356571	-0.0419325
hupA	b4000	0	-0.00089656	-0.0162977	0.041711	0.0958686	0.170176	0.0838598	0.0580783
hupB	b0440	0	0.591182	0.437913	0.482044	0.228952	0.422353	-0.0492149	0.0265346
hyfA	b2481	0	0	0	0	0	0	0	0
hyfB	b2482	0	-0.0234413	-0.0520153	0.0759359	0.035391	0.0159454	-0.0108535	0.0746289
hyfC	b2483	0	0	0	0	0	0	0	0
hyfD	b2484	0	0	0	0	0	0	0	0
hyfE	b2485	0	-0.0892922	-0.158636	-0.0773424	0.054071	-0.0030281	-0.0321551	0.0574347
hyfF	b2486	0	-0.0903083	-0.139572	-0.0130548	-0.0330432	0.035593	-0.0360852	-0.0749019
hyfG	b2487	0	-0.22151	-0.118477	-0.226034	-0.194149	-0.129304	-0.0417437	-0.0177721
hyfH	b2488	0	-0.647767	-0.452895	-0.379292	-0.267392	-0.12173	-0.0755268	0.0433484
hyfI	b2489	0	-0.46586	-0.45763	-0.300367	-0.365658	-0.237244	-0.199158	0.0291385
hyfJ	b2490	0	-0.392401	-0.262272	-0.302014	-0.220077	-0.157401	-0.0253349	-0.0228019
hyfR	b2491	0	-0.283397	-0.228157	-0.180046	-0.338449	-0.261196	-0.169977	-0.142666
idnD	b4267	0	2.85955	2.81569	2.85361	0.895427	0.912181	0.352079	0
idnK	b4268	0	1.31118	1.31608	1.29831	0.2464	0.315822	0.134704	-0.0516323
idnO	b4266	0	2.03429	2.23001	2.25654	0.742572	0.839802	0.4115	-0.0669203
idnR	b4264	0	-0.131208	-0.144849	-0.12647	0.013804	0.11088	0.0191025	-0.00891672
idnT	b4265	0	0.410584	0.3536	0.357907	-0.0480451	0.075047	0.0372231	-0.0848162
ilvB	b3671	0	0.559722	0.525765	0.590172	0.567171	0.50382	0.354449	0.252731
ilvN	b3670	0	0.683301	0.765276	0.655768	0.724634	0.727756	0.563049	0.299512
infB	b3168	0	-0.157322	-0.14495	-0.131148	-0.10329	-0.110317	-0.0576563	0.013965
ivbL	b3672	0	0.614479	0.642515	0.63927	0.494263	0.472976	0.300942	0.169941
kbaZ	b3132	0	1.97507	1.97877	1.97517	0.215983	0.235361	0	0
lacA	b0342	0	0.0386565	0.229166	0.0909533	-0.0355108	0.0932468	0.0486077	0.0412153
lacY	b0343
lacZ	b0344	0	0	0	0	0	0	0	0
lamB	b4036	0	5.46193	5.31401	5.39897	1.57595	0.991264	0.434265	-0.137344
lhgO	b2660	0	2.21619	2.13594	2.20435	0.861949	0.872437	0.499224	0.256932
lpd	b0116	0	0.0254055	-0.0188617	0.0402113	0.00631563	0.0886965	-0.0133005	-0.00411116
lsrA	b1513	0	1.52901	1.45907	1.40397	0.340743	0.401414	0.217922	0.105703
lsrB	b1516	0	1.5227	1.45091	1.66577	0.325476	0.416266	0.173966	0.0347573
lsrC	b1514	0	1.04378	1.06138	1.15972	0.179156	0.246307	0.0592534	-0.0213362
lsrD	b1515	0	1.03045	1.18261	1.0868	0.0983041	0.279824	0.169709	0.083703
lsrF	b1517	0	1.21834	1.24889	1.25191	0.0777589	0.118031	0.00497243	-0.00461787
lsrG	b1518	0	1.0212	1.11188	1.034	-0.0370064	0.0255693	-0.0221881	0.00144103
lsrK	b1511	0	1.60304	1.59565	1.57333	0.338916	0.335059	0.17382	-0.0019549
lsrR	b1512	0	1.30424	1.17467	1.32023	0.287042	0.275004	-0.0307404	-0.0595314
lyxK	b3580	0	0	0.0277794	0.157791	0	0	0	0
malE	b4034	0	6.20888	6.13736	6.12939	2.60914	1.89099	1.24475	0.151891
malF	b4033	0	4.55996	4.50091	4.49895	0.894955	0.542157	0.21418	-0.141283
malG	b4032	0	3.75698	3.67581	3.71969	0.35548	0.174973	0.119361	-0.0432112
malI	b1620	0	0.966571	0.978399	0.874971	0.292893	0.335169	0.14707	0.01165
malK	b4035	0	6.08143	6.03023	5.97527	1.464	0.881986	0.264783	0
malM	b4037	0	4.47946	4.51441	4.50436	0.996889	0.658931	0.396376	-0.0898048
malS	b3571	0	0.673741	0.730865	0.533891	0.134412	0.136671	0.107164	0.103445
malT	b3418	0	3.76319	3.71476	3.58582	1.56541	1.5163	1.00227	0.244252
malX	b1621	0	1.34006	1.19273	1.18897	0.364533	0.354361	0.196121	0.00828559
malY	b1622	0	0.202176	0.328897	0.290463	0.14897	0.222742	0.157686	0.00477061
manX	b1817	0	2.48463	2.45663	2.4604	1.30126	1.26695	0.69656	-0.0536591
manY	b1818	0	2.39664	2.30034	2.28248	1.1836	1.09215	0.613241	0.0151261
manZ	b1819	0	2.51234	2.39665	2.40522	1.21971	1.08889	0.54193	0.00240085
marA	b1531	0	-0.446601	-0.433222	-0.310561	-0.0863422	-0.0808392	-0.0687603	0.000269245
marB	b1532	0	-0.570211	-0.401575	-0.520694	-0.172391	-0.183811	-0.0087647	-0.0799731
marR	b1530	0	-0.453246	-0.397224	-0.28777	-0.0941748	-0.0753314	-0.0220543	0.050121
mdh	b3236	0	0.217665	0.185929	0.143317	0.13411	0.161486	0.0470145	0.0264373
mdtE	b3513	0	-1.86631	-1.81123	-1.72152	-1.50406	-1.27392	-0.864716	-0.536269
mdtF	b3514	0	-1.79164	-1.61214	-1.58038	-1.37007	-1.16685	-0.774806	-0.544961
melA	b4119	0	1.72573	1.57537	1.73436	0.0503436	0.0895549	0.00222623	-0.0478119
melB	b4120	0	0.799962	0.735962	0.72072	-0.309309	-0.136153	-0.120643	-0.108135
melR	b4118	0	0.957322	0.944007	0.925345	-0.055394	0.00830225	-0.0556798	-0.0686574
metK	b2942	0	0.405046	0.374173	0.419525	-0.120379	-0.166608	-0.206609	-0.188347
metY	b3171
mglA	b2149	0	4.60072	4.58222	4.56284	3.20381	3.02799	2.11594	0.468625
mglB	b2150	0	4.26034	4.19729	4.28393	2.77418	2.53139	1.76994	0.392483
mglC	b2148	0	3.95231	3.93276	3.88264	2.79617	2.57607	1.85383	0.322861
mhpA	b0347	0	-0.301485	-0.268575	-0.09914	-0.422302	-0.340293	-0.113331	0.00550742
mhpB	b0348	0	-0.436216	-0.33834	-0.215904	-0.28107	-0.204392	-0.03853	0.052068
mhpC	b0349	0	-0.0629355	-0.095799	-0.103863	0.00421787	-0.0177956	-0.0511952	-0.03814
mhpD	b0350	0	0.304387	0.28076	0.378815	0.317908	0.341498	0.0571128	0.0968761
mhpE	b0352	0	0.327502	0.288408	0.431224	0.322356	0.365016	0.164248	0.13
mhpF	b0351	0	0.213904	0.217377	0.280008	0.274435	0.308028	0.120135	0.0773001
modA	b0763	0	0.415945	0.339245	0.486121	0.248023	0.344418	0.131492	0.0764873
modB	b0764	0	0.532358	0.529804	0.461408	0.177377	0.277041	0.188028	0.109489
modC	b0765	0	0.112953	0.150822	0.158835	-0.0220296	-0.0072206	0.0490375	0.0130169
mpl	b4233	0	0.0114682	0.0516352	0.0398623	0.0826916	0.175409	-0.0110516	-0.0229814
mtlA	b3599	0	1.97532	1.95887	1.96668	1.08613	1.10537	0.65204	0.214675
mtlD	b3600	0	0.983246	0.925598	1.00596	0.485413	0.527774	0.215403	0.148972
mtlR	b3601	0	1.08522	1.08952	1.12502	0.593023	0.491399	0.342172	0.178128
murP	b2429	0	0	0	0	0	0	0	0
murQ	b2428	0	0.198744	0.186258	0.333795	0.125617	0.205723	0.0381643	0.0796074
nagA	b0677	0	0.329229	0.18161	0.405821	0.0800773	0.101052	-0.0333608	-0.0556769
nagB	b0678	0	0.530855	0.493316	0.528043	-0.071169	-0.0573232	-0.0953064	-0.100828
nagC	b0676	0	-0.0305474	0.0225992	-0.00617859	0.0475788	0.00680113	0.0738626	-0.00961595
nagD	b0675	0	-0.104783	-0.09861	-0.0544711	0.098349	0.123189	0.0628088	0.0105914
nagE	b0679	0	2.26762	2.12779	2.24518	1.02763	0.966341	0.495987	0.288411
nanA	b3225	0	2.75474	2.69406	2.69207	0.916596	0.79518	0.502959	0.118794
nanC	b4311	0	0	0	0	0	0	0	0
nanE	b3223	0	0.932255	0.953068	0.898548	0.0945753	0.134011	0.104422	-0.0432995
nanK	b3222	0	0.772395	0.778266	0.814079	0.10207	0.102913	0.0491214	-0.0309385
nanM	b4310	0	0.15373	0.223294	0.224176	-0.234904	-0.161376	-0.07428	-0.0947158
nanT	b3224	0	1.6433	1.57228	1.53198	0.164834	0.23057	0.113574	-0.0123381
nfuA	b3414	0	-0.262309	-0.311975	-0.315686	-0.111148	-0.103833	-0.05728	-0.0180622
nirB	b3365	0	-0.520836	-0.451471	-0.456722	-0.716862	-0.472126	-0.204046	-0.144462
nirC	b3367	0	0.197273	0.211436	0.327216	0.0766044	0.163327	-0.0611085	0.0214535
nirD	b3366	0	-0.421476	-0.325814	-0.421476	-0.310066	-0.19033	-0.056667	-0.0717002
nrdA	b2234	0	0.499095	0.463746	0.485903	0.264608	0.285366	0.133939	0.032063
nrdB	b2235	0	0.512482	0.445491	0.368101	0.318541	0.411205	0.179394	0.00138667
nupC	b2393	0	0.556589	0.393909	0.462119	0.736962	0.741891	0.325766	0.145073
nupG	b2964	0	1.70079	1.65032	1.45015	0.102295	0.114733	0.149269	0.0112974
nusA	b3169	0	-0.268851	-0.236892	-0.215725	-0.153964	-0.157832	-0.0802166	-0.00795036
ompA	b0957	0	0.047645	0.0237921	0.0564744	0.0177948	0.0300452	-0.00520297	0.00296198
ompF	b0929	0	1.8676	1.82502	1.85164	1.3946	1.21598	0.885495	0.312851
ompR	b3405	0	-0.223485	-0.188125	-0.207583	-0.0348159	0.0232212	0.070129	-0.00696446
osmY	b4376	0	-0.563741	-0.548788	-0.477285	-0.269604	-0.21668	-0.161424	-0.0928172
oxyR	b3961	0	0.0425415	0.0612084	0.055025	0.117863	0.275781	0.0915664	0.00428754
paaA	b1388	0	1.92177	1.98531	2.02146	0.444585	0.384268	0.106949	0
paaB	b1389	0	1.79388	1.84637	1.69689	0.499912	0.455423	0.0264291	0
paaC	b1390	0	2.05088	2.09042	2.13907	0.763533	0.760577	0.422256	0.206239
paaD	b1391	0	1.56721	1.50854	1.78097	0.50255	0.481144	0.254889	0.113924
paaE	b1392	0	1.20845	1.28432	1.34747	0.398651	0.441112	0.248949	-0.000984553
paaF	b1393	0	1.08974	0.984061	1.08106	0.296655	0.352824	0.14336	0.0887658
paaG	b1394	0	0.872591	0.809682	1.04059	0.266305	0.312426	0.0512938	-0.0190328
paaH	b1395	0	0.749285	0.662564	0.752316	0.147841	0.222615	0.153245	0.0372202
paaI	b1396	0	0.389279	0.402261	0.510757	0.096803	0.181473	0.0916254	-0.0295391
paaJ	b1397	0	0.771369	0.765766	0.937761	0.281198	0.211795	0.0301448	0.0299425
paaK	b1398	0	1.76524	1.69634	1.73843	0.163319	0.174923	-0.0137464	-0.0668066
paaZ	b1387	0	0	0	0.0146165	0	0	0	0
pdhR	b0113	0	0.416715	0.47193	0.465224	0.309927	0.338208	0.228714	0.00385456
pflB	b0903	0	-0.117892	-0.164699	-0.120674	-0.192851	-0.160858	-0.110836	-0.0828817
pgk	b2926	0	0.276988	0.259185	0.315333	0.154443	0.147572	0.0605427	0.00174731
pncB	b0931	0	-0.688214	-0.597705	-0.616059	-0.126125	-0.0683439	0.0155556	0.0165985
pnp	b3164	0	0.155331	0.126209	0.172431	-0.0297778	-0.00055709	-0.0240411	0.00123024
ppdD	b0108	0	-0.081044	-0.0469131	-0.0854989	-0.0886005	0.0323354	0.0724084	0.0459701
ppiA	b3363	0	0.0397513	0.074259	0.137033	0.202672	0.149904	0.201236	0.171643
preA	b2147	0	1.48681	1.5271	1.6537	0.194211	0.349787	0.128331	-0.1211
preT	b2146	0	2.02089	2.19722	2.23371	0.81524	0.704965	0.433705	0.15551
proP	b4111	0	-1.5508	-1.59813	-1.4561	-0.763002	-0.542736	-0.339443	-0.143344
prpB	b0331	0	0.997208	0.738259	0.779073	-0.192284	-0.262913	-0.152306	-0.031182
prpC	b0333	0	1.0818	1.17062	1.05026	-0.217529	-0.0976492	-0.109084	0.0918002
prpD	b0334	0	1.10832	1.07125	1.01116	0	0	0	0
prpE	b0335	0	0.861607	0.772688	0.749962	-0.0070531	-0.0344146	0.194106	0.143616
prpR	b0330	0	1.17221	0.962487	1.11609	-0.357076	-0.320076	-0.229448	0.0266254
psiE	b4030	0	-2.78766	-2.66633	-2.49646	-0.985927	-0.774845	-0.449902	-0.168689
ptsG	b1101	0	1.43474	1.39965	1.38534	0.706319	0.633523	0.401291	0.0938082
ptsH	b2415	0	0.26806	0.180463	0.218037	0.143541	0.170851	0.0545777	0.041912
ptsI	b2416	0	0.37808	0.341968	0.335283	0.147687	0.145392	0.0709328	0.0413027
putP	b1015	0	0.454529	0.305694	0.439133	0.169239	0.174722	0.0637651	0.16184
rbfA	b3167	0	-0.0584769	-0.0608907	-0.0335604	-0.0370585	0.0327769	0.0518667	0.0797693
rbsA	b3749	0	3.43119	3.47159	3.43424	2.24987	2.11044	1.6663	0.858299
rbsB	b3751	0	2.29053	2.26846	2.28102	1.45285	1.29973	0.856318	0.326969
rbsC	b3750	0	3.19227	3.18175	3.24609	2.22995	2.14591	1.77746	0.883432
rbsD	b3748	0	4.06244	4.10529	4.0112	2.92083	2.69656	2.15002	1.08679
rbsK	b3752	0	1.59745	1.51162	1.56852	0.830606	0.817799	0.504713	0.215963
rbsR	b3753	0	1.2638	1.21786	1.35098	0.581824	0.635771	0.377221	0.157084
relA	b2784	0	0.270385	0.156038	0.232364	0.0489296	0.0667803	-0.0274554	0.00135505
rhaA	b3903	0	0	0	0	0	0	0	0
rhaB	b3904	0	0	0	0	0	0	0	0
rhaD	b3902	0	0	0	0	0	0	0	0
rhaR	b3906	0	0.781159	0.849301	0.877305	-0.0878107	0.0498436	0.0139965	-0.0314846
rhaS	b3905	0	0	0	0	0	0	0	0
rhaT	b3907	0	0.381305	0.457574	0.502894	-0.0760662	0.136187	0.0303752	-0.00724739
rimP	b3170	0	-0.473137	-0.453702	-0.383661	-0.263436	-0.207998	-0.183591	-0.0612107
rpoH	b3461	0	-0.190558	-0.131803	-0.156481	-0.0504219	-0.0108344	0.00984677	-0.0988905
rpoS	b2741	0	0.0643894	0.105165	0.0183961	0.0286731	0.0640821	0.0658329	-0.0200332
rpsO	b3165	0	-0.275978	-0.225391	-0.227514	-0.0392918	-0.033422	0.0427133	0.0366228
sbmC	b2009	0	0.338009	0.288492	0.346512	-0.219716	-0.1613	-0.187868	-0.0707772
sdhA	b0723	0	1.84591	1.81906	1.84431	1.73623	1.63629	1.31578	0.661381
sdhB	b0724	0	1.71392	1.69902	1.69084	1.72492	1.55126	1.24164	0.67827
sdhC	b0721	0	1.88659	1.86848	1.87142	1.74441	1.64337	1.33095	0.697669
sdhD	b0722	0	1.84968	1.8121	1.80916	1.68579	1.626	1.2354	0.647055
serA	b2913	0	-0.798048	-0.738839	-0.690005	-0.00452653	0.0180472	0.0452185	0.0707671
serC	b0907	0	-0.7594	-0.775206	-0.730862	0.00683211	0.061393	0.0343637	0.065203
sfsA	b0146	0	0.0197823	0.0334531	0.092895	-0.12802	-0.111135	-0.0375559	0.000245945
sgbE	b3583	0	-0.0234727	-0.0352677	0.060746	-0.127137	0.0512456	0.0295098	0.0777673
sgbH	b3581	0	0.14247	0.0359095	0.127561	0.0916544	0.177792	0.0107904	0.0160577
sgbU	b3582	0	-0.029674	0.00613414	0.220497	0.000978379	-0.00354646	-0.024305	0.0597535
sodA	b3908	0	-0.0865569	-0.0582624	-0.0467634	-0.0216892	0.0171582	-0.0158988	-0.023611
sodB	b1656	0	-0.286234	-0.272982	-0.257561	0.202744	0.243791	0.150877	0.0882004
sohB	b1272	0	-0.385986	-0.401926	-0.337128	0.0290225	0.010167	-0.00655561	-0.00370215
speC	b2965	0	-0.162369	-0.215091	-0.113823	0.195074	0.197386	0.124032	0.156372
spf	b3864	0	-1.0661	-0.505451	-0.789313	-0.115755	-0.175009	-0.0230312	-0.138508
srlA	b2702	0	2.67516	2.72444	2.61916	0.47471	0.522896	0	0
srlB	b2704	0	2.42897	2.35364	2.44232	0.928537	0.760308	0.16978	0
srlD	b2705	0	2.07343	2.034	2.23717	1.02564	0.986112	0.625803	0.128713
srlE	b2703
srlR	b2707	0	0.40768	0.306432	0.211746	0.0927988	0.0238381	-0.0457755	-0.00920732
sucA	b0726	0	0.937934	0.880054	0.928998	1.12681	1.15166	0.82405	0.432134
sucB	b0727	0	0.710186	0.679035	0.708898	0.87469	0.844737	0.586141	0.331922
sucC	b0728	0	1.017	0.967254	1.03304	1.1455	1.13782	0.793121	0.394855
sucD	b0729	0	1.068	1.06568	1.09164	1.14839	1.12677	0.82397	0.372592
tam	b1519	0	0.145239	0.0933517	0.0902539	-0.404875	-0.337317	-0.247269	-0.106718
tdcA	b3118	0	0.397147	0.224134	0.379139	0	0	0	0
tdcB	b3117	0	0.248551	0.391369	0.283696	0	0	0	0
tdcC	b3116	0	0.171386	0.268545	0.256783	0.0749746	0.132307	0.056209	-0.045088
tdcD	b3115	0	0.271999	0.343178	0.427936	0.0446961	0.161925	0.0533661	0.043441
tdcE	b3114	0	0.174899	0.214784	0.242547	0.105287	0.107441	0.0751576	-0.0220733
tdcF	b3113	0	-0.0655698	-0.0196676	0.112346	-0.044422	0.0157905	-0.0281005	0.0650003
tdcG	b4471
tnaA	b3708	0	4.97569	4.87331	4.82756	1.43422	1.06588	0.37378	0
tnaB	b3709	0	2.22339	2.18323	2.14914	0	0	0	0
tnaC	b3707	0	2.82945	3.01746	2.83107	0	0	0	0
treB	b4240	0	1.41534	1.41322	1.21519	0.259916	0.300299	0.114548	0.0342243
treC	b4239	0	1.11376	1.22487	1.32682	0.212259	0.266448	0.182033	-0.0544668
trg	b1421
truB	b3166	0	-0.0806966	-0.109928	-0.0550751	-0.0370854	-0.0251676	-0.0238022	0.060822
trxA	b3781	0	-0.377541	-0.212736	-0.31144	-0.0618719	0.00944315	0.0976164	-0.0214245
tsx	b0411	0	0.946374	0.809627	0.794269	0.697567	0.627913	0.442978	0.211778
ubiG	b2232	0	-0.375001	-0.395987	-0.377612	-0.0799559	-0.0577641	-0.0878964	-0.0110975
udp	b3831	0	0.683619	0.527306	0.580182	0.0920986	0.298955	0.0804208	0.081488
ugpA	b3452	0	1.08036	1.01064	0.941994	-0.453035	-0.226659	-0.246301	-0.160581
ugpB	b3453
ugpC	b3450	0	0.964941	0.829769	0.957796	-0.408759	-0.230358	-0.215868	-0.0250342
ugpE	b3451	0	0.873678	0.890595	0.817439	-0.473825	-0.316576	-0.22632	-0.180908
ugpQ	b3449	0	0.301936	0.371841	0.25795	-0.373828	-0.334446	-0.207153	-0.136633
uhpT	b3666	0	2.49647	2.5385	2.59571	3.23363	3.29382	2.49327	0.834265
uidA	b1617	0	1.54748	1.52119	1.45969	0.284351	0.276513	0.219261	-0.0314441
uidB	b1616	0	1.08285	1.1656	1.1567	0.0156778	0.0887567	-0.0282083	-0.0282083
uidC	b1615	0	0.34294	0.598556	0.391403	-0.0192329	0.0313425	0.0638043	0.0732811
ulaA	b4193
ulaB	b4194	0	1.02106	0.991514	1.15743	0.417227	0.495905	0.253037	0.111639
ulaC	b4195	0	0.464468	0.48134	0.597899	0	0.00576363	0	0
ulaD	b4196	0	0.4799	0.472487	0.565757	0.123225	0.298845	0.159462	0.0499268
ulaE	b4197	0	0.0770058	0.0421496	0.166619	-0.00508625	0.00490471	-0.100966	0.0467342
ulaF	b4198	0	0.18723	0.10664	0.187345	0.00341867	0.0866296	-0.0422737	0.0467756
uxaA	b3091	0	1.4853	1.32666	1.37213	0.480625	0.448531	0.261844	0.0403935
uxaB	b1521	0	0.427644	0.570578	0.536254	-0.274132	-0.0255171	-0.0388615	-0.0560551
uxaC	b3092	0	1.90433	1.79997	1.88334	0.77771	0.703464	0.392428	0.0724285
uxuA	b4322	0	1.516	1.503	1.45392	0.279483	0.27312	0.171232	0.0547023
uxuB	b4323	0	1.64589	1.51093	1.5845	0.413287	0.468609	0.177751	0.119086
uxuR	b4324	0	0.341861	0.317788	0.324792	0.0487206	0.206373	0.0868672	-0.0276739
xseA	b2509	0	-0.610797	-0.607829	-0.550694	-0.146706	-0.0942023	-0.0394197	0.0328656
xylA	b3565	0	0.584118	0.565861	0.548762	-0.0776288	-0.077304	-0.174563	-0.0967641
xylB	b3564	0	0.326204	0.25367	0.333079	-0.11708	0.036156	-0.199505	-0.0913071
xylF	b3566	0	3.84216	3.84165	3.73113	0.415501	0.346585	0.219411	0.085896
xylG	b3567	0	2.15653	2.03874	2.11224	0.204701	0.263179	0.0126942	0.013019
xylH	b3568	0	1.71694	1.689	1.74075	0.152511	0.205369	0.0579513	-0.0214436
xylR	b3569	0	0.329816	0.359986	0.390864	0.0438259	0.177316	0.0474307	0.0346299
ychH	b1205	0	1.33897	1.27514	1.25761	0.145399	0.149221	-0.0739449	-0.0928254
yfiD	b2579	0	0.939054	1.02972	0.993261	0.746685	0.731115	0.441292	-0.0570308
yhcH	b3221	0	0.153536	0.197483	0.209901	-0.386481	-0.256846	-0.136854	-0.0796795
yhfA	b3356	0	0.253576	0.230556	0.149634	0.174349	0.202718	0.077264	0.00839731
yiaJ	b3574	0	-0.584467	-0.49058	-0.456818	0.00773296	0.0784899	-0.113782	0.0120543
yiaK	b3575	0	0.966581	1.05406	1.02238	0.167873	0.114862	0.0590562	0
yiaL	b3576	0	0	0	0	0	0	0	0
yiaM	b3577	0	0	0	0	0	0	0	0
yiaN	b3578	0	0	0	0.0435135	0.00355977	0	0	0
yiaO	b3579	0	0.0504541	0.127657	0.0624991	0	0	0	0
yjcH	b4068	0	5.56984	5.33208	5.14067	2.66913	2.35836	1.58615	0.374077
ykgR	b4671
ynfK	b1593	0	0.802833	0.782037	0.767741	-0.0066239	0.134775	0.0150427	0.0310443
zraR	b4004	0	0.151433	0.156833	0.248478	0.072916	0.13967	0.118239	0.122083
zraS	b4003	0	0.362145	0.364511	0.446063	0.0521797	0.18186	0.060885	0.145606

## Sheet: Stats
Type	Original						Filtered
	CRP-FFL#	# of TF	# of Gene	TU#	Single-TF	Multi-TFs	Filtered CRP-FFL#	Filtered TF#	Filtered Gene#	Filtered TU#	CRP-sFFLs	CRP-mFFLs	C#	!M#		Type	Number of CRP-FFLs	Number of TF	Number of Gene	Number of TU	CRP-sFFLs #	CRP-mFFLs #		Type	Group ID	Number of CRP-FFLs (Gene)	Coh1	Coh2	Coh3	Coh4	InCoh1	InCoh2	InCoh3	InCoh4	Number of Gene	Number of CRP-FFLs
Coh1	113	21	109	34	78	35	62	16	62	32	41	21	3			Coh1	62	16	62	32	41	21		CRP-sFFLs	A	11 (11)	V				V				11	11
Coh2	37	4	32	19	16	21	20	3	15	12	2	18	3	2		Coh2	20	3	15	12	2	18			B	88 (88)	V			V	V			V	88	88
Coh3	12	5	11	8	3	9	7	2	7	5	1	6	2			Coh3	7	2	7	5	1	6			C	18 (18)	V	V		V	V	V	V		18	18
Coh4	43	3	43	27	30	13	27	3	27	18	16	11	2			Coh4	27	3	27	18	16	11			D	2 (2)					V				2	2
InCoh1	139	33	119	73	67	72	99	22	83	55	48	51	3	1		InCoh1	99	22	83	55	48	51			E	3 (3)	V		V			V			3	3
InCoh2	13	3	13	10	9	4	9	3	9	8	5	4	2			InCoh2	9	3	9	8	5	4		CRP-mFFLs	1	6 (3)		V	V						3	6
InCoh3	3	2	3	2	1	2	1	1	1	1	1	0	1			InCoh3	1	1	1	1	1	0			2	21 (9)	V				V			V	9	21
InCoh4	33	5	33	19	11	22	20	4	20	11	8	12	3	1		InCoh4	20	4	20	11	8	12			3	4 (2)		V	V						2	4
	393	76	363	192	215	178	245	54	224	142	122	123													4	18 (8)		V	V			V			8	18
																									5	12 (4)					V			V	4	12
																									6	62 (28)	V			V	V			V	28	62
Method	Mangan et al. (2003)	EcoCyc and RegulonDB (2018)	Combining gene regulation information and microarray experiment (this study)
Coh1	11	113	62
Coh2	11	37	20
Coh3	1	12	7
Coh4	1	43	27
InCoh1	4	139	99
InCoh2	1	13	9
InCoh3	1	3	1
InCoh4	2	33	20

## Sheet: Legend
Idx	Description
1	C1
2	C2
4	C3
6	C2+C3
8	C4
9	C1+C4
16	IC1
17	C1+IC1
24	C4+IC1
32	IC2
34	C2+IC2
64	IC3
66	C2+IC3
128	IC4
129	C1+IC4
144	IC1+IC4
145	C1+IC1+IC4

## Sheet: TFs
C#	B#	Gene	TF	cAMP0	cAMP001	cAMP003	cAMP01	cAMP03	cAMP1	cAMP3	cAMP10	TFs	TU
0	b0432	cyoA	pdhR	0	0.08	0.19	0.3	0.29	0.03	0.01	0.02	IC1-pdhR;IC4-gadE	cyoABCDE
5	b0431	cyoB	pdhR	0	0.14	0.25	0.41	0.37	0.09	0.08	0.13	IC1-fur,pdhR;IC4-gadE	cyoABCDE
5	b0430	cyoC	pdhR	0	0.13	0.25	0.42	0.42	0.08	0.09	0.12	IC1-fur,pdhR;IC4-gadE	cyoABCDE
5	b0429	cyoD	pdhR	0	0.16	0.33	0.56	0.58	0.2	0.19	0.22	IC1-fur,pdhR;IC4-gadE	cyoABCDE
5	b0428	cyoE	pdhR	0	0.21	0.34	0.5	0.57	0.27	0.25	0.28	IC1-fur,pdhR;IC4-gadE	cyoABCDE;cyoE
3	b4382	deoA	fis	0	-0.09	-0.24	-0.37	-0.41	-0.07	-0.13	-0.05	C2-fis;C3-cytR	deoCABD;deoABD
3	b4383	deoB	fis	0	-0.11	-0.19	-0.36	-0.42	-0.09	-0.17	-0.17	C2-fis;C3-cytR	deoBD;deoCABD;deoABD
4	b4381	deoC	fis	0	-0.15	-0.25	-0.34	-0.45	-0.29	-0.29	-0.32	C2-fis;C3-cytR	deoCABD
0	b4384	deoD	fis	0	-0.08	-0.21	-0.23	-0.25	-0.06	-0.12	-0.06	C2-fis;C3-cytR	deoBD;deoCABD;deoABD
0	b0620	dpiA	dpiA	0	0.06	-0.05	-0.03	-0.18	-0.3	-0.3	-0.35	C2-dpiA;IC3-dcuR	dpiBA
0	b0619	dpiB	dpiA	0	0.02	-0.02	0.07	-0.09	0	-0.21	-0.21	C2-dpiA;IC3-dcuR	dpiBA
2	b4291	fecA	pdhR	0	-0.06	-0.16	-0.3	-0.39	-0.71	-0.73	-0.83	C1-pdhR;IC1-fur	fecABCDE
2	b4290	fecB	pdhR	0	0.04	-0.01	-0.16	-0.25	-0.61	-0.64	-0.77	C1-pdhR;IC1-fur	fecABCDE
2	b4289	fecC	pdhR	0	-0.02	-0.21	-0.37	-0.45	-0.86	-0.92	-0.86	C1-pdhR;IC1-fur	fecABCDE
2	b4288	fecD	pdhR	0	0	-0.1	-0.22	-0.34	-0.39	-0.47	-0.63	C1-pdhR;IC1-fur	fecABCDE
2	b4287	fecE	pdhR	0	0.01	-0.11	-0.2	-0.32	-0.79	-0.78	-0.9	C1-pdhR;IC1-fur	fecABCDE;fecE
6	b1891	flhC	ompR	0	0.22	0.66	1.02	1.08	1.73	1.69	1.72	C4-ompR;IC1-fur	flhDC;flhC
6	b1892	flhD	ompR	0	0.23	0.66	0.99	1.08	1.86	1.76	1.85	C4-ompR;IC1-fur	flhDC
0	b4122	fumB	dcuR	0	-0.03	0.1	0.15	-0.04	0.23	0.05	0.05	C1-dcuR;C4-fis	dcuB-fumB;fumB
6	b1611	fumC	marA	0	-0.01	-0.07	0.15	-0.01	0.5	0.46	0.58	C1-marA;IC1-fur	fumC;fumAC
0	b0683	fur	oxyR	0	-0.02	-0.07	-0.09	-0.07	-0.11	-0.11	-0.1	C1-oxyR;IC1-fur	uof-fur;fldA-uof-fur;fur
4	b3517	gadA	gadX	0	-0.52	-0.82	-1.31	-1.49	-1.44	-1.47	-1.43	C2-gadX;IC2-fis	gadAX
4	b1493	gadB	gadX	0	-0.45	-0.73	-1.22	-1.29	-1.29	-1.33	-1.29	C2-gadE,gadX;IC2-fis	gadBC
4	b1492	gadC	gadX	0	-0.55	-0.75	-1.28	-1.48	-1.44	-1.38	-1.37	C2-gadE,gadX;IC2-fis	gadBC;gadC
4	b3512	gadE	gadX	0	-0.51	-0.83	-1.32	-1.45	-1.43	-1.47	-1.47	C2-gadE,gadX	gadE;gadE-mdtEF
4	b3516	gadX	gadX	0	-0.24	-0.31	-0.52	-0.59	-0.32	-0.33	-0.38	C2-gadX;IC2-fis	gadX;gadAX;gadXW
0	b0759	galE	hupB	0	0.02	0	0.02	-0.02	0.14	0.08	0.07	IC1-hupA,hupB	galETKM
6	b0757	galK	hupB	0	0	0.03	0.1	0.12	0.57	0.47	0.5	IC1-hupA,hupB	galETKM
0	b0756	galM	hupB	0	-0.01	-0.03	-0.04	-0.07	0.03	-0.01	-0.03	C3-hupA,hupB	galETKM;galM
2	b2943	galP	galS	0	-0.16	-0.33	-0.36	-0.54	-2.07	-2.13	-2.23	IC1-hupA,hupB	galP
0	b0758	galT	hupB	0	0.05	0.07	0.09	0.04	0.3	0.21	0.22	IC1-hupA,hupB	galETKM
6	b2980	glcC	fis	0	0.12	0.19	0.35	0.3	1.52	1.52	1.58	C4-fis;IC1-glcC	glcC
0	b2241	glpA	flhD	0	-0.06	-0.06	-0.06	-0.04	0.2	0.04	0	C1-flhD;IC1-glpR; IC4-fis	glpABC
0	b2242	glpB	flhD	0	-0.03	-0.07	0.03	-0.18	0.1	0.03	-0.03	C1-flhD;IC1-glpR; IC4-fis	glpABC
0	b2243	glpC	flhD	0	0.07	0.21	0.11	-0.15	0.1	0.38	0.1	C1-flhD;IC1-glpR; IC4-fis	glpABC
0	b2239	glpQ	glpR	0	0	-0.08	-0.09	-0.11	0.22	0.09	0.15	IC1-glpR;IC4-fis	glpTQ
6	b2240	glpT	glpR	0	0.07	0.11	0.11	0.11	0.73	0.87	1	IC1-glpR;IC4-fis	glpTQ
1	b3212	gltB	gadE	0	0.16	0.21	0.39	0.33	-0.34	-0.48	-0.39	C2-gadE;C3-fur	gltBDF
1	b3213	gltD	gadE	0	0.19	0.17	0.45	0.42	-0.53	-0.59	-0.46	C2-gadE;C3-fur	gltBDF
1	b3214	gltF	gadE	0	0.37	0.58	0.83	0.84	-0.29	-0.49	-0.59	C2-gadE;C3-fur	gltBDF
6	b4321	gntP	uxuR	0	0.04	0.25	0.62	0.55	2.34	2.4	2.47	IC1-oxyR,uxuR	gntP
6	b2579	grcA	pdhR	0	-0.06	0.44	0.73	0.75	0.99	1.03	0.94	IC1-fur,pdhR;IC4-fis	grcA
0	b2706	gutM	gutM	0	-0.04	0.05	0.11	0.02	0.24	0.38	0.27	C1-gutM;IC1-srlR	srlAEBD-gutM-srlR-gutQ
0	b2708	gutQ	gutM	0	0	0.14	0.22	0.09	0.26	0.29	0.21	C1-gutM;IC1-srlR	srlAEBD-gutM-srlR-gutQ
0	b0116	lpd	pdhR	0	0	-0.01	0.09	0.01	0.04	-0.02	0.03	IC1-pdhR;IC4-fis,fur	pdhR-aceEF-lpd;lpd
6	b4034	malE	malT	0	0.15	1.24	1.89	2.61	6.13	6.14	6.21	C1-malT;IC4-fis	malEFG
6	b4033	malF	malT	0	-0.14	0.21	0.54	0.89	4.5	4.5	4.56	C1-malT;IC4-fis	malEFG
6	b4032	malG	malT	0	-0.04	0.12	0.17	0.36	3.72	3.68	3.76	C1-malT;IC4-fis	malEFG
2	b1531	marA	marA	0	0	-0.07	-0.08	-0.09	-0.31	-0.43	-0.45	C1-marA;IC1-marR;IC4-fis	marRAB
2	b1532	marB	marA	0	-0.08	-0.01	-0.18	-0.17	-0.52	-0.4	-0.57	C1-marA;IC1-marR;IC4-fis	marRAB
2	b1530	marR	marA	0	0.05	-0.02	-0.08	-0.09	-0.29	-0.4	-0.45	C1-marA;IC1-marR;IC4-fis	marRAB
0	b2783	mazE	mazE	0	-0.01	-0.09	0	0.01	0.08	-0.07	0	IC1-mazE;IC4-fis	relA-mazEF;mazEFG
0	b2782	mazF	mazE	0	-0.05	-0.04	0.04	0.01	-0.07	-0.14	0	IC1-mazE;IC4-fis	relA-mazEF;mazEFG
0	b3236	mdh	flhD	0	0.03	0.05	0.16	0.13	0.14	0.19	0.22	IC1-flhD;IC4-dpiA	mdh
4	b3513	mdtE	gadX	0	-0.54	-0.86	-1.27	-1.5	-1.72	-1.81	-1.87	C2-gadE,gadX	gadE-mdtEF;mdtEF
4	b3514	mdtF	gadX	0	-0.54	-0.77	-1.17	-1.37	-1.58	-1.61	-1.79	C2-gadE,gadX	gadE-mdtEF;mdtEF
6	b2149	mglA	flhD	0	0.47	2.12	3.03	3.2	4.56	4.58	4.6	C4-fis,IC1-flhC,flhD,galS	mglBAC;mglAC
6	b2150	mglB	flhD	0	0.39	1.77	2.53	2.77	4.28	4.2	4.26	IC1-flhC,flhD,galS	mglBAC
6	b2148	mglC	fis	0	0.32	1.85	2.58	2.8	3.88	3.93	3.95	C4-fis;IC1-flhC,flhD,galS	mglBAC;mglAC;mglC
6	b3599	mtlA	fis	0	0.21	0.65	1.11	1.09	1.97	1.96	1.98	C4-fis;IC1-mtlR	mtlADR
6	b3600	mtlD	fis	0	0.15	0.22	0.53	0.49	1.01	0.93	0.98	C4-fis;IC1-mtlR	mtlADR
6	b3601	mtlR	fis	0	0.18	0.34	0.49	0.59	1.13	1.09	1.09	C4-fis;IC1-mtlR	mtlADR
0	b2741	rpoS	fur	0	-0.02	0.07	0.06	0.03	0.02	0.11	0.06	IC1-fur;IC4-gadX	nlpD-rpoS;rpoS
0	b3908	sodA	marA	0	-0.02	-0.02	0.02	-0.02	-0.05	-0.06	-0.09	C1-marA;IC1-fur	sodA
6	b2702	srlA	gutM	0	0	0	0.52	0.47	2.62	2.72	2.68	C1-gutM;IC1-srlR	srlAEBD-gutM-srlR-gutQ
6	b2704	srlB	gutM	0	0	0.17	0.76	0.93	2.44	2.35	2.43	C1-gutM;IC1-srlR	srlAEBD-gutM-srlR-gutQ
6	b2705	srlD	gutM	0	0.13	0.63	0.99	1.03	2.24	2.03	2.07	C1-gutM;IC1-srlR	srlAEBD-gutM-srlR-gutQ
6	b2703	srlE	gutM	0	0	1.11	1.69	1.8	3.59	3.72	3.63	C1-gutM;IC1-srlR	srlAEBD-gutM-srlR-gutQ
6	b2707	srlR	gutM	0	-0.01	-0.05	0.02	0.09	0.21	0.31	0.41	C1-gutM;IC1-srlR	srlAEBD-gutM-srlR-gutQ;srlR
6	b4322	uxuA	uxuR	0	0.05	0.17	0.27	0.28	1.45	1.5	1.52	IC1-oxyR,uxuR	uxuAB
6	b4323	uxuB	uxuR	0	0.12	0.18	0.47	0.41	1.58	1.51	1.65	IC1-oxyR,uxuR	uxuAB
6	b3565	xylA	xylR	0	-0.1	-0.17	-0.08	-0.08	0.55	0.57	0.58	C1-xylR;IC1-araC	xylAB
0	b3564	xylB	xylR	0	-0.09	-0.2	0.04	-0.12	0.33	0.25	0.33	C1-xylR;IC1-araC	xylAB
6	b3566	xylF	xylR	0	0.09	0.22	0.35	0.42	3.73	3.84	3.84	C1-xylR;C4-fis	xylFGHR
6	b3567	xylG	xylR	0	0.01	0.01	0.26	0.2	2.11	2.04	2.16	C1-xylR;C4-fis	xylFGHR
6	b3568	xylH	xylR	0	-0.02	0.06	0.21	0.15	1.74	1.69	1.72	C1-xylR;C4-fis	xylFGHR
0	b3569	xylR	xylR	0	0.03	0.05	0.18	0.04	0.39	0.36	0.33	C1-xylR;C4-fis	xylFGHR;xylR

## Sheet: NoTFs
C#	B#	Type	Gene	TF	cAMP0	cAMP001	cAMP003	cAMP01	cAMP03	cAMP1	cAMP3	cAMP10	TFs	TU	Idx
0	b1276	C1	acnA	marA	0	-0.13	-0.23	-0.14	-0.19	0.24	0.14	0.19		acnA	1
0	b2841	C1	araE	araC	0	0.03	0.06	0.03	0.03	0.15	0.27	0.16		araE	1
2	b1901	C1	araF	araC	0	-0.09	-0.04	-0.07	-0.08	2.59	2.51	2.58		araFGH	1
2	b1900	C1	araG	araC	0	-0.03	0.02	-0.04	-0.08	0.99	0.92	0.89		araFGH	1
2	b4460	C1	araH	araC	0	-0.04	-0.16	-0.12	-0.22	0.48	0.48	0.49		araFGH;araH	1
0	b0039	C1	caiA	caiF	0	0	0.03	0.14	0.08	0.33	0.1	0.04		caiTABCDE	1
0	b0038	C1	caiB	caiF	0	0.1	0.1	0.16	0	0.17	0.1	-0.01		caiTABCDE	1
3	b0037	C1	caiC	caiF	0	0.05	0.04	0.09	-0.06	-0.21	-0.25	-0.41		caiCDE;caiTABCDE;	1
0	b0036	C1	caiD	caiF	0	0	-0.04	0.16	0.04	0.08	0.05	0.02		caiTABCDE;caiCDE	1
0	b0035	C1	caiE	caiF	0	0.1	0.12	0.09	-0.04	0.33	0.1	0.11		caiTABCDE;caiCDE;caiE	1
0	b0040	C1	caiT	caiF	0	-0.04	-0.04	-0.04	-0.04	-0.04	-0.04	-0.04		caiTABCDE	1
2	b3528	C1	dctA	dcuR	0	0.04	0.72	1.14	1.34	2.8	2.79	2.82		dctA	1
2	b4123	C1	dcuB	dcuR	0	0	-0.01	0.05	-0.01	0.37	0.44	0.33		dcuB-fumB	1
0	b0041	C1	fixA	caiF	0	0	0	0	0	0.16	0.02	0.01		fixABCX	1
0	b0042	C1	fixB	caiF	0	0	0	0.03	0	0.16	0.19	0.03		fixABCX	1
0	b0043	C1	fixC	caiF	0	0	0	0	0	0.02	0.05	0		fixABCX	1
0	b0044	C1	fixX	caiF	0	0	0	0	0	0	0	0		fixABCX	1
0	b2492	C1	focB	hyfR	0	0.06	0.05	0.11	-0.06	-0.12	-0.07	-0.22		hyfABCDEFGHIJR-focB	1
2	b2800	C1	fucA	fucR	0	-0.07	0.16	0.43	0.43	1.74	1.82	2.07		fucAO	1
2	b2802	C1	fucI	fucR	0	-0.01	0.07	0.09	0.09	1.02	1.08	0.95		fucPIKUR	1
2	b2803	C1	fucK	fucR	0	0.1	0	0.14	-0.03	0.72	0.74	0.69		fucPIKUR	1
2	b2799	C1	fucO	fucR	0	0.17	0.5	0.75	0.76	2.83	2.84	2.86		fucAO	1
2	b2801	C1	fucP	fucR	0	0	0	0	0	0.8	0.64	0.8		fucPIKUR	1
2	b2805	C1	fucR	fucR	0	0.02	0.26	0.48	0.46	1.34	1.37	1.37		fucPIKUR;fucR	1
0	b2804	C1	fucU	fucR	0	0	0.17	0.39	0.3	0.08	0	0.01		fucPIKUR	1
0	b2481	C1	hyfA	hyfR	0	0	0	0	0	0	0	0		hyfABCDEFGHIJR-focB	1
0	b2482	C1	hyfB	hyfR	0	0.07	-0.01	0.02	0.04	0.08	-0.05	-0.02		hyfABCDEFGHIJR-focB	1
0	b2483	C1	hyfC	hyfR	0	0	0	0	0	0	0	0		hyfABCDEFGHIJR-focB	1
0	b2484	C1	hyfD	hyfR	0	0	0	0	0	0	0	0		hyfABCDEFGHIJR-focB	1
0	b2485	C1	hyfE	hyfR	0	0.06	-0.03	0	0.05	-0.08	-0.16	-0.09		hyfABCDEFGHIJR-focB	1
0	b2486	C1	hyfF	hyfR	0	-0.07	-0.04	0.04	-0.03	-0.01	-0.14	-0.09		hyfABCDEFGHIJR-focB	1
0	b2487	C1	hyfG	hyfR	0	-0.02	-0.04	-0.13	-0.19	-0.23	-0.12	-0.22		hyfABCDEFGHIJR-focB	1
3	b2488	C1	hyfH	hyfR	0	0.04	-0.08	-0.12	-0.27	-0.38	-0.45	-0.65		hyfABCDEFGHIJR-focB	1
3	b2489	C1	hyfI	hyfR	0	0.03	-0.2	-0.24	-0.37	-0.3	-0.46	-0.47		hyfABCDEFGHIJR-focB	1
0	b2490	C1	hyfJ	hyfR	0	-0.02	-0.03	-0.16	-0.22	-0.3	-0.26	-0.39		hyfABCDEFGHIJR-focB	1
0	b2491	C1	hyfR	hyfR	0	-0.14	-0.17	-0.26	-0.34	-0.18	-0.23	-0.28		hyfABCDEFGHIJR-focB	1
2	b4267	C1	idnD	idnR	0	0	0.35	0.91	0.9	2.85	2.82	2.86		idnDOTR	1
2	b4268	C1	idnK	idnR	0	-0.05	0.13	0.32	0.25	1.3	1.32	1.31		idnK	1
2	b4266	C1	idnO	idnR	0	-0.07	0.41	0.84	0.74	2.26	2.23	2.03		idnDOTR	1
0	b4264	C1	idnR	idnR	0	-0.01	0.02	0.11	0.01	-0.13	-0.14	-0.13		idnDOTR;idnR	1
2	b4265	C1	idnT	idnR	0	-0.08	0.04	0.08	-0.05	0.36	0.35	0.41		idnDOTR	1
2	b4036	C1	lamB	malT	0	-0.14	0.43	0.99	1.58	5.4	5.31	5.46		malK-lamB-malM	1
2	b4035	C1	malK	malT	0	0	0.26	0.88	1.46	5.98	6.03	6.08		malK-lamB-malM	1
2	b4037	C1	malM	malT	0	-0.09	0.4	0.66	1	4.5	4.51	4.48		malK-lamB-malM	1
2	b3571	C1	malS	malT	0	0.1	0.11	0.14	0.13	0.53	0.73	0.67		malS	1
5	b0347	C1	mhpA	mhpR	0	0.01	-0.11	-0.34	-0.42	-0.1	-0.27	-0.3		mhpABCDFE	1
3	b0348	C1	mhpB	mhpR	0	0.05	-0.04	-0.2	-0.28	-0.22	-0.34	-0.44		mhpABCDFE	1
0	b0349	C1	mhpC	mhpR	0	-0.04	-0.05	-0.02	0	-0.1	-0.1	-0.06		mhpABCDFE	1
0	b0350	C1	mhpD	mhpR	0	0.1	0.06	0.34	0.32	0.38	0.28	0.3		mhpABCDFE	1
1	b0352	C1	mhpE	mhpR	0	0.13	0.16	0.37	0.32	0.43	0.29	0.33		mhpABCDFE	1
0	b0351	C1	mhpF	mhpR	0	0.08	0.12	0.31	0.27	0.28	0.22	0.21		mhpABCDFE	1
2	b0929	C1	ompF	fur	0	0.31	0.89	1.22	1.39	1.85	1.83	1.87		ompF	1
2	b0331	C1	prpB	prpR	0	-0.03	-0.15	-0.26	-0.19	0.78	0.74	1		prpBCDE	1
2	b0333	C1	prpC	prpR	0	0.09	-0.11	-0.1	-0.22	1.05	1.17	1.08		prpBCDE	1
2	b0334	C1	prpD	prpR	0	0	0	0	0	1.01	1.07	1.11		prpBCDE	1
2	b0335	C1	prpE	prpR	0	0.14	0.19	-0.03	-0.01	0.75	0.77	0.86		prpBCDE	1
0	b3903	C1	rhaA	rhaS	0	0	0	0	0	0	0	0		rhaBAD	1
0	b3904	C1	rhaB	rhaS	0	0	0	0	0	0	0	0		rhaBAD	1
0	b3902	C1	rhaD	rhaS	0	0	0	0	0	0	0	0		rhaBAD;rhaD	1
2	b3906	C1	rhaR	rhaR	0	-0.03	0.01	0.05	-0.09	0.88	0.85	0.78		rhaSR	1
0	b3905	C1	rhaS	rhaR	0	0	0	0	0	0	0	0		rhaSR	1
1	b0723	C1	sdhA	fur	0	0.66	1.32	1.64	1.74	1.84	1.82	1.85		sdhDAB;sdhCDAB-sucABCD	1
1	b0724	C1	sdhB	fur	0	0.68	1.24	1.55	1.72	1.69	1.7	1.71		sdhDAB;sdhCDAB-sucABCD	1
1	b0721	C1	sdhC	fur	0	0.7	1.33	1.64	1.74	1.87	1.87	1.89		sdhCDAB-sucABCD	1
1	b0722	C1	sdhD	fur	0	0.65	1.24	1.63	1.69	1.81	1.81	1.85		sdhDAB;sdhCDAB-sucABCD	1
1	b0726	C1	sucA	fur	0	0.43	0.82	1.15	1.13	0.93	0.88	0.94		sucABCD;sdhCDAB-sucABCD;sucAB	1
1	b0727	C1	sucB	fur	0	0.33	0.59	0.84	0.87	0.71	0.68	0.71		sucABCD;sdhCDAB-sucABCD;sucAB	1
1	b0728	C1	sucC	fur	0	0.39	0.79	1.14	1.15	1.03	0.97	1.02		sucABCD;sdhCDAB-sucABCD	1
1	b0729	C1	sucD	fur	0	0.37	0.82	1.13	1.15	1.09	1.07	1.07		sucABCD;sdhCDAB-sucABCD	1
0	b3118	C1	tdcA	tdcA	0	0	0	0	0	0.38	0.22	0.4		tdcABCDEFG	1
0	b3117	C1	tdcB	tdcA	0	0	0	0	0	0.28	0.39	0.25		tdcABCDEFG;tdcBCDEFG	1
0	b3116	C1	tdcC	tdcA	0	-0.05	0.06	0.13	0.07	0.26	0.27	0.17		tdcABCDEFG;tdcBCDEFG	1
2	b3115	C1	tdcD	tdcA	0	0.04	0.05	0.16	0.04	0.43	0.34	0.27		tdcABCDEFG;tdcBCDEFG	1
0	b3114	C1	tdcE	tdcA	0	-0.02	0.08	0.11	0.11	0.24	0.21	0.17		tdcABCDEFG;tdcBCDEFG	1
0	b3113	C1	tdcF	tdcA	0	0.07	-0.03	0.02	-0.04	0.11	-0.02	-0.07		tdcABCDEFG;tdcBCDEFG	1
0	b4471	C1	tdcG	tdcA	0	0.1	0.05	0.09	-0.02	0.12	0.09	0.01		tdcABCDEFG;tdcBCDEFG;tdcG	1
0	b4004	C1	zraR	zraR	0	0.12	0.12	0.14	0.07	0.25	0.16	0.15		zraSR	1
2	b4003	C1	zraS	zraR	0	0.15	0.06	0.18	0.05	0.45	0.36	0.36		zraSR	1
0	b0618	C2	citC	dpiA										citCDEFXG	2
0	b0617	C2	citD	dpiA	0	0	0	0	0	0	0	0		citCDEFXG	2
0	b0616	C2	citE	dpiA	0	0	0	0	0	0	0	0		citCDEFXG	2
0	b0615	C2	citF	dpiA	0	0	0	0	0	0	0	0		citCDEFXG	2
0	b0613	C2	citG	dpiA	0	0	0	0	0	0	0	0		citCDEFXG	2
0	b0614	C2	citX	dpiA	0	0	0	0	0	0	0	0		citCDEFXG	2
0	b3869	C2	glnL	fis	0	0.01	0.04	0.06	-0.03	-0.37	-0.3	-0.27		glnALG;glnLG	2
0	b3168	C2	infB	fis	0	0.01	-0.06	-0.11	-0.1	-0.13	-0.14	-0.16		metY-rimP-nusA-infB-rbfA-truB-rpsO-pnp;rimP-nusA-infB;metY-rimP-nusA-infB	2
0	b3171	C2	metY	fis										metY-rimP-nusA-infB-rbfA-truB-rpsO-pnp;metY-rimP-nusA-infB;metY	2
0	b3169	C2	nusA	fis	0	-0.01	-0.08	-0.16	-0.15	-0.22	-0.24	-0.27		metY-rimP-nusA-infB-rbfA-truB-rpsO-pnp;rimP-nusA-infB;metY-rimP-nusA-infB	2
0	b3164	C2	pnp	fis	0	0	-0.02	0	-0.03	0.17	0.13	0.16		metY-rimP-nusA-infB-rbfA-truB-rpsO-pnp;pnp;rpsO-pnp	2
3	b4111	C2	proP	fis	0	-0.14	-0.34	-0.54	-0.76	-1.46	-1.6	-1.55		proP	2
0	b3167	C2	rbfA	fis	0	0.08	0.05	0.03	-0.04	-0.03	-0.06	-0.06		metY-rimP-nusA-infB-rbfA-truB-rpsO-pnp	2
3	b3170	C2	rimP	fis	0	-0.06	-0.18	-0.21	-0.26	-0.38	-0.45	-0.47		metY-rimP-nusA-infB-rbfA-truB-rpsO-pnp;rimP-nusA-infB;metY-rimP-nusA-infB	2
0	b3165	C2	rpsO	fis	0	0.04	0.04	-0.03	-0.04	-0.23	-0.23	-0.28		metY-rimP-nusA-infB-rbfA-truB-rpsO-pnp;rpsO-pnp;rpsO	2
0	b3166	C2	truB	fis	0	0.06	-0.02	-0.03	-0.04	-0.06	-0.11	-0.08		metY-rimP-nusA-infB-rbfA-truB-rpsO-pnp	2
0	b0675	C3	nagD	nagC	0	0.01	0.06	0.12	0.1	-0.05	-0.1	-0.1		nagD;nagBACD	4
0	b3461	C3	rpoH	cytR	0	-0.1	0.01	-0.01	-0.05	-0.16	-0.13	-0.19		rpoH	4
5	b1036	C3	ycdZ	cytR	0	-0.04	-0.21	-0.36	-0.42	-0.16	-0.06	-0.07		ycdZ	4
0	b0118	C4	acnB	fis	0	-0.03	0.09	0.28	0.36	-0.01	-0.04	0.06		acnB	8
2	b4069	C4	acs	fis	0	0.29	1.33	2.01	2.25	3.87	3.99	4.03		acs-yjcH-actP	8
2	b4067	C4	actP	fis	0	0.28	1.33	2.17	2.42	5.03	5.19	5.31		acs-yjcH-actP;actP	8
2	b3588	C4	aldB	fis	0	-0.05	0.1	0.44	0.63	3.05	3.14	3.26		aldB	8
0	b2957	C4	ansB	fis	0	0.12	0.09	0.21	0.02	0.19	0.17	0.12		ansB	8
0	b3721	C4	bglB	fis	0	0	0	0	0	0	0	0		bglGFB	8
0	b3722	C4	bglF	fis	0	-0.04	-0.08	0.05	-0.06	-0.37	-0.3	-0.11		bglGFB	8
0	b3723	C4	bglG	fis	0	0	0	0	0	0	0	0		bglGFB;bglG	8
0	b3357	C4	crp	fis	0	0.04	0.12	0.17	0.16	0.14	0.09	0.12		crp	8
2	b2344	C4	fadL	ompR	0	-0.06	0.24	0.46	0.61	2.4	2.51	2.59		fadL	8
3	b2507	C4	guaA	fis	0	0.04	-0.22	-0.39	-0.42	-1.07	-1.18	-1.12		guaBA	8
3	b2508	C4	guaB	fis	0	0.06	-0.21	-0.49	-0.57	-1.21	-1.25	-1.3		guaBA	8
3	b2231	C4	gyrA	fis	0	0.05	-0.05	0.03	-0.08	-0.47	-0.48	-0.44		gyrA	8
2	b1182	C4	hlyE	fis	0	0.02	0.01	-0.06	-0.2	1.23	1.27	1.14		hlyE	8
2	b0440	C4	hupB	fis	0	0.03	-0.05	0.42	0.23	0.48	0.44	0.59		hupB	8
0	b3580	C4	lyxK	yiaJ	0	0	0	0	0	0.16	0.03	0		yiaKLMNO-lyxK-sgbHUE	8
2	b3225	C4	nanA	fis	0	0.12	0.5	0.8	0.92	2.69	2.69	2.75		nanATEK-yhcH	8
2	b3223	C4	nanE	fis	0	-0.04	0.1	0.13	0.09	0.9	0.95	0.93		nanATEK-yhcH	8
2	b3222	C4	nanK	fis	0	-0.03	0.05	0.1	0.1	0.81	0.78	0.77		nanATEK-yhcH	8
2	b3224	C4	nanT	fis	0	-0.01	0.11	0.23	0.16	1.53	1.57	1.64		nanATEK-yhcH	8
2	b0553	C4	nmpC	ompR	0	0.79	3.02	3.77	4.08	5.34	5.33	5.22		nmpC	8
0	b0903	C4	pflB	fis	0	-0.08	-0.11	-0.16	-0.19	-0.12	-0.16	-0.12		focA-pflB;pflB	8
0	b3583	C4	sgbE	yiaJ	0	0.08	0.03	0.05	-0.13	0.06	-0.04	-0.02		yiaKLMNO-lyxK-sgbHUE	8
0	b3581	C4	sgbH	yiaJ	0	0.02	0.01	0.18	0.09	0.13	0.04	0.14		yiaKLMNO-lyxK-sgbHUE	8
0	b3582	C4	sgbU	yiaJ	0	0.06	-0.02	0	0	0.22	0.01	-0.03		yiaKLMNO-lyxK-sgbHUE	8
0	b3221	C4	yhcH	fis	0	-0.08	-0.14	-0.26	-0.39	0.21	0.2	0.15		nanATEK-yhcH;yhcH	8
2	b3575	C4	yiaK	yiaJ	0	0	0.06	0.11	0.17	1.02	1.05	0.97		yiaKLMNO-lyxK-sgbHUE	8
0	b3578	C4	yiaN	yiaJ	0	0	0	0	0	0.04	0	0		yiaKLMNO-lyxK-sgbHUE	8
0	b3579	C4	yiaO	yiaJ	0	0	0	0	0	0.06	0.13	0.05		yiaKLMNO-lyxK-sgbHUE	8
2	b4068	C4	yjcH	fis	0	0.37	1.59	2.36	2.67	5.14	5.33	5.57		acs-yjcH-actP	8
0	b0114	IC1	aceE	pdhR	0	-0.01	0.04	0.2	0.16	0.29	0.23	0.3		aceEF;pdhR-aceEF-lpd	16
2	b0115	IC1	aceF	pdhR	0	-0.01	0.03	0.22	0.22	0.39	0.32	0.41		aceEF;pdhR-aceEF-lpd	16
2	b2143	IC1	cdd	cytR	0	0.13	0.29	0.15	0.1	1.59	1.61	1.68		cdd	16
0	b1736	IC1	chbA	nagC	0	0.02	0.07	-0.01	-0.04	0.17	0.15	0.11		chbBCARFG	16
2	b1738	IC1	chbB	nagC	0	-0.03	0.06	-0.01	0.01	0.67	0.71	0.65		chbBCARFG	16
0	b1737	IC1	chbC	nagC	0	0	0	0	0	0	0	0		chbBCARFG	16
0	b1734	IC1	chbF	nagC	0	-0.08	-0.22	-0.06	-0.24	-0.13	-0.21	-0.24		chbBCARFG	16
0	b1733	IC1	chbG	nagC	0	-0.01	0.09	-0.01	-0.05	-0.05	-0.05	-0.14		chbBCARFG;chbG	16
0	b1735	IC1	chbR	nagC	0	-0.09	-0.06	-0.14	-0.28	-0.16	-0.14	-0.21		chbBCARFG	16
1	b2155	IC1	cirA	fur	0	0.17	0.37	0.6	0.68	0.47	0.36	0.36		cirA	16
0	b2417	IC1	crr	nagC	0	-0.02	-0.03	-0.04	-0.06	0.06	0.04	0.02		crr;ptsHI-crr	16
2	b3934	IC1	cytR	cytR	0	0.02	0.07	0.22	0.22	0.59	0.54	0.54		cytR	16
3	b0596	IC1	entA	fur	0	0.16	0.18	0.3	0.34	-0.37	-0.41	-0.39		entCEBAH	16
3	b0595	IC1	entB	fur	0	0.12	0.17	0.33	0.3	-0.36	-0.45	-0.41		entCEBAH	16
0	b0593	IC1	entC	fur	0	0.06	0.06	0.04	0.12	-0.3	-0.33	-0.37		entCEBAH	16
3	b0583	IC1	entD	fur	0	0.16	0.13	0.36	0.39	-0.62	-0.28	-0.15		fepA-entD;entD	16
0	b0594	IC1	entE	fur	0	0.07	0.13	0.26	0.27	-0.39	-0.36	-0.33		entCEBAH	16
3	b0597	IC1	entH	fur	0	0.14	0.11	0.24	0.3	-0.4	-0.56	-0.48		entCEBAH;entH	16
4	b0584	IC1	fepA	fur	0	0.15	0.24	0.41	0.51	0.15	0.04	0.13		fepA-entD	16
4	b0805	IC1	fiu	fur	0	0.25	0.43	0.71	0.81	0.03	0.08	0.19		fiu	16
2	b2151	IC1	galS	galS	0	-0.01	-0.05	-0.25	-0.31	0.9	0.91	0.94		galS	16
2	b3426	IC1	glpD	glpR	0	0.01	0.06	0.09	0	0.46	0.51	0.43		glpD	16
2	b3927	IC1	glpF	glpR	0	0	0.01	0.17	0.11	1.55	1.56	1.58		glpFKX	16
2	b3926	IC1	glpK	glpR	0	-0.02	0.03	0.17	0.07	1.31	1.29	1.38		glpFKX	16
0	b3925	IC1	glpX	glpR	0	-0.01	-0.18	-0.12	-0.32	-0.22	-0.3	-0.23		glpFKX;glpX	16
2	b3437	IC1	gntK	idnR	0	-0.11	0.02	0.18	0.12	0.43	0.6	0.54		gntRKU;gntKU;gntK	16
2	b4476	IC1	gntU	idnR	0	0.02	0.19	0.29	0.12	0.57	0.72	0.64		gntRKU;gntKU;gntU	16
2	b1513	IC1	lsrA	lsrR	0	0.11	0.22	0.4	0.34	1.4	1.46	1.53		lsrACDBFG-tam	16
2	b1516	IC1	lsrB	lsrR	0	0.03	0.17	0.42	0.33	1.67	1.45	1.52		lsrACDBFG-tam	16
2	b1514	IC1	lsrC	lsrR	0	-0.02	0.06	0.25	0.18	1.16	1.06	1.04		lsrACDBFG-tam	16
2	b1515	IC1	lsrD	lsrR	0	0.08	0.17	0.28	0.1	1.09	1.18	1.03		lsrACDBFG-tam	16
2	b1517	IC1	lsrF	lsrR	0	0	0	0.12	0.08	1.25	1.25	1.22		lsrACDBFG-tam	16
2	b1518	IC1	lsrG	lsrR	0	0	-0.02	0.03	-0.04	1.03	1.11	1.02		lsrACDBFG-tam	16
2	b1511	IC1	lsrK	lsrR	0	0	0.17	0.34	0.34	1.57	1.6	1.6		lsrK;lsrRK	16
2	b1512	IC1	lsrR	lsrR	0	-0.06	-0.03	0.28	0.29	1.32	1.17	1.3		lsrRK	16
2	b1620	IC1	malI	malI	0	0.01	0.15	0.34	0.29	0.87	0.98	0.97		malI	16
2	b1621	IC1	malX	malI	0	0.01	0.2	0.35	0.36	1.19	1.19	1.34		malXY	16
0	b1622	IC1	malY	malI	0	0	0.16	0.22	0.15	0.29	0.33	0.2		malXY	16
2	b1817	IC1	manX	nagC	0	-0.05	0.7	1.27	1.3	2.46	2.46	2.48		manXYZ	16
2	b1818	IC1	manY	nagC	0	0.02	0.61	1.09	1.18	2.28	2.3	2.4		manXYZ	16
2	b1819	IC1	manZ	nagC	0	0	0.54	1.09	1.22	2.41	2.4	2.51		manXYZ	16
2	b0677	IC1	nagA	nagC	0	-0.06	-0.03	0.1	0.08	0.41	0.18	0.33		nagBACD;nagA	16
2	b0678	IC1	nagB	nagC	0	-0.1	-0.1	-0.06	-0.07	0.53	0.49	0.53		nagBACD	16
0	b0676	IC1	nagC	nagC	0	-0.01	0.07	0.01	0.05	-0.01	0.02	-0.03		nagBACD;nagC	16
2	b0679	IC1	nagE	nagC	0	0.29	0.5	0.97	1.03	2.25	2.13	2.27		nagE	16
0	b4311	IC1	nanC	nagC	0	0	0	0	0	0	0	0		nanCM;nanC	16
0	b4310	IC1	nanM	nagC	0	-0.09	-0.07	-0.16	-0.23	0.22	0.22	0.15		nanCM	16
1	b2393	IC1	nupC	cytR	0	0.15	0.33	0.74	0.74	0.46	0.39	0.56		nupC	16
2	b2964	IC1	nupG	cytR	0	0.01	0.15	0.11	0.1	1.45	1.65	1.7		mutY-yggX-mltC-nupG;yggX-mltC-nupG;nupG	16
0	b3961	IC1	oxyR	oxyR	0	0	0.09	0.28	0.12	0.06	0.06	0.04		oxyR	16
2	b0113	IC1	pdhR	pdhR	0	0	0.23	0.34	0.31	0.47	0.47	0.42		pdhR-aceEF-lpd	16
0	b3363	IC1	ppiA	cytR	0	0.17	0.2	0.15	0.2	0.14	0.07	0.04		ppiA	16
2	b0330	IC1	prpR	prpR	0	0.03	-0.23	-0.32	-0.36	1.12	0.96	1.17		prpR	16
0	b2415	IC1	ptsH	nagC	0	0.04	0.05	0.17	0.14	0.22	0.18	0.27		ptsHI-crr	16
2	b3749	IC1	rbsA	rbsR	0	0.86	1.67	2.11	2.25	3.43	3.47	3.43		rbsDACBKR	16
2	b3751	IC1	rbsB	rbsR	0	0.33	0.86	1.3	1.45	2.28	2.27	2.29		rbsDACBKR	16
2	b3750	IC1	rbsC	rbsR	0	0.88	1.78	2.15	2.23	3.25	3.18	3.19		rbsDACBKR	16
2	b3748	IC1	rbsD	rbsR	0	1.09	2.15	2.7	2.92	4.01	4.11	4.06		rbsDACBKR	16
2	b3752	IC1	rbsK	rbsR	0	0.22	0.5	0.82	0.83	1.57	1.51	1.6		rbsDACBKR	16
2	b3753	IC1	rbsR	rbsR	0	0.16	0.38	0.64	0.58	1.35	1.22	1.26		rbsDACBKR	16
0	b1519	IC1	tam	lsrR	0	-0.11	-0.25	-0.34	-0.4	0.09	0.09	0.15		lsrACDBFG-tam;tam	16
2	b0411	IC1	tsx	cytR	0	0.21	0.44	0.63	0.7	0.79	0.81	0.95		tsx	16
2	b3831	IC1	udp	cytR	0	0.08	0.08	0.3	0.09	0.58	0.53	0.68		udp	16
2	b1617	IC1	uidA	uxuR	0	-0.03	0.22	0.28	0.28	1.46	1.52	1.55		uidABC	16
2	b1616	IC1	uidB	uxuR	0	-0.03	-0.03	0.09	0.02	1.16	1.17	1.08		uidABC	16
2	b1615	IC1	uidC	uxuR	0	0.07	0.06	0.03	-0.02	0.39	0.6	0.34		uidABC;uidC	16
0	b4324	IC1	uxuR	uxuR	0	-0.03	0.09	0.21	0.05	0.32	0.32	0.34		uxuR	16
3	b1112	IC2	bhsA	comR	0	-0.24	-0.42	-0.96	-1.09	-1.66	-1.74	-1.94		bhsA	32
0	b3368	IC2	cysG	fis	0	0.05	0.05	0.16	0.13	0.09	-0.02	0.03		nirBDC-cysG;cysG	32
0	b3260	IC2	dusB	fis	0	0.02	0.01	-0.2	-0.08	-0.03	-0.05	-0.08		dusB-fis	32
0	b3261	IC2	fis	fis	0	0.1	0.02	-0.2	-0.11	-0.11	-0.13	-0.2		dusB-fis	32
5	b3365	IC2	nirB	fis	0	-0.14	-0.2	-0.47	-0.72	-0.46	-0.45	-0.52		nirBDC-cysG	32
0	b3367	IC2	nirC	fis	0	0.02	-0.06	0.16	0.08	0.33	0.21	0.2		nirBDC-cysG	32
3	b3366	IC2	nirD	fis	0	-0.07	-0.06	-0.19	-0.31	-0.42	-0.33	-0.42		nirBDC-cysG	32
3	b4376	IC2	osmY	fis	0	-0.09	-0.16	-0.22	-0.27	-0.48	-0.55	-0.56		osmY	32
3	b3574	IC2	yiaJ	yiaJ	0	0.01	-0.11	0.08	0.01	-0.46	-0.49	-0.58		yiaJ	32
3	b0396	IC3	araJ	araC	0	-0.12	-0.21	-0.3	-0.44	-0.91	-0.87	-0.92		araJ	64
2	b1040	IC4	csgD	ompR	0	0	0.13	0.28	0.28	0.9	0.91	0.91		csgDEFG	128
2	b1039	IC4	csgE	ompR	0	0.09	0.15	0.39	0.37	1.24	1.13	1.13		csgDEFG	128
2	b1038	IC4	csgF	ompR	0	0.15	0.28	0.46	0.47	1.24	1.16	1.12		csgDEFG	128
2	b1037	IC4	csgG	ompR	0	0.13	0.21	0.5	0.42	0.89	0.86	0.84		csgDEFG;csgG	128
2	b3093	IC4	exuT	dpiA	0	-0.05	-0.19	-0.14	-0.25	0.87	0.73	0.8		exuT	128
0	b3868	IC4	glnG	fis	0	0.07	0.17	0.2	0.15	-0.01	0.02	-0.04		glnALG;glnLG	128
0	b4000	IC4	hupA	fis	0	0.06	0.08	0.17	0.1	0.04	-0.02	0		hupA	128
2	b2234	IC4	nrdA	fis	0	0.03	0.13	0.29	0.26	0.49	0.46	0.5		nrdAB-yfaE	128
2	b2235	IC4	nrdB	fis	0	0	0.18	0.41	0.32	0.37	0.45	0.51		nrdAB-yfaE	128
0	b1421	IC4	trg	fis										trg	128
2	b2236	IC4	yfaE	fis	0	0.03	0.16	0.26	0.24	0.33	0.43	0.38		nrdAB-yfaE;yfaE	128

## Sheet: C1
Gene	C#	B#	Re-B#	TF	0	0.01	0.03	0.1	0.3	1	3	10	TF+	TU
acnA	0	b1276		marA	0	-0.13011	-0.230203	-0.138429	-0.187033	0.2439	0.139177	0.188396		acnA
araE	0	b2841		araC	0	0.027438	0.0634437	0.0250967	0.027269	0.146837	0.270151	0.159221		araE
araF	1	b1901		araC	0	-0.0892126	-0.0354366	-0.0653804	-0.0837372	2.58772	2.50646	2.57884		araFGH
araG	1	b1900		araC	0	-0.0291045	0.0168351	-0.0356604	-0.0830465	0.988947	0.916368	0.887441		araFGH
araH	1	b4460	b1898	araC	0	-0.0369398	-0.163905	-0.121466	-0.220186	0.484981	0.476432	0.492229		araFGH;araH
caiA	0	b0039		caiF	0	0.00139932	0.0273315	0.138173	0.0766408	0.33086	0.10416	0.0388934		caiTABCDE
caiB	0	b0038		caiF	0	0.103659	0.104727	0.158366	-0.00210748	0.170889	0.103385	-0.0102681		caiTABCDE
caiC	3	b0037		caiF	0	0.0477933	0.0352513	0.0949612	-0.0642013	-0.206453	-0.253394	-0.410518		caiTABCDE;caiCDE
caiD	0	b0036		caiF	0	0.00259764	-0.0377495	0.160566	0.0449534	0.078452	0.0476738	0.0238878		caiTABCDE;caiCDE
caiE	0	b0035		caiF	0	0.0983872	0.117088	0.0891259	-0.0394014	0.327461	0.0965685	0.107987		caiTABCDE;caiCDE;caiE
caiT	0	b0040		caiF	0	-0.0417511	-0.0417511	-0.0417511	-0.0417511	-0.0417511	-0.0417511	-0.0417511		caiTABCDE
dctA	1	b3528		dcuR	0	0.0351628	0.720317	1.13964	1.33532	2.798	2.78949	2.81554		dctA
dcuB	1	b4123		dcuR	0	0.00318543	-0.00620128	0.0450852	-0.00750847	0.369866	0.44493	0.333525		dcuB-fumB
fecA	3	b4291		pdhR	0	-0.0604734	-0.161556	-0.304967	-0.390078	-0.713925	-0.730504	-0.825314	fur(IC1)	fecABCDE
fecB	3	b4290		pdhR	0	0.0390814	-0.00688291	-0.161435	-0.250928	-0.608372	-0.643872	-0.77214	fur(IC1)	fecABCDE
fecC	3	b4289		pdhR	0	-0.021585	-0.210504	-0.370214	-0.45117	-0.863815	-0.918103	-0.864857	fur(IC1)	fecABCDE
fecD	3	b4288		pdhR	0	-0.0043008	-0.104463	-0.224396	-0.336298	-0.391852	-0.469091	-0.629305	fur(IC1)	fecABCDE
fecE	3	b4287		pdhR	0	0.0126254	-0.112299	-0.202055	-0.324381	-0.787284	-0.780706	-0.904766		fecABCDE;fecE
fixA	0	b0041		caiF	0	0	0	0	0	0.156685	0.0199325	0.00923995		fixABCX
fixB	0	b0042		caiF	0	0	0	0.0294249	0	0.157516	0.187765	0.0322046		fixABCX
fixC	0	b0043		caiF	0	0	0	0	0	0.0220021	0.0469198	0		fixABCX
fixX	0	b0044		caiF	0	0	0	0	0	0	0	0		fixABCX
focB	0	b2492		hyfR	0	0.0564176	0.0456389	0.108687	-0.0570206	-0.117789	-0.0659933	-0.220844		hyfABCDEFGHIJR-focB
fucA	1	b2800		fucR	0	-0.0733893	0.156023	0.432207	0.427049	1.7434	1.82132	2.06745		fucAO
fucI	1	b2802		fucR	0	-0.011937	0.0668938	0.0922656	0.0897081	1.01766	1.07532	0.949055		fucPIKUR
fucK	1	b2803		fucR	0	0.0990423	0.000891403	0.139775	-0.0345793	0.724348	0.744168	0.694842		fucPIKUR
fucO	1	b2799		fucR	0	0.167431	0.503059	0.75064	0.755779	2.83254	2.83502	2.86484		fucAO
fucP	1	b2801		fucR	0	0	0	0	0	0.800645	0.641643	0.804346		fucPIKUR
fucR	1	b2805		fucR	0	0.0180974	0.263035	0.480958	0.459057	1.33564	1.36962	1.37018		fucPIKUR;fucR
fucU	0	b2804		fucR	0	-0.0015542	0.174664	0.388521	0.301117	0.0790393	0.00342917	0.0125183		fucPIKUR
fumB	0	b4122		dcuR	0	-0.0305988	0.0995365	0.147871	-0.0431608	0.230122	0.0491693	0.0458455	fis(C4)	dcuB-fumB;fumB
fumB	0	b4122		fur	0	-0.0305988	0.0995365	0.147871	-0.0431608	0.230122	0.0491693	0.0458455	fis(C4)	dcuB-fumB;fumB
fumC	1	b1611		marA	0	-0.00697669	-0.0659472	0.151802	-0.012367	0.498025	0.461989	0.578933	fur(IC1)	fumC;fumAC
fur	0	b0683		oxyR	0	-0.0230411	-0.0712505	-0.0906373	-0.0743666	-0.114819	-0.109564	-0.101282	fur(IC1)	uof-fur;fldA-uof-fur;fur
glpA	0	b2241		flhD	0	-0.0626238	-0.0626238	-0.0626238	-0.0415089	0.200701	0.0412801	0.00338441	glpR(IC1), fis(IC4)	glpABC
glpA	0	b2241		flhC	0	-0.0626238	-0.0626238	-0.0626238	-0.0415089	0.200701	0.0412801	0.00338441	glpR(IC1), fis(IC4)	glpABC
glpB	0	b2242		flhD	0	-0.0349472	-0.0722488	0.0331224	-0.17649	0.103633	0.0286261	-0.0283981	glpR(IC1), fis(IC4)	glpABC
glpB	0	b2242		flhC	0	-0.0349472	-0.0722488	0.0331224	-0.17649	0.103633	0.0286261	-0.0283981	glpR(IC1), fis(IC4)	glpABC
glpC	0	b2243		flhD	0	0.0653573	0.211508	0.114424	-0.151495	0.101195	0.381387	0.0978235	glpR(IC1), fis(IC4)	glpABC
glpC	0	b2243		flhC	0	0.0653573	0.211508	0.114424	-0.151495	0.101195	0.381387	0.0978235	glpR(IC1), fis(IC4)	glpABC
gutM	0	b2706		gutM	0	-0.0382281	0.0495753	0.107651	0.0150983	0.242314	0.375063	0.274875	srlR(IC1)	srlAEBD-gutM-srlR-gutQ
gutQ	0	b2708		gutM	0	0.00446967	0.139822	0.220328	0.0936142	0.261343	0.288648	0.207504	srlR(IC1)	srlAEBD-gutM-srlR-gutQ
hyfA	0	b2481		hyfR	0	0	0	0	0	0	0	0		hyfABCDEFGHIJR-focB
hyfB	0	b2482		hyfR	0	0.0746289	-0.0108535	0.0159454	0.035391	0.0759359	-0.0520153	-0.0234413		hyfABCDEFGHIJR-focB
hyfC	0	b2483		hyfR	0	0	0	0	0	0	0	0		hyfABCDEFGHIJR-focB
hyfD	0	b2484		hyfR	0	0	0	0	0	0	0	0		hyfABCDEFGHIJR-focB
hyfE	0	b2485		hyfR	0	0.0574347	-0.0321551	-0.0030281	0.054071	-0.0773424	-0.158636	-0.0892922		hyfABCDEFGHIJR-focB
hyfF	0	b2486		hyfR	0	-0.0749019	-0.0360852	0.035593	-0.0330432	-0.0130548	-0.139572	-0.0903083		hyfABCDEFGHIJR-focB
hyfG	0	b2487		hyfR	0	-0.0177721	-0.0417437	-0.129304	-0.194149	-0.226034	-0.118477	-0.22151		hyfABCDEFGHIJR-focB
hyfH	3	b2488		hyfR	0	0.0433484	-0.0755268	-0.12173	-0.267392	-0.379292	-0.452895	-0.647767		hyfABCDEFGHIJR-focB
hyfI	3	b2489		hyfR	0	0.0291385	-0.199158	-0.237244	-0.365658	-0.300367	-0.45763	-0.46586		hyfABCDEFGHIJR-focB
hyfJ	0	b2490		hyfR	0	-0.0228019	-0.0253349	-0.157401	-0.220077	-0.302014	-0.262272	-0.392401		hyfABCDEFGHIJR-focB
hyfR	0	b2491		hyfR	0	-0.142666	-0.169977	-0.261196	-0.338449	-0.180046	-0.228157	-0.283397		hyfABCDEFGHIJR-focB
idnD	1	b4267		idnR	0	0	0.352079	0.912181	0.895427	2.85361	2.81569	2.85955		idnDOTR
idnK	1	b4268		idnR	0	-0.0516323	0.134704	0.315822	0.2464	1.29831	1.31608	1.31118		idnK
idnO	1	b4266		idnR	0	-0.0669203	0.4115	0.839802	0.742572	2.25654	2.23001	2.03429		idnDOTR
idnR	0	b4264		idnR	0	-0.00891672	0.0191025	0.11088	0.013804	-0.12647	-0.144849	-0.131208		idnDOTR;idnR
idnT	1	b4265		idnR	0	-0.0848162	0.0372231	0.075047	-0.0480451	0.357907	0.3536	0.410584		idnDOTR
lamB	1	b4036		malT	0	-0.137344	0.434265	0.991264	1.57595	5.39897	5.31401	5.46193		malK-lamB-malM
malE	1	b4034		malT	0	0.151891	1.24475	1.89099	2.60914	6.12939	6.13736	6.20888	fis(IC4)	malEFG
malF	1	b4033		malT	0	-0.141283	0.21418	0.542157	0.894955	4.49895	4.50091	4.55996	fis(IC4)	malEFG
malG	1	b4032		malT	0	-0.0432112	0.119361	0.174973	0.35548	3.71969	3.67581	3.75698	fis(IC4)	malEFG
malK	1	b4035		malT	0	0	0.264783	0.881986	1.464	5.97527	6.03023	6.08143		malK-lamB-malM
malM	1	b4037		malT	0	-0.0898048	0.396376	0.658931	0.996889	4.50436	4.51441	4.47946		malK-lamB-malM
malS	1	b3571		malT	0	0.103445	0.107164	0.136671	0.134412	0.533891	0.730865	0.673741		malS
marA	3	b1531		marA	0	0.000269245	-0.0687603	-0.0808392	-0.0863422	-0.310561	-0.433222	-0.446601	marR(IC1),fis(IC4)	marRAB
marB	3	b1532		marA	0	-0.0799731	-0.0087647	-0.183811	-0.172391	-0.520694	-0.401575	-0.570211	marR(IC1),fis(IC4)	marRAB
marR	3	b1530		marA	0	0.050121	-0.0220543	-0.0753314	-0.0941748	-0.28777	-0.397224	-0.453246	marR(IC1),fis(IC4)	marRAB
mhpA	3	b0347		mhpR	0	0.00550742	-0.113331	-0.340293	-0.422302	-0.09914	-0.268575	-0.301485		mhpABCDFE
mhpB	3	b0348		mhpR	0	0.052068	-0.03853	-0.204392	-0.28107	-0.215904	-0.33834	-0.436216		mhpABCDFE
mhpC	0	b0349		mhpR	0	-0.03814	-0.0511952	-0.0177956	0.00421787	-0.103863	-0.095799	-0.0629355		mhpABCDFE
mhpD	0	b0350		mhpR	0	0.0968761	0.0571128	0.341498	0.317908	0.378815	0.28076	0.304387		mhpABCDFE
mhpE	2	b0352		mhpR	0	0.13	0.164248	0.365016	0.322356	0.431224	0.288408	0.327502		mhpABCDFE
mhpF	0	b0351		mhpR	0	0.0773001	0.120135	0.308028	0.274435	0.280008	0.217377	0.213904		mhpABCDFE
ompF	2	b0929		fur	0	0.312851	0.885495	1.21598	1.3946	1.85164	1.82502	1.8676	ompR	ompF
prpB	1	b0331		prpR	0	-0.031182	-0.152306	-0.262913	-0.192284	0.779073	0.738259	0.997208		prpBCDE
prpC	1	b0333		prpR	0	0.0918002	-0.109084	-0.0976492	-0.217529	1.05026	1.17062	1.0818		prpBCDE
prpD	1	b0334		prpR	0	0	0	0	0	1.01116	1.07125	1.10832		prpBCDE
prpE	1	b0335		prpR	0	0.143616	0.194106	-0.0344146	-0.0070531	0.749962	0.772688	0.861607		prpBCDE
rhaA	0	b3903		rhaS	0	0	0	0	0	0	0	0		rhaBAD
rhaB	0	b3904		rhaS	0	0	0	0	0	0	0	0		rhaBAD
rhaD	0	b3902		rhaS	0	0	0	0	0	0	0	0		rhaBAD;rhaD
rhaR	1	b3906		rhaR	0	-0.0314846	0.0139965	0.0498436	-0.0878107	0.877305	0.849301	0.781159		rhaSR
rhaS	0	b3905		rhaR	0	0	0	0	0	0	0	0		rhaSR
sdhA	2	b0723		fur	0	0.661381	1.31578	1.63629	1.73623	1.84431	1.81906	1.84591		sdhDAB;sdhCDAB-sucABCD
sdhB	2	b0724		fur	0	0.67827	1.24164	1.55126	1.72492	1.69084	1.69902	1.71392		sdhDAB;sdhCDAB-sucABCD
sdhC	2	b0721		fur	0	0.697669	1.33095	1.64337	1.74441	1.87142	1.86848	1.88659		sdhCDAB-sucABCD
sdhD	2	b0722		fur	0	0.647055	1.2354	1.626	1.68579	1.80916	1.8121	1.84968		sdhDAB;sdhCDAB-sucABCD
sodA	0	b3908		marA	0	-0.023611	-0.0158988	0.0171582	-0.0216892	-0.0467634	-0.0582624	-0.0865569	fur(IC1)	sodA
srlA	1	b2702		gutM	0	0	0	0.522896	0.47471	2.61916	2.72444	2.67516	srlR(IC1)	srlAEBD-gutM-srlR-gutQ
srlB	1	b2704		gutM	0	0	0.16978	0.760308	0.928537	2.44232	2.35364	2.42897	srlR(IC1)	srlAEBD-gutM-srlR-gutQ
srlD	1	b2705		gutM	0	0.128713	0.625803	0.986112	1.02564	2.23717	2.034	2.07343	srlR(IC1)	srlAEBD-gutM-srlR-gutQ
srlE	1	b2703	z4009	gutM	0	0	1.10639	1.68782	1.80394	3.58864	3.72207	3.62941	srlR(IC1)	srlAEBD-gutM-srlR-gutQ
srlR	1	b2707		gutM	0	-0.00920732	-0.0457755	0.0238381	0.0927988	0.211746	0.306432	0.40768	srlR(IC1)	srlAEBD-gutM-srlR-gutQ;srlR
sucA	2	b0726		fur	0	0.432134	0.82405	1.15166	1.12681	0.928998	0.880054	0.937934		sucABCD;sdhCDAB-sucABCD;sucAB
sucB	2	b0727		fur	0	0.331922	0.586141	0.844737	0.87469	0.708898	0.679035	0.710186		sucABCD;sdhCDAB-sucABCD;sucAB
sucC	2	b0728		fur	0	0.394855	0.793121	1.13782	1.1455	1.03304	0.967254	1.017		sucABCD;sdhCDAB-sucABCD
sucD	2	b0729		fur	0	0.372592	0.82397	1.12677	1.14839	1.09164	1.06568	1.068		sucABCD;sdhCDAB-sucABCD
tdcA	0	b3118		tdcA	0	0	0	0	0	0.379139	0.224134	0.397147		tdcABCDEFG
tdcB	0	b3117		tdcA	0	0	0	0	0	0.283696	0.391369	0.248551		tdcABCDEFG;tdcBCDEFG
tdcC	0	b3116		tdcA	0	-0.045088	0.056209	0.132307	0.0749746	0.256783	0.268545	0.171386		tdcABCDEFG;tdcBCDEFG
tdcD	1	b3115		tdcA	0	0.043441	0.0533661	0.161925	0.0446961	0.427936	0.343178	0.271999		tdcABCDEFG;tdcBCDEFG
tdcE	0	b3114		tdcA	0	-0.0220733	0.0751576	0.107441	0.105287	0.242547	0.214784	0.174899		tdcABCDEFG;tdcBCDEFG
tdcF	0	b3113		tdcA	0	0.0650003	-0.0281005	0.0157905	-0.044422	0.112346	-0.0196676	-0.0655698		tdcABCDEFG;tdcBCDEFG
tdcG	0	b4471	b3111	tdcA	0	0.0966936	0.0498304	0.086811	-0.0151143	0.122131	0.085138	0.0104643		tdcABCDEFG;tdcBCDEFG;tdcG
xylA	1	b3565		xylR	0	-0.0967641	-0.174563	-0.077304	-0.0776288	0.548762	0.565861	0.584118	araC(IC1)	xylAB
xylB	0	b3564		xylR	0	-0.0913071	-0.199505	0.036156	-0.11708	0.333079	0.25367	0.326204	araC(IC1)	xylAB
xylF	1	b3566		xylR	0	0.085896	0.219411	0.346585	0.415501	3.73113	3.84165	3.84216	fis(C4)	xylFGHR
xylG	1	b3567		xylR	0	0.013019	0.0126942	0.263179	0.204701	2.11224	2.03874	2.15653	fis(C4)	xylFGHR
xylH	1	b3568		xylR	0	-0.0214436	0.0579513	0.205369	0.152511	1.74075	1.689	1.71694	fis(C4)	xylFGHR
xylR	0	b3569		xylR	0	0.0346299	0.0474307	0.177316	0.0438259	0.390864	0.359986	0.329816	fis(C4)	xylFGHR;xylR
zraR	0	b4004		zraR	0	0.122083	0.118239	0.13967	0.072916	0.248478	0.156833	0.151433		zraSR
zraS	1	b4003		zraR	0	0.145606	0.060885	0.18186	0.0521797	0.446063	0.364511	0.362145		zraSR
												104

## Sheet: C2
Gene	C#	B#	Re-B#	TF	0	0.01	0.03	0.1	0.3	1	3	10	TF+	TU
citC	0	b0618		dpiA										citCDEFXG
citD	0	b0617		dpiA	0	0	0	0	0	0	0	0		citCDEFXG
citE	0	b0616		dpiA	0	0	0	0	0	0	0	0		citCDEFXG
citF	0	b0615		dpiA	0	0	0	0	0	0	0	0		citCDEFXG
citG	0	b0613		dpiA	0	0	0	0	0	0	0	0		citCDEFXG
citX	0	b0614		dpiA	0	0	0	0	0	0	0	0		citCDEFXG
deoA	2	b4382		fis	0	-0.0872332	-0.238471	-0.369312	-0.405479	-0.0651439	-0.128886	-0.0540504	cytR(C3)	deoCABD;deoABD
deoB	2	b4383		fis	0	-0.107385	-0.192699	-0.359669	-0.420842	-0.0891351	-0.174797	-0.170485	cytR(C3)	deoBD;deoCABD;deoABD
deoC	2	b4381		fis	0	-0.149989	-0.245225	-0.336009	-0.453006	-0.290026	-0.286707	-0.320784	cytR(C3)	deoCABD
deoD	0	b4384		fis	0	-0.0821991	-0.212184	-0.228821	-0.250483	-0.0611252	-0.118498	-0.0607169	cytR(C3)	deoBD;deoCABD;deoABD
dpiA	0	b0620		dpiA	0	0.0566244	-0.0510236	-0.0275697	-0.177436	-0.296932	-0.299471	-0.348719	dcuR(IC3)	dpiBA
dpiB	0	b0619		dpiA	0	0.021726	-0.0220306	0.0708021	-0.0893916	0.00294518	-0.209573	-0.211693	dcuR(IC3)	dpiBA
gadA	1	b3517		gadX	0	-0.523569	-0.822801	-1.31399	-1.49224	-1.43529	-1.46916	-1.42953	fis(IC2),gadE	gadAX
gadB	1	b1493		gadX	0	-0.450145	-0.731753	-1.21584	-1.29377	-1.29216	-1.32793	-1.28511	fis(IC2),gadE	gadBC
gadB	1	b1493		gadE	0	-0.450145	-0.731753	-1.21584	-1.29377	-1.29216	-1.32793	-1.28511	fis(IC2),gadE	gadBC
gadC	1	b1492		gadX	0	-0.545045	-0.751987	-1.28157	-1.47639	-1.43871	-1.38335	-1.37435	fis(IC2),gadE	gadBC;gadC
gadC	1	b1492		gadE	0	-0.545045	-0.751987	-1.28157	-1.47639	-1.43871	-1.38335	-1.37435	fis(IC2),gadE	gadBC;gadC
gadE	1	b3512		gadX	0	-0.514313	-0.82958	-1.31975	-1.4478	-1.43014	-1.47296	-1.4717		gadE;gadE-mdtEF
gadE	1	b3512		gadE	0	-0.514313	-0.82958	-1.31975	-1.4478	-1.43014	-1.47296	-1.4717		gadE;gadE-mdtEF
gadX	2	b3516		gadX	0	-0.237247	-0.310896	-0.522036	-0.586659	-0.318129	-0.333635	-0.382892	fis(IC2)	gadX;gadAX;gadXW
glnL	0	b3869		fis	0	0.00628097	0.037937	0.0594814	-0.0270294	-0.366206	-0.300212	-0.268435	glnL	glnALG;glnLG
gltB	3	b3212		gadE	0	0.164644	0.213675	0.385044	0.32699	-0.337164	-0.481911	-0.387137	fur(C3)	gltBDF
gltD	3	b3213		gadE	0	0.188953	0.170438	0.452254	0.417164	-0.533763	-0.587146	-0.45676	fur(C3)	gltBDF
gltF	3	b3214		gadE	0	0.370358	0.577754	0.833866	0.838925	-0.291248	-0.494149	-0.585803	fur(C3)	gltBDF
infB	0	b3168		fis	0	0.013965	-0.0576563	-0.110317	-0.10329	-0.131148	-0.14495	-0.157322		metY-rimP-nusA-infB-rbfA-truB-rpsO-pnp;rimP-nusA-infB;metY-rimP-nusA-infB
mdtE	1	b3513		gadX	0	-0.536269	-0.864716	-1.27392	-1.50406	-1.72152	-1.81123	-1.86631		gadE-mdtEF;mdtEF
mdtE	1	b3513		gadE	0	-0.536269	-0.864716	-1.27392	-1.50406	-1.72152	-1.81123	-1.86631		gadE-mdtEF;mdtEF
mdtF	1	b3514		gadX	0	-0.544961	-0.774806	-1.16685	-1.37007	-1.58038	-1.61214	-1.79164		gadE-mdtEF;mdtEF
mdtF	1	b3514		gadE	0	-0.544961	-0.774806	-1.16685	-1.37007	-1.58038	-1.61214	-1.79164		gadE-mdtEF;mdtEF
metY	0	b3171		fis										metY-rimP-nusA-infB-rbfA-truB-rpsO-pnp;metY-rimP-nusA-infB;metY
nusA	0	b3169		fis	0	-0.00795036	-0.0802166	-0.157832	-0.153964	-0.215725	-0.236892	-0.268851		metY-rimP-nusA-infB-rbfA-truB-rpsO-pnp;rimP-nusA-infB;metY-rimP-nusA-infB
pnp	0	b3164		fis	0	0.00123024	-0.0240411	-0.00055709	-0.0297778	0.172431	0.126209	0.155331		metY-rimP-nusA-infB-rbfA-truB-rpsO-pnp;pnp;rpsO-pnp
proP	1	b4111		fis	0	-0.143344	-0.339443	-0.542736	-0.763002	-1.4561	-1.59813	-1.5508		proP
rbfA	0	b3167		fis	0	0.0797693	0.0518667	0.0327769	-0.0370585	-0.0335604	-0.0608907	-0.0584769		metY-rimP-nusA-infB-rbfA-truB-rpsO-pnp
rimP	1	b3170		fis	0	-0.0612107	-0.183591	-0.207998	-0.263436	-0.383661	-0.453702	-0.473137		metY-rimP-nusA-infB-rbfA-truB-rpsO-pnp;rimP-nusA-infB;metY-rimP-nusA-infB
rpsO	0	b3165		fis	0	0.0366228	0.0427133	-0.033422	-0.0392918	-0.227514	-0.225391	-0.275978		metY-rimP-nusA-infB-rbfA-truB-rpsO-pnp;rpsO-pnp;rpsO
truB	0	b3166		fis	0	0.060822	-0.0238022	-0.0251676	-0.0370854	-0.0550751	-0.109928	-0.0806966		metY-rimP-nusA-infB-rbfA-truB-rpsO-pnp

## Sheet: C3
Gene	C#	B#	Re-B#	TF	0	0.01	0.03	0.1	0.3	1	3	10	TF+	TU
deoA	2	b4382		cytR	0	-0.0872332	-0.238471	-0.369312	-0.405479	-0.0651439	-0.128886	-0.0540504	fis(C2)	deoCABD;deoABD
deoB	2	b4383		cytR	0	-0.107385	-0.192699	-0.359669	-0.420842	-0.0891351	-0.174797	-0.170485	fis(C2)	deoBD;deoCABD;deoABD
deoC	2	b4381		cytR	0	-0.149989	-0.245225	-0.336009	-0.453006	-0.290026	-0.286707	-0.320784	fis(C2)	deoCABD
deoD	0	b4384		cytR	0	-0.0821991	-0.212184	-0.228821	-0.250483	-0.0611252	-0.118498	-0.0607169	fis(C2)	deoBD;deoCABD;deoABD
galM	0	b0756		hupB	0	-0.014755	-0.0322374	-0.0406161	-0.0731689	0.0253625	-0.0124301	-0.0271492	galS	galETKM;galM
galM	0	b0756		hupA	0	-0.014755	-0.0322374	-0.0406161	-0.0731689	0.0253625	-0.0124301	-0.0271492	galS	galETKM;galM
gltB	1	b3212		fur	0	0.164644	0.213675	0.385044	0.32699	-0.337164	-0.481911	-0.387137	gadE(C2)	gltBDF
gltD	1	b3213		fur	0	0.188953	0.170438	0.452254	0.417164	-0.533763	-0.587146	-0.45676	gadE(C2)	gltBDF
gltF	1	b3214		fur	0	0.370358	0.577754	0.833866	0.838925	-0.291248	-0.494149	-0.585803	gadE(C2)	gltBDF
nagD	0	b0675		nagC	0	0.0105914	0.0628088	0.123189	0.098349	-0.0544711	-0.09861	-0.104783		nagD;nagBACD
rpoH	0	b3461		cytR	0	-0.0988905	0.00984677	-0.0108344	-0.0504219	-0.156481	-0.131803	-0.190558		rpoH
ycdZ	2	b1036		cytR	0	-0.0377548	-0.20553	-0.358022	-0.415635	-0.164299	-0.0640136	-0.0710066		ycdZ

## Sheet: C4
Gene	C#	B#	Re-B#	TF	0	0.01	0.03	0.1	0.3	1	3	10	TF+	TU
acnB	0	b0118		fis	0	-0.0343342	0.0903117	0.280844	0.356312	-0.00556026	-0.0430837	0.055148		acnB
acs	2	b4069		fis	0	0.291402	1.32528	2.01206	2.25205	3.87403	3.98837	4.02508		acs-yjcH-actP
actP	2	b4067		fis	0	0.278302	1.32562	2.16669	2.41852	5.03449	5.19104	5.31001		acs-yjcH-actP;actP
aldB	2	b3588		fis	0	-0.0519866	0.0982225	0.441299	0.633148	3.04508	3.13944	3.26163		aldB
ansB	0	b2957		fis	0	0.124928	0.0935693	0.213659	0.0223305	0.189201	0.16796	0.116307		ansB
bglB	0	b3721		fis	0	0	0	0	0	0	0	0		bglGFB
bglF	0	b3722		fis	0	-0.0435978	-0.079973	0.053852	-0.0626406	-0.370777	-0.299425	-0.110656		bglGFB
bglG	0	b3723		fis	0	0	0	0	0	0	0	0		bglGFB;bglG
crp	0	b3357		fis	0	0.0380987	0.122839	0.174685	0.162126	0.143404	0.0926535	0.119853		crp
fadL	2	b2344		ompR	0	-0.0595359	0.239936	0.461923	0.607111	2.40489	2.50931	2.58567		fadL
flhC	2	b1891		ompR	0	0.219578	0.658548	1.01928	1.08261	1.73356	1.69479	1.71722	fur(IC1)	flhDC;flhC
flhD	2	b1892		ompR	0	0.229676	0.658785	0.992584	1.0804	1.85535	1.76121	1.84754	fur(IC1)	flhDC
fumB	0	b4122		fis	0	-0.0305988	0.0995365	0.147871	-0.0431608	0.230122	0.0491693	0.0458455	dcuR, fur(C1)	dcuB-fumB;fumB
glcC	2	b2980		fis	0	0.117194	0.190473	0.351499	0.303424	1.52317	1.51728	1.58408	glcC(IC1)	glcC
guaA	1	b2507		fis	0	0.0449747	-0.219707	-0.385483	-0.419383	-1.07256	-1.17872	-1.12437		guaBA
guaB	1	b2508		fis	0	0.0641495	-0.211688	-0.491549	-0.568746	-1.20619	-1.2486	-1.301		guaBA
gyrA	1	b2231		fis	0	0.0465362	-0.054086	0.031788	-0.0829659	-0.470094	-0.481894	-0.44341		gyrA
hlyE	2	b1182		fis	0	0.0191808	0.00742827	-0.0593539	-0.20323	1.23093	1.2668	1.13725		hlyE
hupB	2	b0440		fis	0	0.0265346	-0.0492149	0.422353	0.228952	0.482044	0.437913	0.591182		hupB
lyxK	0	b3580		yiaJ	0	0	0	0	0	0.157791	0.0277794	0		yiaKLMNO-lyxK-sgbHUE
mglA	2	b2149		fis	0	0.468625	2.11594	3.02799	3.20381	4.56284	4.58222	4.60072		mglBAC;mglAC
mglC	2	b2148		fis	0	0.322861	1.85383	2.57607	2.79617	3.88264	3.93276	3.95231	flhC,flhD(IC1)	mglBAC;mglAC;mglC
mtlA	2	b3599		fis	0	0.214675	0.65204	1.10537	1.08613	1.96668	1.95887	1.97532	mtlR(IC1)	mtlADR
mtlD	2	b3600		fis	0	0.148972	0.215403	0.527774	0.485413	1.00596	0.925598	0.983246	mtlR(IC1)	mtlADR
mtlR	2	b3601		fis	0	0.178128	0.342172	0.491399	0.593023	1.12502	1.08952	1.08522	mtlR(IC1)	mtlADR
nanA	2	b3225		fis	0	0.118794	0.502959	0.79518	0.916596	2.69207	2.69406	2.75474		nanATEK-yhcH
nanE	2	b3223		fis	0	-0.0432995	0.104422	0.134011	0.0945753	0.898548	0.953068	0.932255		nanATEK-yhcH
nanK	2	b3222		fis	0	-0.0309385	0.0491214	0.102913	0.10207	0.814079	0.778266	0.772395		nanATEK-yhcH
nanT	2	b3224		fis	0	-0.0123381	0.113574	0.23057	0.164834	1.53198	1.57228	1.6433		nanATEK-yhcH
nmpC	2	b0553		ompR	0	0.785481	3.01897	3.77101	4.07696	5.34264	5.33021	5.22275		nmpC
pflB	0	b0903		fis	0	-0.0828817	-0.110836	-0.160858	-0.192851	-0.120674	-0.164699	-0.117892		focA-pflB;pflB
sgbE	0	b3583		yiaJ	0	0.0777673	0.0295098	0.0512456	-0.127137	0.060746	-0.0352677	-0.0234727		yiaKLMNO-lyxK-sgbHUE
sgbH	0	b3581		yiaJ	0	0.0160577	0.0107904	0.177792	0.0916544	0.127561	0.0359095	0.14247		yiaKLMNO-lyxK-sgbHUE
sgbU	0	b3582		yiaJ	0	0.0597535	-0.024305	-0.00354646	0.000978379	0.220497	0.00613414	-0.029674		yiaKLMNO-lyxK-sgbHUE
xylF	2	b3566		fis	0	0.085896	0.219411	0.346585	0.415501	3.73113	3.84165	3.84216	xylR(C1)	xylFGHR
xylG	2	b3567		fis	0	0.013019	0.0126942	0.263179	0.204701	2.11224	2.03874	2.15653	xylR(C1)	xylFGHR
xylH	2	b3568		fis	0	-0.0214436	0.0579513	0.205369	0.152511	1.74075	1.689	1.71694	xylR(C1)	xylFGHR
xylR	0	b3569		fis	0	0.0346299	0.0474307	0.177316	0.0438259	0.390864	0.359986	0.329816	xylR(C1)	xylFGHR;xylR
yhcH	0	b3221		fis	0	-0.0796795	-0.136854	-0.256846	-0.386481	0.209901	0.197483	0.153536		nanATEK-yhcH;yhcH
yiaK	2	b3575		yiaJ	0	0	0.0590562	0.114862	0.167873	1.02238	1.05406	0.966581		yiaKLMNO-lyxK-sgbHUE
yiaN	0	b3578		yiaJ	0	0	0	0	0.00355977	0.0435135	0	0		yiaKLMNO-lyxK-sgbHUE
yiaO	0	b3579		yiaJ	0	0	0	0	0	0.0624991	0.127657	0.0504541		yiaKLMNO-lyxK-sgbHUE
yjcH	2	b4068		fis	0	0.374077	1.58615	2.35836	2.66913	5.14067	5.33208	5.56984		acs-yjcH-actP

[truncated: 4 more sheets: IC1, IC2, IC3, IC4]
