# Supplementary material for: Large-Scale Functional Analysis of CRP-mediated Feed-Forward Loops
Source: Preprints.org preprint supplement (doi:10.20944/preprints201806.0100.v1), 2018-06-06
Supplement: Supplementary file 3 [file Additional File-2.xlsx]

## Sheet: GeneMapping
A	mhpE	P51020
A	sdhA	P0AC41
A	sdhB	P07014
A	sdhC	P69054
A	sdhD	P0AC44
A	sucA	P0AFG3
A	sucB	P0AFG6
A	sucC	P0A836
A	sucD	P0AGE9
A	cirA	P17315
A	nupC	P0AFF2
B	araF	P02924
B	araG	P0AAF3
B	araH	P0AE26
B	dctA	P0A830
B	dcuB	P0ABN9
B	fucA	P0AB87
B	fucI	P69922
B	fucK	P11553
B	fucO	P0A9S1
B	fucP	P11551
B	fucR	P0ACK8
B	idnD	P39346
B	idnK	P39208
B	idnO	P0A9P9
B	idnT	P39344
B	lamB	P02943
B	malK	P68187
B	malM	P03841
B	malS	P25718
B	ompF	P02931
B	prpB	P77541
B	prpC	P31660
B	prpD	P77243
B	prpE	P77495
B	rhaR	P09378
B	tdcD	P11868
B	zraS	P14377
B	acs	P27550
B	actP	P32705
B	aldB	P37685
B	fadL	P10384
B	hlyE	P77335
B	hupB	P0ACF4
B	nanA	P0A6L4
B	nanE	P0A761
B	nanK	P45425
B	nanT	P41036
B	nmpC	P21420
B	yiaK	P37672
B	yjcH	P0AF54
B	aceF	P06959
B	cdd	P0ABF6
B	chbB	P69795
B	cytR	P0ACN7
B	galS	P25748
B	glpD	P13035
B	glpF	P0AER0
B	glpK	P0A6F3
B	gntK	P46859
B	gntU	P0AC96
B	lsrA	P77257
B	lsrB	P76142
B	lsrC	P77672
B	lsrD	P0AFS1
B	lsrF	P76143
B	lsrG	P64461
B	lsrK	P77432
B	lsrR	P76141
B	malI	P18811
B	malX	P19642
B	manX	P69797
B	manY	P69801
B	manZ	P69805
B	nagA	P0AF18
B	nagB	P0A759
B	nagE	P09323
B	nupG	P0AFF4
B	pdhR	P0ACL9
B	prpR	P77743
B	rbsA	P04983
B	rbsB	P02925
B	rbsC	P0AGI1
B	rbsD	P04982
B	rbsK	P0A9J6
B	rbsR	P0ACQ0
B	tsx	P0A927
B	udp	P12758
B	uidA	P05804
B	uidB	P0CE44
B	uidC	Q47706
B	csgD	P52106
B	csgE	P0AE95
B	csgF	P0AE98
B	csgG	P0AEA2
B	exuT	P0AA78
B	nrdA	P00452
B	nrdB	P69924
B	yfaE	P0ABW3
C	caiC	P31552
C	hyfH	P77423
C	hyfI	P77668
C	mhpB	P0ABR9
C	proP	P0C0L7
C	rimP	P0A8A8
C	guaA	P04079
C	guaB	P0ADG7
C	gyrA	P0AES4
C	entA	P15047
C	entB	P0ADI4
C	entD	P19925
C	entH	P0A8Y8
C	bhsA	P0AB40
C	nirD	P0A9I8
C	osmY	P0AFH8
C	yiaJ	P37671
C	araJ	P23910
D	fepA	P05825
D	fiu	P75780
E	mhpA	P77397
E	ycdZ	P75916
E	nirB	P08201
1	gltB	P09831
1	gltD	P09832
1	gltF	P28721
2	fecA	P13036
2	fecB	P15028
2	fecC	P15030
2	fecD	P15029
2	fecE	P15031
2	galP	P0AEP1
2	marA	P0ACH5
2	marB	P31121
2	marR	P27245
3	deoA	P07650
3	deoB	P0A6K6
4	deoC	P0A6L0
4	gadA	P69908
4	gadB	P69910
4	gadC	P63235
4	gadE	P63204
4	gadX	P37639
4	mdtE	P37636
4	mdtF	P37637
5	cyoB	P0ABI8
5	cyoC	P0ABJ3
5	cyoD	P0ABJ6
5	cyoE	P0AEA5
6	flhC	P0ABY7
6	flhD	P0A8S9
6	fumC	P05042
6	galK	P0A6T3
6	glcC	P0ACL5
6	glpT	P08194
6	gntP	P0AC94
6	grcA	P68066
6	malE	P0AEX9
6	malF	P02916
6	malG	P68183
6	mglA	P0AAG8
6	mglB	P0AEE5
6	mglC	P23200
6	mtlA	P00550
6	mtlD	P09424
6	mtlR	P0AF10
6	srlA	P56579
6	srlB	P05706
6	srlD	P05707
6	srlE	P56580
6	srlR	P15082
6	uxuA	P24215
6	uxuB	P39160
6	xylA	P00944
6	xylF	P37387
6	xylG	P37388
6	xylH	P0AGI4

## Sheet: A
A	mhpE	P51020
A	sdhA	P0AC41
A	sdhB	P07014
A	sdhC	P69054
A	sdhD	P0AC44
A	sucA	P0AFG3
A	sucB	P0AFG6
A	sucC	P0A836
A	sucD	P0AGE9
A	cirA	P17315
A	nupC	P0AFF2

## Sheet: B,6
B	araF	P02924
B	araG	P0AAF3
B	araH	P0AE26
B	dctA	P0A830
B	dcuB	P0ABN9
B	fucA	P0AB87
B	fucI	P69922
B	fucK	P11553
B	fucO	P0A9S1
B	fucP	P11551
B	fucR	P0ACK8
B	idnD	P39346
B	idnK	P39208
B	idnO	P0A9P9
B	idnT	P39344
B	lamB	P02943
B	malK	P68187
B	malM	P03841
B	malS	P25718
B	ompF	P02931
B	prpB	P77541
B	prpC	P31660
B	prpD	P77243
B	prpE	P77495
B	rhaR	P09378
B	tdcD	P11868
B	zraS	P14377
B	acs	P27550
B	actP	P32705
B	aldB	P37685
B	fadL	P10384
B	hlyE	P77335
B	hupB	P0ACF4
B	nanA	P0A6L4
B	nanE	P0A761
B	nanK	P45425
B	nanT	P41036
B	nmpC	P21420
B	yiaK	P37672
B	yjcH	P0AF54
B	aceF	P06959
B	cdd	P0ABF6
B	chbB	P69795
B	cytR	P0ACN7
B	galS	P25748
B	glpD	P13035
B	glpF	P0AER0
B	glpK	P0A6F3
B	gntK	P46859
B	gntU	P0AC96
B	lsrA	P77257
B	lsrB	P76142
B	lsrC	P77672
B	lsrD	P0AFS1
B	lsrF	P76143
B	lsrG	P64461
B	lsrK	P77432
B	lsrR	P76141
B	malI	P18811
B	malX	P19642
B	manX	P69797
B	manY	P69801
B	manZ	P69805
B	nagA	P0AF18
B	nagB	P0A759
B	nagE	P09323
B	nupG	P0AFF4
B	pdhR	P0ACL9
B	prpR	P77743
B	rbsA	P04983
B	rbsB	P02925
B	rbsC	P0AGI1
B	rbsD	P04982
B	rbsK	P0A9J6
B	rbsR	P0ACQ0
B	tsx	P0A927
B	udp	P12758
B	uidA	P05804
B	uidB	P0CE44
B	uidC	Q47706
B	csgD	P52106
B	csgE	P0AE95
B	csgF	P0AE98
B	csgG	P0AEA2
B	exuT	P0AA78
B	nrdA	P00452
B	nrdB	P69924
B	yfaE	P0ABW3
6	flhC	P0ABY7
6	flhD	P0A8S9
6	fumC	P05042
6	galK	P0A6T3
6	glcC	P0ACL5
6	glpT	P08194
6	gntP	P0AC94
6	grcA	P68066
6	malE	P0AEX9
6	malF	P02916
6	malG	P68183
6	mglA	P0AAG8
6	mglB	P0AEE5
6	mglC	P23200
6	mtlA	P00550
6	mtlD	P09424
6	mtlR	P0AF10
6	srlA	P56579
6	srlB	P05706
6	srlD	P05707
6	srlE	P56580
6	srlR	P15082
6	uxuA	P24215
6	uxuB	P39160
6	xylA	P00944
6	xylF	P37387
6	xylG	P37388
6	xylH	P0AGI4

## Sheet: C,2,4
C	caiC	P31552
C	hyfH	P77423
C	hyfI	P77668
C	mhpB	P0ABR9
C	proP	P0C0L7
C	rimP	P0A8A8
C	guaA	P04079
C	guaB	P0ADG7
C	gyrA	P0AES4
C	entA	P15047
C	entB	P0ADI4
C	entD	P19925
C	entH	P0A8Y8
C	bhsA	P0AB40
C	nirD	P0A9I8
C	osmY	P0AFH8
C	yiaJ	P37671
C	araJ	P23910
2	fecA	P13036
2	fecB	P15028
2	fecC	P15030
2	fecD	P15029
2	fecE	P15031
2	galP	P0AEP1
2	marA	P0ACH5
2	marB	P31121
2	marR	P27245
4	deoC	P0A6L0
4	gadA	P69908
4	gadB	P69910
4	gadC	P63235
4	gadE	P63204
4	gadX	P37639
4	mdtE	P37636
4	mdtF	P37637

## Sheet: D,1,5
D	fepA	P05825
D	fiu	P75780
1	gltB	P09831
1	gltD	P09832
1	gltF	P28721
5	cyoB	P0ABI8
5	cyoC	P0ABJ3
5	cyoD	P0ABJ6
5	cyoE	P0AEA5

## Sheet: E,3
E	mhpA	P77397
E	ycdZ	P75916
E	nirB	P08201
3	deoA	P07650
3	deoB	P0A6K6

## Sheet: A_GO
A	Biological Process
	GO Term	Aspect	P-value	Sample frequency	Background frequency	Genes
	GO:0006099 tricarboxylic acid cycle	P	1.6e-11	8/11 (72.7%)	23/1632 (1.4%)	sdhA sucB sucA sucD sdhC sdhB sucCsdhD
	GO:0009060 aerobic respiration	P	2.54e-10	8/11 (72.7%)	31/1632 (1.9%)	sdhA sucB sucA sucD sdhC sdhB sucCsdhD
	GO:0045333 cellular respiration	P	1.41e-08	8/11 (72.7%)	49/1632 (3.0%)	sdhA sucB sucA sucD sdhC sdhB sucCsdhD
	GO:0015980 energy derivation by oxidation of organic compounds	P	9.03e-08	8/11 (72.7%)	61/1632 (3.7%)	sdhA sucB sucA sucD sdhC sdhB sucCsdhD
	GO:0006091 generation of precursor metabolites and energy	P	1.71e-06	8/11 (72.7%)	87/1632 (5.3%)	sdhA sucB sucA sucD sdhC sdhB sucCsdhD
	GO:0022900 electron transport chain	P	0.00699	4/11 (36.4%)	30/1632 (1.8%)	sdhA sdhC sdhB sdhD
	Molecular Function
	GO Term	Aspect	P-value	Sample frequency	Background frequency	Genes
	GO:0000104 succinate dehydrogenase activity	F	2.79e-07	4/11 (36.4%)	4/1632 (0.2%)	sdhA sdhC sdhB sdhD
	GO:0016627 oxidoreductase activity, acting on the CH-CH group of donors	F	0.00157	4/11 (36.4%)	21/1632 (1.3%)	sdhA sdhC sdhB sdhD

## Sheet: B,6_GO
B, 6	Biological Process
	GO Term	Aspect	P-value	Sample frequency	Background frequency	Genes
	GO:0008643 carbohydrate transport	P	8.25e-27	39/116 (33.6%)	70/1676 (4.2%)	xylH fucP xylF mglC araF srlB glpT mtlA mglA chbB rbsA nanT nagE malM idnT malE malFsrlA lamB malX exuT gntU xylG uidC gntP manZ malK dctA manY rbsB araH araG glpF srlEmalG manX rbsC srlR mglB
	GO:0071702 organic substance transport	P	6.97e-12	46/116 (39.7%)	210/1676 (12.5%)	xylH fucP xylF mglC araF srlB glpT mtlA mglA csgG chbB rbsA actP nanT nagE malM idnTmalE malF srlA lamB malX fadL nupG exuT gntU xylG csgE uidC dcuB gntP tsx manZ malKdctA manY rbsB araH araG glpF srlE malG manX rbsC srlR mglB
	GO:0006810 transport	P	2.5e-08	52/116 (44.8%)	319/1676 (19.0%)	xylH fucP xylF mglC araF srlB glpT mtlA mglA csgG chbB rbsA actP nmpC nanT nagE malMlsrD idnT malE malF uidB srlA lamB malX fadL nupG exuT gntU xylG csgE uidC ompF dcuBgntP tsx manZ malK dctA manY rbsB araH araG glpF srlE lsrC malG manX rbsC srlR lsrAmglB
	GO:0051234 establishment of localization	P	2.84e-08	52/116 (44.8%)	320/1676 (19.1%)	xylH fucP xylF mglC araF srlB glpT mtlA mglA csgG chbB rbsA actP nmpC nanT nagE malMlsrD idnT malE malF uidB srlA lamB malX fadL nupG exuT gntU xylG csgE uidC ompF dcuBgntP tsx manZ malK dctA manY rbsB araH araG glpF srlE lsrC malG manX rbsC srlR lsrAmglB
	GO:0044765 single-organism transport	P	5.77e-08	49/116 (42.2%)	294/1676 (17.5%)	xylH fucP xylF mglC araF srlB glpT mtlA mglA csgG chbB rbsA actP nmpC nanT nagE malMidnT malE malF uidB srlA lamB malX fadL nupG exuT gntU xylG csgE uidC ompF dcuB gntPtsx manZ malK dctA manY rbsB araH araG glpF srlE malG manX rbsC srlR mglB
	GO:0051179 localization	P	2.38e-07	52/116 (44.8%)	337/1676 (20.1%)	xylH fucP xylF mglC araF srlB glpT mtlA mglA csgG chbB rbsA actP nmpC nanT nagE malMlsrD idnT malE malF uidB srlA lamB malX fadL nupG exuT gntU xylG csgE uidC ompF dcuBgntP tsx manZ malK dctA manY rbsB araH araG glpF srlE lsrC malG manX rbsC srlR lsrAmglB
	GO:0009401phosphoenolpyruvate-dependent sugar phosphotransferase system	P	3.11e-05	11/116 (9.5%)	22/1676 (1.3%)	srlB mtlA chbB nagE srlA malX manZ manY srlE manX srlR
	GO:0044724 single-organism carbohydrate catabolic process	P	0.000334	22/116 (19.0%)	101/1676 (6.0%)	rbsD fucK glpD galK idnT fucO rbsK gntK uidA malS xylA fucA gntP srlD aceF uxuA idnOuxuB idnD fucI idnK glpK
	GO:0015750 pentose transport	P	0.000494	7/116 (6.0%)	10/1676 (0.6%)	xylH fucP xylF araF xylG araH araG
	GO:0019521 D-gluconate metabolic process	P	0.000494	7/116 (6.0%)	10/1676 (0.6%)	idnT gntK gntU gntP idnO idnD idnK
	GO:0042956 maltodextrin transport	P	0.00112	5/116 (4.3%)	5/1676 (0.3%)	malE malF lamB malK malG
	GO:0019262 N-acetylneuraminate catabolic process	P	0.00112	5/116 (4.3%)	5/1676 (0.3%)	nagA nanA nagB nanE nanK
	GO:0006054 N-acetylneuraminate metabolic process	P	0.00112	5/116 (4.3%)	5/1676 (0.3%)	nagA nanA nagB nanE nanK
	GO:0015768 maltose transport	P	0.00112	5/116 (4.3%)	5/1676 (0.3%)	malE malF lamB malK malG
	GO:0016052 carbohydrate catabolic process	P	0.00115	22/116 (19.0%)	108/1676 (6.4%)	rbsD fucK glpD galK idnT fucO rbsK gntK uidA malS xylA fucA gntP srlD aceF uxuA idnOuxuB idnD fucI idnK glpK
	GO:0044282 small molecule catabolic process	P	0.00236	24/116 (20.7%)	130/1676 (7.8%)	prpD glpD idnT nagA nanA fucO tdcD gntK uidA acs prpE gntP nagB nanE nanK srlD uxuAprpB idnO prpR uxuB idnD idnK glpK
	GO:0044712 single-organism catabolic process	P	0.00273	24/116 (20.7%)	131/1676 (7.8%)	prpD glpD idnT nagA nanA fucO tdcD gntK uidA acs prpE gntP nagB nanE nanK srlD uxuAprpB idnO prpR uxuB idnD idnK glpK
	GO:0015749 monosaccharide transport	P	0.00477	9/116 (7.8%)	22/1676 (1.3%)	xylH fucP xylF araF mglA exuT xylG araH araG
	GO:0005975 carbohydrate metabolic process	P	0.00795	35/116 (30.2%)	250/1676 (14.9%)	fucP rbsD glpT fucK lsrK glpD galK mtlD idnT nagA nanA fucO rbsK gntK uidA malS gntUxylA fucA gntP nagB fucR nanE nanK srlD aceF uxuA prpC rhaR idnO uxuB idnD fucI idnKglpK
	Molecular Function
	GO Term	Aspect	P-value	Sample frequency	Background frequency	Genes
	GO:1901476 carbohydrate transporter activity	F	1.1e-17	28/116 (24.1%)	52/1676 (3.1%)	xylH fucP araF srlB glpT mtlA mglA chbB rbsA nanT nagE idnT malE malF lamB malXexuT gntU xylG gntP manZ malK manY araG glpF srlE malG manX
	GO:0015144 carbohydrate transmembrane transporter activity	F	1.1e-17	28/116 (24.1%)	52/1676 (3.1%)	xylH fucP araF srlB glpT mtlA mglA chbB rbsA nanT nagE idnT malE malF lamB malXexuT gntU xylG gntP manZ malK manY araG glpF srlE malG manX
	GO:0051119 sugar transmembrane transporter activity	F	2.5e-12	21/116 (18.1%)	40/1676 (2.4%)	xylH fucP araF mtlA mglA rbsA nagE malE malF lamB malX exuT gntU xylG gntP manZmalK manY araG malG manX
	GO:0015145 monosaccharide transmembrane transporter activity	F	1.78e-06	11/116 (9.5%)	18/1676 (1.1%)	xylH fucP araF mglA rbsA exuT xylG manZ manY araG manX
	GO:0043211 carbohydrate-transporting ATPase activity	F	2.72e-06	8/116 (6.9%)	9/1676 (0.5%)	araF mglA rbsA malF xylG malK araG malG
	GO:0005215 transporter activity	F	1.79e-05	42/116 (36.2%)	267/1676 (15.9%)	xylH fucP mglC araF srlB glpT mtlA mglA chbB rbsA actP nmpC nanT nagE lsrD idnTmalE malF uidB lamB malX nupG exuT gntU xylG uidC ompF dcuB gntP tsx manZ malKdctA manY araH araG glpF srlE lsrC malG manX rbsC
	GO:0008982 protein-N(PI)-phosphohistidine-sugar phosphotransferase activity	F	3.09e-05	9/116 (7.8%)	14/1676 (0.8%)	srlB mtlA chbB nagE malX manZ manY srlE manX
	GO:0022891 substrate-specific transmembrane transporter activity	F	8.24e-05	34/116 (29.3%)	199/1676 (11.9%)	xylH fucP araF srlB glpT mtlA mglA chbB rbsA actP nanT nagE idnT malE malF lamBmalX nupG exuT gntU xylG ompF dcuB gntP tsx manZ malK dctA manY araG glpF srlEmalG manX
	GO:0022857 transmembrane transporter activity	F	0.000229	36/116 (31.0%)	227/1676 (13.5%)	xylH fucP araF srlB glpT mtlA mglA chbB rbsA actP nmpC nanT nagE idnT malE malFlamB malX nupG exuT gntU xylG uidC ompF dcuB gntP tsx manZ malK dctA manYaraG glpF srlE malG manX
	GO:0022892 substrate-specific transporter activity	F	0.000951	34/116 (29.3%)	219/1676 (13.1%)	xylH fucP araF srlB glpT mtlA mglA chbB rbsA actP nanT nagE idnT malE malF lamBmalX nupG exuT gntU xylG ompF dcuB gntP tsx manZ malK dctA manY araG glpF srlEmalG manX
	GO:0005363 maltose transmembrane transporter activity	F	0.00112	5/116 (4.3%)	5/1676 (0.3%)	malE malF lamB malK malG
	GO:0015608 carbohydrate-importing ATPase activity	F	0.00112	5/116 (4.3%)	5/1676 (0.3%)	malF xylG malK araG malG
	GO:0022804 active transmembrane transporter activity	F	0.00198	26/116 (22.4%)	147/1676 (8.8%)	fucP araF srlB glpT mtlA mglA chbB rbsA actP nanT nagE malF malX gntU xylG ompFdcuB gntP manZ malK dctA manY araG srlE malG manX
	GO:0016773 phosphotransferase activity, alcohol group as acceptor	F	0.00389	18/116 (15.5%)	82/1676 (4.9%)	srlB mtlA fucK lsrK zraS chbB galK nagE malX rbsK gntK manZ nanK manY srlE manXidnK glpK
	GO:0015407 monosaccharide-transporting ATPase activity	F	0.00636	5/116 (4.3%)	6/1676 (0.4%)	araF mglA rbsA xylG araG
B	Biological Process
	GO Term	Aspect	P-value	Sample frequency	Background frequency	Genes
	GO:0008643 carbohydrate transport	P	1.35e-12	23/88 (26.1%)	61/1663 (3.7%)	fucP araF chbB rbsA nanT nagE malM idnT lamB malX exuT gntU uidC manZ malK dctA manY rbsB araH araG glpF manX rbsC
	GO:0071702 organic substance transport	P	1.59e-05	30/88 (34.1%)	201/1663 (12.1%)	fucP araF csgG chbB rbsA actP nanT nagE malM idnT lamB malX fadL nupG exuT gntU csgE uidC dcuB tsx manZ malK dctA manYrbsB araH araG glpF manX rbsC
	GO:0019262 N-acetylneuraminate catabolic process	P	0.000271	5/88 (5.7%)	5/1663 (0.3%)	nagA nanA nagB nanE nanK
	GO:0006054 N-acetylneuraminate metabolic process	P	0.000271	5/88 (5.7%)	5/1663 (0.3%)	nagA nanA nagB nanE nanK
	GO:0006810 transport	P	0.000354	36/88 (40.9%)	310/1663 (18.6%)	fucP araF csgG chbB rbsA actP nmpC nanT nagE malM lsrD idnT uidB lamB malX fadL nupG exuT gntU csgE uidC ompF dcuB tsxmanZ malK dctA manY rbsB araH araG glpF lsrC manX rbsC lsrA
	GO:0051234 establishment of localization	P	0.000386	36/88 (40.9%)	311/1663 (18.7%)	fucP araF csgG chbB rbsA actP nmpC nanT nagE malM lsrD idnT uidB lamB malX fadL nupG exuT gntU csgE uidC ompF dcuB tsxmanZ malK dctA manY rbsB araH araG glpF lsrC manX rbsC lsrA
	GO:0019521 D-gluconate metabolic process	P	0.001	6/88 (6.8%)	9/1663 (0.5%)	idnT gntK gntU idnO idnD idnK
	GO:0044765 single-organism transport	P	0.00152	33/88 (37.5%)	285/1663 (17.1%)	fucP araF csgG chbB rbsA actP nmpC nanT nagE malM idnT uidB lamB malX fadL nupG exuT gntU csgE uidC ompF dcuB tsx manZmalK dctA manY rbsB araH araG glpF manX rbsC
	GO:0051179 localization	P	0.00155	36/88 (40.9%)	328/1663 (19.7%)	fucP araF csgG chbB rbsA actP nmpC nanT nagE malM lsrD idnT uidB lamB malX fadL nupG exuT gntU csgE uidC ompF dcuB tsxmanZ malK dctA manY rbsB araH araG glpF lsrC manX rbsC lsrA
	GO:0006004 fucose metabolic process	P	0.0024	6/88 (6.8%)	10/1663 (0.6%)	fucP fucK fucO fucA fucR fucI
	GO:0044282 small molecule catabolic process	P	0.00368	20/88 (22.7%)	129/1663 (7.8%)	prpD glpD idnT nagA nanA fucO tdcD gntK uidA acs prpE nagB nanE nanK prpB idnO prpR idnD idnK glpK
	GO:0044712 single-organism catabolic process	P	0.00417	20/88 (22.7%)	130/1663 (7.8%)	prpD glpD idnT nagA nanA fucO tdcD gntK uidA acs prpE nagB nanE nanK prpB idnO prpR idnD idnK glpK
	GO:0046348 amino sugar catabolic process	P	0.00523	5/88 (5.7%)	7/1663 (0.4%)	nagA nanA nagB nanE nanK
	GO:0046183 L-idonate catabolic process	P	0.00536	4/88 (4.5%)	4/1663 (0.2%)	idnT idnO idnD idnK
	GO:0019523 L-idonate metabolic process	P	0.00536	4/88 (4.5%)	4/1663 (0.2%)	idnT idnO idnD idnK
	GO:0019541 propionate metabolic process	P	0.00968	6/88 (6.8%)	12/1663 (0.7%)	prpD tdcD prpE prpC prpB prpR
6	Biological Process
	GO Term	Aspect	P-value	Sample frequency	Background frequency	Genes
	GO:0008643 carbohydrate transport	P	1.01e-14	16/28 (57.1%)	60/1643 (3.7%)	xylH xylF mglC malE srlB srlE malF glpT mtlA xylG mglA srlA malG gntP srlRmglB
	GO:0071702 organic substance transport	P	3.45e-06	16/28 (57.1%)	198/1643 (12.1%)	xylH xylF mglC malE srlB srlE malF glpT mtlA xylG mglA srlA malG gntP srlRmglB
	GO:0044765 single-organism transport	P	0.000555	16/28 (57.1%)	280/1643 (17.0%)	xylH xylF mglC malE srlB srlE malF glpT mtlA xylG mglA srlA malG gntP srlRmglB
	GO:0006810 transport	P	0.0016	16/28 (57.1%)	302/1643 (18.4%)	xylH xylF mglC malE srlB srlE malF glpT mtlA xylG mglA srlA malG gntP srlRmglB
	GO:0015752 D-ribose transport	P	0.00168	3/28 (10.7%)	3/1643 (0.2%)	xylH xylF xylG
	GO:0051234 establishment of localization	P	0.00168	16/28 (57.1%)	303/1643 (18.4%)	xylH xylF mglC malE srlB srlE malF glpT mtlA xylG mglA srlA malG gntP srlRmglB
	GO:0009401 phosphoenolpyruvate-dependent sugar phosphotransferase system	P	0.00275	5/28 (17.9%)	18/1643 (1.1%)	srlB srlE mtlA srlA srlR
	GO:0051179 localization	P	0.00357	16/28 (57.1%)	320/1643 (19.5%)	xylH xylF mglC malE srlB srlE malF glpT mtlA xylG mglA srlA malG gntP srlRmglB
	GO:0042956 maltodextrin transport	P	0.00664	3/28 (10.7%)	4/1643 (0.2%)	malE malF malG
	GO:0015753 D-xylose transport	P	0.00664	3/28 (10.7%)	4/1643 (0.2%)	xylH xylF xylG
	GO:0015768 maltose transport	P	0.00664	3/28 (10.7%)	4/1643 (0.2%)	malE malF malG

## Sheet: C,2,4_GO
C, 2, 4	Biological Process
	GO Term	Aspect	P-value	Sample frequency	Background frequency	Genes
	GO:0055080 cation homeostasis	P	0.000283	8/35 (22.9%)	38/1648 (2.3%)	gadC fecB fecE gadB fecA gadA fecCfecD
	GO:0050801 ion homeostasis	P	0.000351	8/35 (22.9%)	39/1648 (2.4%)	gadC fecB fecE gadB fecA gadA fecCfecD
	GO:0048878 chemical homeostasis	P	0.000529	8/35 (22.9%)	41/1648 (2.5%)	gadC fecB fecE gadB fecA gadA fecCfecD
	GO:0019748 secondary metabolic process	P	0.00187	5/35 (14.3%)	13/1648 (0.8%)	entH entB entD mhpB entA
	GO:0009239 enterobactin biosynthetic process	P	0.00291	4/35 (11.4%)	7/1648 (0.4%)	entH entB entD entA
	GO:0009713 catechol-containing compound biosynthetic process	P	0.00291	4/35 (11.4%)	7/1648 (0.4%)	entH entB entD entA
	GO:0019540 siderophore biosynthetic process from catechol	P	0.00291	4/35 (11.4%)	7/1648 (0.4%)	entH entB entD entA
	GO:0019290 siderophore biosynthetic process	P	0.00291	4/35 (11.4%)	7/1648 (0.4%)	entH entB entD entA
	GO:0046189 phenol-containing compound biosynthetic process	P	0.00291	4/35 (11.4%)	7/1648 (0.4%)	entH entB entD entA
	GO:0044550 secondary metabolite biosynthetic process	P	0.00573	4/35 (11.4%)	8/1648 (0.5%)	entH entB entD entA
	GO:0009238 enterobactin metabolic process	P	0.00573	4/35 (11.4%)	8/1648 (0.5%)	entH entB entD entA
	GO:0009237 siderophore metabolic process	P	0.00573	4/35 (11.4%)	8/1648 (0.5%)	entH entB entD entA
C	Biological Process
	GO Term	Aspect	P-value	Sample frequency	Background frequency	Genes
	GO:0019748 secondary metabolic process	P	4.04e-05	5/18 (27.8%)	13/1637 (0.8%)	entB entD entH mhpB entA
	GO:0019540 siderophore biosynthetic process from catechol	P	0.000132	4/18 (22.2%)	7/1637 (0.4%)	entB entD entH entA
	GO:0009239 enterobactin biosynthetic process	P	0.000132	4/18 (22.2%)	7/1637 (0.4%)	entB entD entH entA
	GO:0019290 siderophore biosynthetic process	P	0.000132	4/18 (22.2%)	7/1637 (0.4%)	entB entD entH entA
	GO:0009713 catechol-containing compound biosynthetic process	P	0.000132	4/18 (22.2%)	7/1637 (0.4%)	entB entD entH entA
	GO:0046189 phenol-containing compound biosynthetic process	P	0.000132	4/18 (22.2%)	7/1637 (0.4%)	entB entD entH entA
	GO:0044550 secondary metabolite biosynthetic process	P	0.000263	4/18 (22.2%)	8/1637 (0.5%)	entB entD entH entA
	GO:0009238 enterobactin metabolic process	P	0.000263	4/18 (22.2%)	8/1637 (0.5%)	entB entD entH entA
	GO:0009237 siderophore metabolic process	P	0.000263	4/18 (22.2%)	8/1637 (0.5%)	entB entD entH entA
	GO:0009712 catechol-containing compound metabolic process	P	0.00047	4/18 (22.2%)	9/1637 (0.5%)	entB entD entH entA
	GO:0018958 phenol-containing compound metabolic process	P	0.000778	4/18 (22.2%)	10/1637 (0.6%)	entB entD entH entA
	GO:1901617 organic hydroxy compound biosynthetic process	P	0.00181	4/18 (22.2%)	12/1637 (0.7%)	entB entD entH entA
	GO:0019184 nonribosomal peptide biosynthetic process	P	0.00181	4/18 (22.2%)	12/1637 (0.7%)	entB entD entH entA
	GO:0043043 peptide biosynthetic process	P	0.00259	4/18 (22.2%)	13/1637 (0.8%)	entB entD entH entA
2	Biological Process
	GO Term	Aspect	P-value	Sample frequency	Background frequency	Genes
	GO:0055072 iron ion homeostasis	P	1.72e-05	5/9 (55.6%)	25/1637 (1.5%)	fecE fecA fecC fecB fecD
	GO:0055076 transition metal ion homeostasis	P	4.55e-05	5/9 (55.6%)	30/1637 (1.8%)	fecE fecA fecC fecB fecD
	GO:0055065 metal ion homeostasis	P	6.41e-05	5/9 (55.6%)	32/1637 (2.0%)	fecE fecA fecC fecB fecD
	GO:0055080 cation homeostasis	P	0.000137	5/9 (55.6%)	37/1637 (2.3%)	fecE fecA fecC fecB fecD
	GO:0050801 ion homeostasis	P	0.000158	5/9 (55.6%)	38/1637 (2.3%)	fecE fecA fecC fecB fecD
	GO:0048878 chemical homeostasis	P	0.000206	5/9 (55.6%)	40/1637 (2.4%)	fecE fecA fecC fecB fecD
	GO:0042592 homeostatic process	P	0.00164	5/9 (55.6%)	60/1637 (3.7%)	fecE fecA fecC fecB fecD
4	Biological Process
	GO Term	Aspect	P-value	Sample frequency	Background frequency	Genes
	GO:0045852 pH elevation	P	0.000141	3/8 (37.5%)	5/1634 (0.3%)	gadC gadB gadA
	GO:0051454 intracellular pH elevation	P	0.000141	3/8 (37.5%)	5/1634 (0.3%)	gadC gadB gadA
	GO:0030641 regulation of cellular pH	P	0.00028	3/8 (37.5%)	6/1634 (0.4%)	gadC gadB gadA
	GO:0051453 regulation of intracellular pH	P	0.00028	3/8 (37.5%)	6/1634 (0.4%)	gadC gadB gadA
	GO:0030004 cellular monovalent inorganic cation homeostasis	P	0.00049	3/8 (37.5%)	7/1634 (0.4%)	gadC gadB gadA
	GO:0006885 regulation of pH	P	0.00049	3/8 (37.5%)	7/1634 (0.4%)	gadC gadB gadA
	GO:0055067 monovalent inorganic cation homeostasis	P	0.000782	3/8 (37.5%)	8/1634 (0.5%)	gadC gadB gadA

## Sheet: D,1,5_GO
D, 1, 5	Biological Process
	GO Term	Aspect	P-value	Sample frequency	Background frequency	Genes
	GO:0015990 electron transport coupled proton transport	P	2.51e-05	3/9 (33.3%)	3/1634 (0.2%)	cyoB cyoCcyoD
	GO:0019646 aerobic electron transport chain	P	0.00025	3/9 (33.3%)	5/1634 (0.3%)	cyoB cyoCcyoD
	GO:0015988 energy coupled proton transmembrane transport, against electrochemical gradient	P	0.000498	3/9 (33.3%)	6/1634 (0.4%)	cyoB cyoCcyoD
	GO:0022904 respiratory electron transport chain	P	0.00539	3/9 (33.3%)	12/1634 (0.7%)	cyoB cyoCcyoD
	GO:0097054 L-glutamate biosynthetic process	P	0.00586	2/9 (22.2%)	2/1634 (0.1%)	gltB gltD
	Cellular Component
	GO Term	Aspect	P-value	Sample frequency	Background frequency	Genes
	GO:0009319 cytochrome o ubiquinol oxidase complex	C	0.0001	3/9 (33.3%)	4/1634 (0.2%)	cyoB cyoC cyoD
	Molecular Function
	GO Term	Aspect	P-value	Sample frequency	Background frequency	Genes
	GO:0009486 cytochrome bo3 ubiquinol oxidase activity	F	0.0001	3/9 (33.3%)	4/1634 (0.2%)	cyoB cyoC cyoD
	GO:0015453 oxidoreduction-driven active transmembrane transporter activity	F	0.0001	3/9 (33.3%)	4/1634 (0.2%)	cyoB cyoC cyoD
	GO:0015002 heme-copper terminal oxidase activity	F	0.0001	3/9 (33.3%)	4/1634 (0.2%)	cyoB cyoC cyoD
	GO:0016682 oxidoreductase activity, acting on diphenols and related substances as donors, oxygen as acceptor	F	0.00025	3/9 (33.3%)	5/1634 (0.3%)	cyoB cyoC cyoD
	GO:0016679 oxidoreductase activity, acting on diphenols and related substances as donors	F	0.000498	3/9 (33.3%)	6/1634 (0.4%)	cyoB cyoC cyoD
	GO:0022890 inorganic cation transmembrane transporter activity	F	0.00127	5/9 (55.6%)	59/1634 (3.6%)	cyoB fepA fiu cyoCcyoD
	GO:0015930 glutamate synthase activity	F	0.00586	2/9 (22.2%)	2/1634 (0.1%)	gltB gltD
	GO:0045181 glutamate synthase activity, NAD(P)H as acceptor	F	0.00586	2/9 (22.2%)	2/1634 (0.1%)	gltB gltD
	GO:0004355 glutamate synthase (NADPH) activity	F	0.00586	2/9 (22.2%)	2/1634 (0.1%)	gltB gltD
D	Biological Process
	GO Term	Aspect	P-value	Sample frequency	Background frequency	Genes
	GO:0044718 siderophore transmembrane transport	P	0.000783	2/2 (100.0%)	5/1630 (0.3%)	fepA fiu
	GO:0015891 siderophore transport	P	0.00219	2/2 (100.0%)	8/1630 (0.5%)	fepA fiu
	GO:0015688 iron chelate transport	P	0.00219	2/2 (100.0%)	8/1630 (0.5%)	fepA fiu
	GO:0033214 iron assimilation by chelation and transport	P	0.00219	2/2 (100.0%)	8/1630 (0.5%)	fepA fiu
	GO:0033212 iron assimilation	P	0.00353	2/2 (100.0%)	10/1630 (0.6%)	fepA fiu
	GO:1901678 iron coordination entity transport	P	0.00517	2/2 (100.0%)	12/1630 (0.7%)	fepA fiu
	GO:0006879 cellular iron ion homeostasis	P	0.00611	2/2 (100.0%)	13/1630 (0.8%)	fepA fiu
1	Biological Process
	GO Term	Aspect	P-value	Sample frequency	Background frequency	Genes
	GO:0097054 L-glutamate biosynthetic process	P	0.000171	2/3 (66.7%)	2/1632 (0.1%)	gltD gltB
	GO:0006537 glutamate biosynthetic process	P	0.00257	2/3 (66.7%)	6/1632 (0.4%)	gltD gltB
5	Biological Process
	GO Term	Aspect	P-value	Sample frequency	Background frequency	Genes
	GO:0015990 electron transport coupled proton transport	P	6.14e-07	3/4 (75.0%)	3/1632 (0.2%)	cyoB cyoC cyoD
	GO:0019646 aerobic electron transport chain	P	6.13e-06	3/4 (75.0%)	5/1632 (0.3%)	cyoB cyoC cyoD
	GO:0015988 energy coupled proton transmembrane transport, against electrochemical gradient	P	1.23e-05	3/4 (75.0%)	6/1632 (0.4%)	cyoB cyoC cyoD
	GO:0022904 respiratory electron transport chain	P	0.000135	3/4 (75.0%)	12/1632 (0.7%)	cyoB cyoC cyoD
	GO:0006818 hydrogen transport	P	0.000694	3/4 (75.0%)	20/1632 (1.2%)	cyoB cyoC cyoD
	GO:0015992 proton transport	P	0.000694	3/4 (75.0%)	20/1632 (1.2%)	cyoB cyoC cyoD
	GO:0022900 electron transport chain	P	0.00246	3/4 (75.0%)	30/1632 (1.8%)	cyoB cyoC cyoD
	GO:0009060 aerobic respiration	P	0.00272	3/4 (75.0%)	31/1632 (1.9%)	cyoB cyoC cyoD
	GO:0015672 monovalent inorganic cation transport	P	0.0047	3/4 (75.0%)	37/1632 (2.3%)	cyoB cyoC cyoD

[truncated: 2 more sheets: E,3_GO, Table 3]
